# Supplementary material for: Photoredox/Cu dual catalyzed 1,4-cyanosulfonylation enabled by remote cyano migration
Source: Royal Society of Chemistry journal article supplement (doi:10.1039/d4qo00827h), 2024-01-01

Electronic Supplementary Material (ESI) for Organic Chemistry Frontiers.  
This journal is © the Partner Organisations 2024

**Photoredox/Cu dual catalyzed 1,4-cyanosulfonylation enabled by  
remote cyano migration**

Xiaofei Xie,<sup>a</sup> Yan Li,<sup>a</sup> Zhengyuan Bo,<sup>a</sup> Yingguang Zhu<sup>a,\*</sup> and Kang Chen<sup>a,\*</sup>

<sup>a</sup>*Jiangsu Key Laboratory of Pesticide Science and Department of Chemistry, College  
of Sciences, Nanjing Agricultural University, Nanjing 210095, China*

Email: ygzhu@njau.edu.cn; kchen@njau.edu.cn

**Table of Contents**

|                                                                                                                         |     |
|-------------------------------------------------------------------------------------------------------------------------|-----|
| 1. General information.....                                                                                             | S2  |
| 2. General procedures for photoredox/Cu dual catalyzed 1,4-cyanosulfonylation<br>enabled by remote cyano migration..... | S3  |
| 3. X-Ray single crystal diffraction analysis of the product <b>3ea</b> .....                                            | S5  |
| 4. Derivatizations of product <b>3aa</b> .....                                                                          | S7  |
| 5. Mechanistic studies.....                                                                                             | S8  |
| 6. Characterization data.....                                                                                           | S10 |
| 7. References.....                                                                                                      | S24 |
| 8. NMR spectra.....                                                                                                     | S25 |

## 1. General information

All commercially available reagents were used without further purification. Column chromatography was performed on silica gel (200-300 mesh).  $^1\text{H}$  NMR,  $^{13}\text{C}$  NMR, and  $^{19}\text{F}$  NMR spectra were recorded on Bruker 400 MHz and JOEL 500 MHz NMR spectrometers. Chemical shifts ( $\delta$ ) were reported in ppm, and coupling constants ( $J$ ) were given in Hertz (Hz). Data were reported as s = singlet, d = doublet, t = triplet, q = quartet, dd = doublet of doublets, br = broad, m = multiplet. High-resolution mass spectra (HRMS) were recorded on an AB SCIEX Triple ESI-TOF 5600+ mass spectrometer. The electrochemical measurements were carried out on a CS2350M electrochemical workstation (Wuhan Corrtest Instrument Co., Ltd). The 30 W blue LED lamp ( $\lambda_{\text{max}} = 445 \text{ nm}$ ) was manufactured by Hongye Photoelectricity Co., Ltd. Photo reactions were carried out in 20 mL reaction tubes at the distance of 2.0 cm from the LED lamp. In addition, an electronic fan was also equipped to maintain the reaction temperature in a range of 25–30 °C.

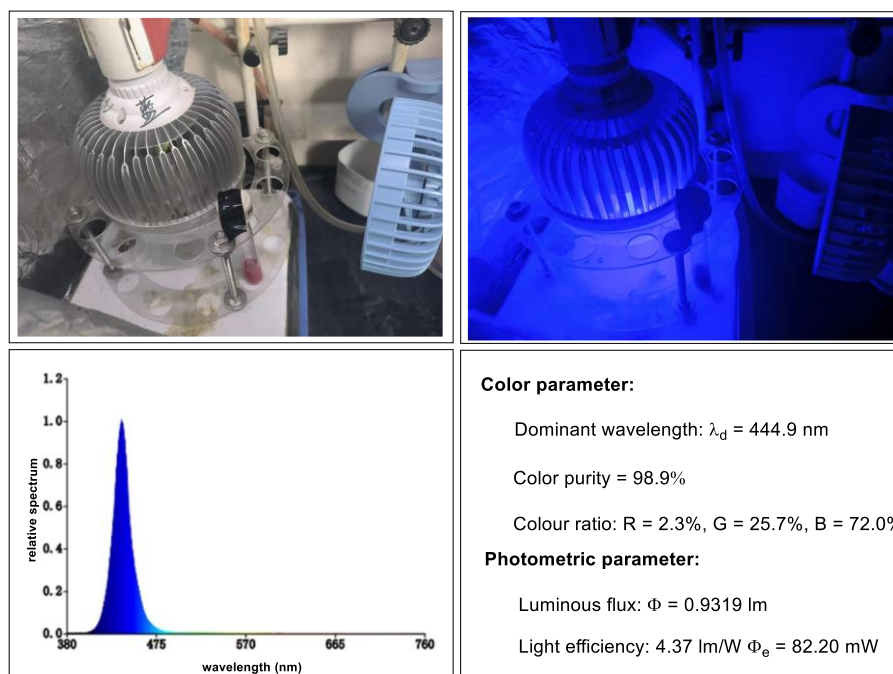

**Figure S1.** The spectrum of the lamp and the visible-light irradiation instrument

## 2. General procedures for photoredox/Cu dual catalyzed 1,4-cyanosulfonylation enabled by remote cyano migration

### 2.1 General procedure for the preparation of substrates 1<sup>[1]</sup>

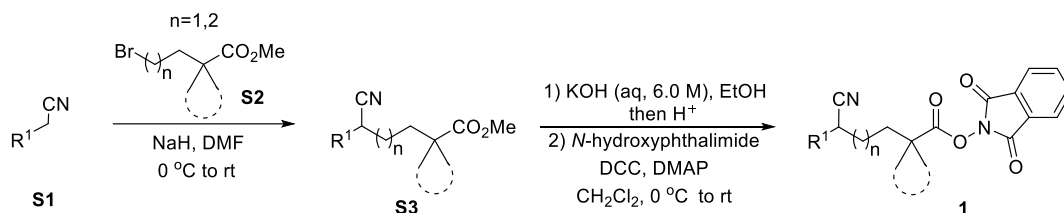

Under nitrogen atmosphere, to the suspension of NaH (15 mmol, 1.5 equiv.) in dry DMF (10 mL) S1 was added dropwise (10 mmol, in 5.0 mL DMF, 1.0 equiv.) at 0 °C in an ice-water bath. After stirring for 1 h at the same temperature, S2 (20 mmol, 2.0 equiv.) was added dropwise *via* a syringe at 0 °C. Then the reaction mixture was warmed to room temperature, stirred for 16 h, quenched with saturated aq. NH<sub>4</sub>Cl (10 mL), and extracted with ethyl acetate (15 mL×3). The combined organic layers were washed with brine (20 mL), dried over Na<sub>2</sub>SO<sub>4</sub>, and concentrated under reduced pressure. The resulting residue was purified by column chromatography on silica gel with petroleum ether/ethyl acetate as eluent to afford S3 for the next step reaction.

To a round-bottomed flask equipped with a magnetic stir bar were added S3 (5.0 mmol) and EtOH (10 mL). Then the KOH solution (2.5 mL, aq. 6.0 M, 3.0 equiv) was added dropwise, and the reaction mixture was stirred at rt for 12 h. After that, the reaction mixture was brought to pH = 2~4 with HCl (1.0 M), and extracted with EtOAc (10 mL×3). The combined organic layers were washed with brine (10 mL), dried over Na<sub>2</sub>SO<sub>4</sub>, and concentrated under reduced pressure. The residue was purified by flash column chromatography on silica gel to afford the corresponding alkyl carboxylic acid.

To a solution of alkyl carboxylic acid (1.0 equiv.), *N,N*-dimethylpyridin-4-amine (DMAP, 10 mol%), and *N*-hydroxyphthalimide (1.5 equiv.) in dry CH<sub>2</sub>Cl<sub>2</sub> (0.1 M) was added a solution of *N,N*-dicyclohexylcarbodiimide (DCC, 1.5 equiv.) in CH<sub>2</sub>Cl<sub>2</sub> (0.4 M) in an ice-water bath. Then, the reaction mixture was stirred for 12 h at room temperature. After the completion of reaction, the organic solvent was removed by rotary evaporator under vacuum, and the residue was purified by flash column chromatography on silica

gel (petroleum ether/ethyl acetate = 5:1, V/V) to afford substrates **1**.

## 2.2 General procedure for the synthesis of sodium arylsulfonates<sup>[2]</sup>

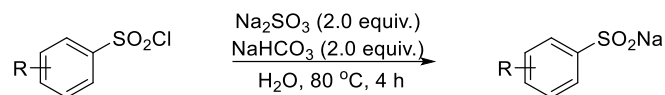

To a 100 mL oven-dried round-bottomed flask equipped with a stirring bar was charged with aromatic (heteroaromatic) sulfonyl chloride (5.0 mmol), sodium sulfite (10 mmol), sodium bicarbonate (10 mmol) and H<sub>2</sub>O (10 mL). After refluxing for 4 hours, the reaction mixture was concentrated in *vacuo*. The observed white solid was stirred with EtOH (10 mL) for 1 h, then the mixture was filtered through a pad of silica gel and rinsed with EtOH. The filtrate was concentrated under reduced pressure to afford substrates **2** without further purification.

## 2.3 General procedure for photoredox/Cu dual catalyzed 1,4-cyanosulfonylation of NHPI esters

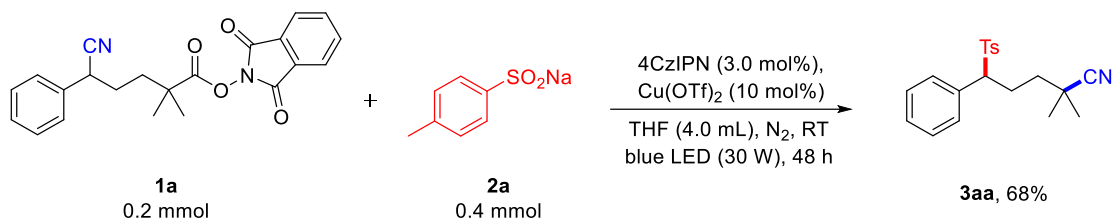

To a 20 mL test tube flask equipped with a stirring bar was charged with **1a** (0.2 mmol, 75.3 mg), 4CzIPN (3.0 mol%, 4.8 mg), Cu(OTf)<sub>2</sub> (10 mol%, 7.2 mg) and **2a** (0.4 mmol, 77.7 mg). The mixture was degassed by three freeze-pump-thaw cycles and finally backfilled with nitrogen. Then, dry THF (4.0 mL) was added in one portion *via* a syringe. The reaction mixture was irradiated with a 30 W blue LED lamp and stirred at room temperature under nitrogen atmosphere for 48 h. After removed the solvent in *vacuo*, the mixture was dissolved in EtOH (2.0 mL) with 0.2 mmol hydrazinium hydroxide solution and refluxed for 2 h. Then the residue was further purified by flash chromatography (silica gel, petroleum ether/ethyl acetate = 10:1, V/V) to give the product **3aa** (46.5 mg, 68%).

## 2.4 Procedure for a 1.0 mmol scale reaction

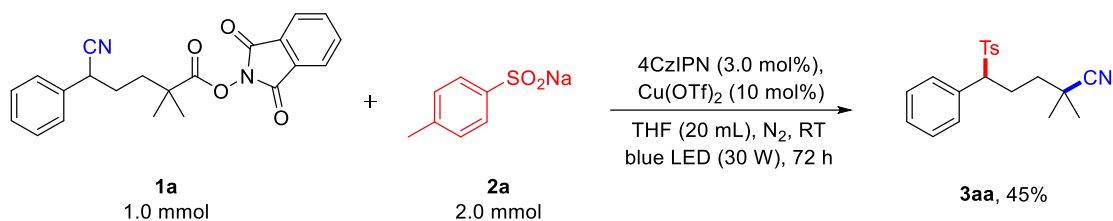

To a 20 mL test tube flask equipped with a stirring bar was charged with **1a** (1.0 mmol, 346.4 mg), 4CzIPN (3.0 mol%, 23.7 mg), Cu(OTf)<sub>2</sub> (10 mol%, 36.2 mg) and **2a** (2.0 mmol, 178.2 mg). The mixture was degassed by three freeze-pump-thaw cycles and finally backfilled with nitrogen. Then, dry THF (10 mL) was added in one portion *via* a syringe. The reaction mixture was irradiated with a 30 W blue LED lamp and stirred at room temperature under nitrogen atmosphere for 72 h. After removed the solvent in vacuo, the mixture was dissolved in EtOH (2.0 mL) with 0.2 mmol hydrazinium hydroxide solution and refluxed for 2 h. Then the residue was further purified by flash chromatography (silica gel, petroleum ether/ethyl acetate = 10:1, V/V) to give the product **3aa** (154.0 mg, 45%).

## 3. X-Ray single crystal diffraction analysis of the product **3aa** (CCDC: 2348540)

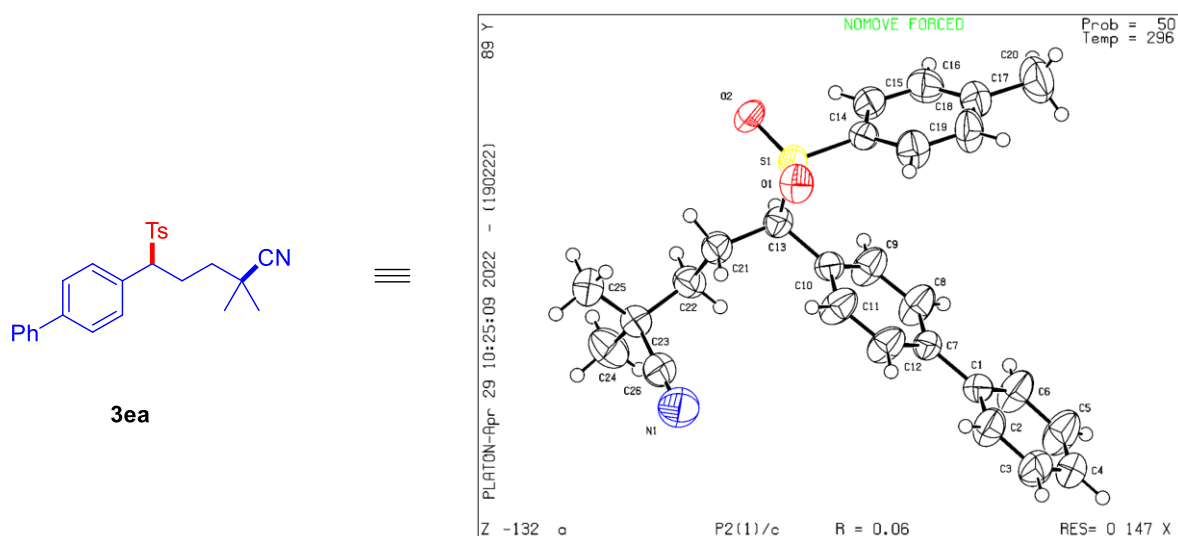



## 4. Derivatizations of product 3aa

### 4.1 The procedure for the 3aa to a Boc-protected amine 4<sup>[3]</sup>

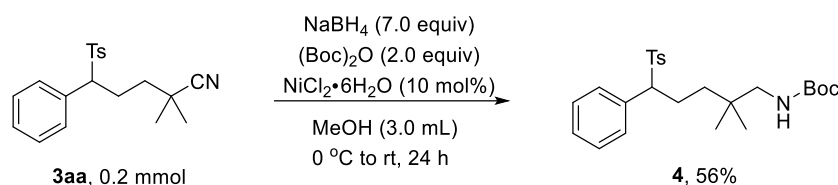

To a reaction tube equipped with a magnetic stir bar were added **3aa** (68.3 mg, 0.20 mmol) and dry methanol (3.0 mL). The reaction was cooled to 0 °C, and Boc<sub>2</sub>O (87.3 mg, 0.40 mmol) and NiCl<sub>2</sub>·6H<sub>2</sub>O (3.0 mg, 10 mol%) were added. NaBH<sub>4</sub> (53.0 mg, 1.4 mmol) was then added in small portions. The resulting reaction mixture was allowed to warm to room temperature and stirred for 24 h. The reaction was quenched with H<sub>2</sub>O and washed with ethyl acetate (5.0 mL×3). The combined organic layers were washed with brine (10 mL), dry over Na<sub>2</sub>SO<sub>4</sub>, and then concentrated in *vacuo*. The residue was purified by column chromatography on silica gel (eluent: petroleum ether/ethyl acetate = 20:1) to give **4** (50.0 mg, 56%).

### 4.2 The procedure for the reduction of 3aa to aldehyde 5<sup>[4]</sup>

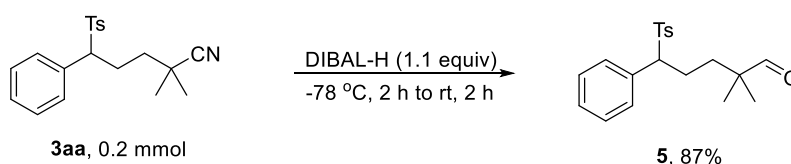

The **3aa** (68.3 mg, 0.20 mmol) was dissolved in DCM (2.0 mL), the DIBAL-H (1.0 M in cyclohexane; 1.2 equiv) was added dropwise at -78 °C. The reaction mixture was stirred at -78 °C for 2 h and room temperature for another 2 h. Then the reaction mixture was cooled to 0 °C before the slow addition of 15% aqueous HCl and stirred overnight. The mixture was extracted three times with DCM (5.0 mL). The combined extracts were washed with brine (10 mL) and dried over anhydrous Na<sub>2</sub>SO<sub>4</sub>. The solvents were removed in *vacuo* and the crude residue was purified by flash column chromatography (eluent: petroleum ether/ethyl acetate = 10:1) to give **5** (60.0 mg, 87%).

## 5. Mechanistic studies

### 5.1 Radical-trapping experiment

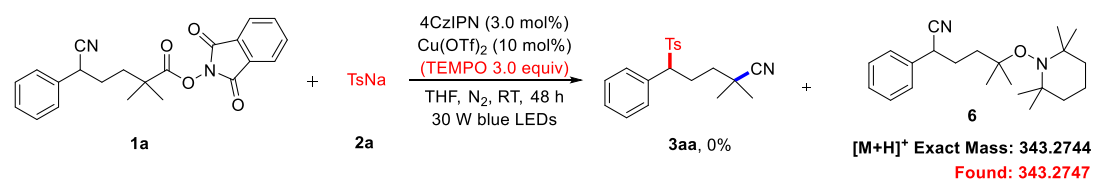

To a reaction tube equipped with a magnetic stir bar were added substrate **1a** (75.3 mg, 0.20 mmol), **2a** (77.7 mg, 0.4 mmol), 4CzIPN (4.8 mg, 3.0 mol%), Cu(OTf)<sub>2</sub> (7.2 mg, 10 mol%) and TEMPO (93.8 mg, 0.6 mmol). The mixture was degassed by three freeze-pump-thaw cycles and finally backfilled with nitrogen. Then, dry THF (2.0 mL) was added in one portion *via* a syringe. The reaction mixture was irradiated with a 30 W blue LED lamp and stirred at room temperature under nitrogen atmosphere for 48 h. Thin-layer chromatography (TLC) analysis indicated that the formation of product **3aa** was not observed, and their corresponding adduct was detected by HRMS analysis (Figure S2).

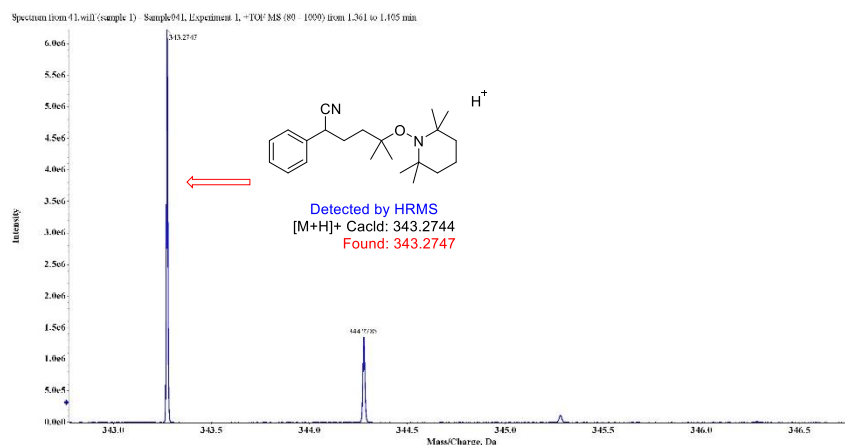

Figure S2. HRMS analysis of the adduct with TEMPO

### 5.2 Light on/off experiment

To a reaction tube equipped with a magnetic stir bar were added substrate **1a** (0.20 mmol), **2a** (0.40 mmol), 4CzIPN (4.8 mg, 0.0060 mmol). The mixture was degassed by three freeze-pump-thaw cycles and finally backfilled with nitrogen. Then, THF (4.0 mL) was added in one portion *via* a syringe. The reaction mixture was stirred at rt under nitrogen atmosphere with the light turned on and off at intervals, and the yields were



determined by  $^1\text{H}$  NMR with 1,3,5-trimethoxybenzene as an internal standard.

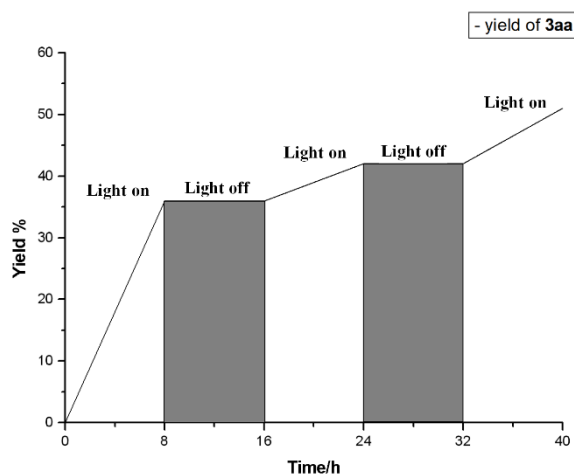

**Figure S3.** Reaction profile with the light on/off over time.

### 5.3 Cyclic voltammetry experiment

Cyclic Voltammetry was performed on a CS2350M electrochemical workstation (Wuhan Corrtest Instrument Co., Ltd). CV measurement of substrate **1a** (1.0 mM) was carried out in 0.10 M of  $\text{Bu}_4\text{NPF}_6/\text{MeCN}$  at a scan rate of 50 mV/s with the protection of  $\text{N}_2$ . The working electrode is a glassy carbon, the counter electrode is a Pt wire, and the reference electrode is Ag/AgCl (3.5 M KCl). The reduction peak of **1a** ( $E_{1/2}(\mathbf{1a}/\mathbf{1a}^{\cdot-}) = -1.21$  V vs SCE) was showed in Figure S4.

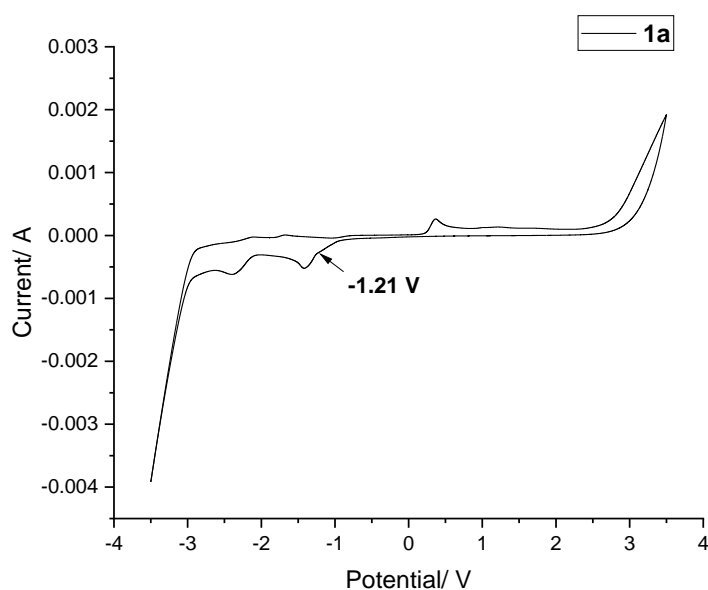

**Figure S4.** Cyclic voltammogram of **1a**

## 5.4 Stern-Volmer fluorescence quenching experiments

The luminescence quenching experiment was taken using a FluoroMax-4 Spectrophotometer. The experiments were carried out in  $6.25 \times 10^{-4}$  mol/L of 4CzIPN in THF at rt. The excitation wavelength was 384 nm and the emission intensity was collected at 560 nm (Note: Due to the poor solubility of sodium 4-methylbenzenesulfinate in THF, 4-methylbenzenesulfinic acid (4-MeC<sub>6</sub>H<sub>4</sub>SO<sub>2</sub>H) was used as the quencher instead).

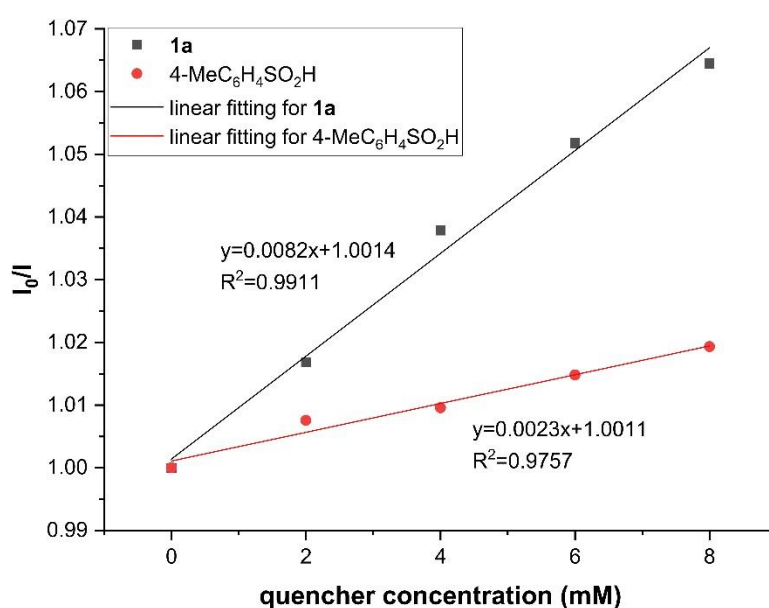

Figure S5 Emission quenching experiments with **1a** and 4-MeC<sub>6</sub>H<sub>4</sub>SO<sub>2</sub>H as quenchers

## 6. Characterization data

### 2,2-Dimethyl-5-phenyl-5-tosylpentanenitrile (**3aa**)

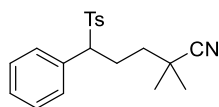

Colorless oil; <sup>1</sup>H NMR (500 MHz, CDCl<sub>3</sub>) δ 7.37 – 7.35 (m, 2H), 7.32 – 7.29 (m, 1H), 7.25 – 7.23 (m, 2H), 7.17 – 7.15 (m, 2H), 7.09 – 7.07 (m, 2H), 4.00 (dd, *J* = 11.0, 3.5 Hz, 1H), 2.65 – 2.60 (m, 1H), 2.38 (s, 3H), 2.33 – 2.25 (m, 1H), 1.53 (td, *J* = 12.5, 4.5 Hz, 1H), 1.38 (td, *J* = 13.0, 4.0 Hz, 1H), 1.33 (s, 3H), 1.30 (s, 3H); <sup>13</sup>C NMR (126 MHz, CDCl<sub>3</sub>) δ 144.7, 133.8, 131.8, 129.7, 129.3, 129.1, 129.0, 128.6, 124.4, 71.0, 38.1, 32.0, 26.6, 26.2, 23.5, 21.6. HRMS(ESI) *m/z*: [M+H]<sup>+</sup> calcd. for C<sub>20</sub>H<sub>24</sub>NO<sub>2</sub>S 342.1522,

found 342.1520.

**2,2-Dimethyl-5-(*p*-tolyl)-5-tosylpentanenitrile (3ba)**

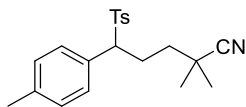

White solid, m.p. 152.9 – 154.6 °C; <sup>1</sup>H NMR (400 MHz, CDCl<sub>3</sub>) δ 7.42 – 7.40 (m, 2H), 7.29 – 7.26 (m, 1H), 7.22 – 7.20 (m, 2H), 7.10 – 7.08 (m, 2H), 7.00 – 6.98 (m, 2H), 4.00 (dd, *J* = 11.2, 4.0 Hz, 1H), 2.66 – 2.57 (m, 1H), 2.42 (s, 3H), 2.35 (s, 3H), 2.33 – 2.23 (m, 1H), 1.53 (td, *J* = 13.2, 4.8 Hz, 1H), 1.41 (td, *J* = 12.8, 4.0 Hz, 1H), 1.35 (s, 3H), 1.32 (s, 3H); <sup>13</sup>C NMR (101 MHz, CDCl<sub>3</sub>) δ 144.6, 138.9, 133.9, 129.6, 129.34, 129.28, 129.1, 128.3, 124.0, 70.7, 38.0, 32.0, 26.5, 26.2, 23.6, 21.6, 21.2. HRMS(ESI) *m/z*: [M+H]<sup>+</sup> calcd. for C<sub>21</sub>H<sub>26</sub>NO<sub>2</sub>S 356.1679, found 356.1684.

**5-(4-Methoxyphenyl)-2,2-dimethyl-5-tosylpentanenitrile (3ca)**

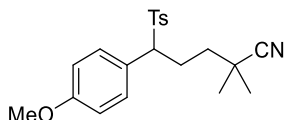

Colorless oil; <sup>1</sup>H NMR (500 MHz, CDCl<sub>3</sub>) δ 7.38 – 7.36 (m, 2H), 7.19 – 7.17 (m, 2H), 7.00 – 6.98 (m, 2H), 6.78 – 6.76 (m, 2H), 3.95 (dd, *J* = 11.5, 4.0 Hz, 1H), 3.78 (s, 3H), 2.62 – 2.55 (m, 1H), 2.38 (s, 3H), 2.26 – 2.18 (m, 1H), 1.50 (td, *J* = 13.5, 5.0 Hz, 1H), 1.38 (td, *J* = 12.5, 4.0 Hz, 1H), 1.32 (s, 3H), 1.29 (s, 3H); <sup>13</sup>C NMR (126 MHz, CDCl<sub>3</sub>) δ 160.0, 144.6, 133.9, 130.9, 129.3, 129.1, 127.1, 124.4, 114.0, 70.3, 55.3, 38.0, 32.0, 26.6, 26.2, 23.6, 21.6. HRMS(ESI) *m/z*: [M+H]<sup>+</sup> calcd. for C<sub>21</sub>H<sub>26</sub>NO<sub>3</sub>S 372.1628, found 372.1636.

**5-(4-(Tert-butyl)phenyl)-2,2-dimethyl-5-tosylpentanenitrile (3da)**

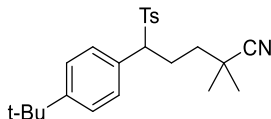

Colorless oil; <sup>1</sup>H NMR (500 MHz, CDCl<sub>3</sub>) δ 7.35 – 7.33 (m, 2H), 7.26 – 7.24 (m, 2H), 7.15 – 7.13 (m, 2H), 7.00 – 6.98 (m, 2H), 3.98 (dd, *J* = 11.0, 4.0 Hz, 1H), 2.60 – 2.53 (m, 1H), 2.38 (s, 3H), 2.31 – 2.23 (m, 1H), 1.50 (td, *J* = 13.5, 5.0 Hz, 1H), 1.38 (td, *J* = 12.5, 4.0 Hz, 1H), 1.33 (s, 3H), 1.30 (s, 3H), 1.29 (s, 9H); <sup>13</sup>C NMR (126 MHz, CDCl<sub>3</sub>) δ 152.2, 144.5, 133.9, 129.3, 129.2, 129.1, 128.5, 125.5, 124.4, 70.8, 38.0, 34.6, 32.0,

31.2, 26.5, 26.2, 23.4, 21.6. HRMS(ESI)  $m/z$ :  $[M+H]^+$  calcd. for  $C_{24}H_{32}NO_2S$  398.2148, found 398.2155.

### 5-([1,1'-Biphenyl]-4-yl)-2,2-dimethyl-5-tosylpentanenitrile (3ea)

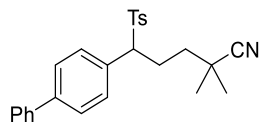

White solid, m.p. 146.9 – 148.5 °C;  $^1H$  NMR (500 MHz,  $CDCl_3$ )  $\delta$  7.58 – 7.57 (m, 2H), 7.51 – 7.49 (m, 2H), 7.46 – 7.41 (m, 4H), 7.38 – 7.35 (m, 1H), 7.19 – 7.15 (m, 4H), 4.07 (dd,  $J = 11.0, 4.0$  Hz, 1H), 2.68 – 2.61 (m, 1H), 2.39 (s, 3H), 2.36 – 2.28 (m, 1H), 1.59 – 1.53 (m, 1H), 1.47 – 1.41 (m, 1H), 1.35 (s, 3H), 1.32 (s, 3H);  $^{13}C$  NMR (126 MHz,  $CDCl_3$ )  $\delta$  144.7, 141.7, 140.0, 134.7, 133.8, 130.7, 130.1, 129.4, 129.1, 128.9, 127.7, 127.2, 124.4, 70.7, 38.0, 32.1, 26.6, 26.2, 23.6, 21.6. HRMS(ESI)  $m/z$ :  $[M+H]^+$  calcd. for  $C_{26}H_{28}NO_2S$  418.1835, found 418.1841.

### 5-(4-Fluorophenyl)-2,2-dimethyl-5-tosylpentanenitrile (3fa)

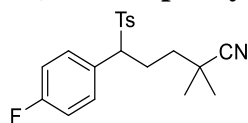

Colorless oil;  $^1H$  NMR (500 MHz,  $CDCl_3$ )  $\delta$  7.38 – 7.36 (m, 2H), 7.20 – 7.18 (m, 2H), 7.08 – 7.04 (m, 2H), 6.97 – 6.93 (m, 2H), 4.00 (dd,  $J = 11.0, 4.0$  Hz, 1H), 2.66 – 2.59 (m, 1H), 2.39 (s, 3H), 2.27 – 2.19 (m, 1H), 1.56 – 1.49 (m, 1H), 1.39 – 1.36 (m, 1H), 1.33 (s, 3H), 1.30 (s, 3H);  $^{19}F$  NMR (471 MHz,  $CDCl_3$ )  $\delta$  -111.8;  $^{13}C$  NMR (126 MHz,  $CDCl_3$ )  $\delta$  163.1 (d,  $J = 247.8$  Hz), 145.0, 133.8, 131.6 (d,  $J = 8.3$  Hz), 129.6, 129.2, 127.9 (d,  $J = 3.0$  Hz), 124.4, 115.9 (d,  $J = 21.5$  Hz), 70.3, 38.2, 32.2, 26.8, 26.3, 23.8, 21.8. HRMS(ESI)  $m/z$ :  $[M+H]^+$  calcd. for  $C_{20}H_{23}FNO_2S$  360.1428, found 360.1425.

### 5-(4-Chlorophenyl)-2,2-dimethyl-5-tosylpentanenitrile (3ga)

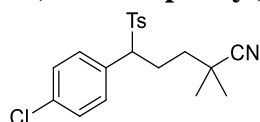

Colorless oil;  $^1H$  NMR (500 MHz,  $CDCl_3$ )  $\delta$  7.39 – 7.38 (m, 2H), 7.24 – 7.23 (m, 2H), 7.21 – 7.19 (m, 2H), 7.04 – 7.02 (m, 2H), 3.99 (dd,  $J = 11.0, 4.0$  Hz, 1H), 2.64 – 2.57 (m, 1H), 2.40 (s, 3H), 2.26 – 2.18 (m, 1H), 1.51 (td,  $J = 12.5, 5.0$  Hz, 1H), 1.34 (td,  $J =$

13.0, 4.0 Hz, 1H), 1.32 (s, 3H), 1.29 (s, 3H);  $^{13}\text{C}$  NMR (126 MHz,  $\text{CDCl}_3$ )  $\delta$  145.0, 135.1, 133.6, 130.9, 130.5, 129.5, 129.0, 128.9, 124.2, 70.2, 38.0, 32.0, 26.6, 26.2, 23.7, 21.6. HRMS(ESI)  $m/z$ :  $[\text{M}+\text{H}]^+$  calcd. for  $\text{C}_{20}\text{H}_{23}\text{ClNO}_2\text{S}$  376.1133, found 376.1135.

### 2,2-Dimethyl-5-tosyl-5-(4-(trifluoromethyl)phenyl)pentanenitrile (3ha)

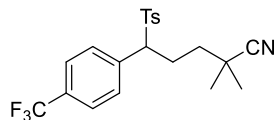

White solid, m.p. 135.4 – 137.1 °C;  $^1\text{H}$  NMR (500 MHz,  $\text{CDCl}_3$ )  $\delta$  7.53 – 7.52 (m, 2H), 7.40 – 7.38 (m, 2H), 7.25 – 7.23 (m, 2H), 7.21 – 7.19 (m, 2H), 4.09 (dd,  $J = 11.0, 4.0$  Hz, 1H), 2.67 – 2.60 (m, 1H), 2.40 (s, 3H), 2.33 – 2.24 (m, 1H), 1.57 – 1.51 (m, 1H), 1.37 – 1.34 (m, 1H), 1.33 (s, 3H), 1.30 (s, 3H);  $^{19}\text{F}$  NMR (471 MHz,  $\text{CDCl}_3$ )  $\delta$  -62.8;  $^{13}\text{C}$  NMR (126 MHz,  $\text{CDCl}_3$ )  $\delta$  145.2, 136.1, 133.6, 131.2 (q,  $J = 32.9$  Hz), 130.1, 129.5, 129.0, 125.6 (q,  $J = 3.7$  Hz), 124.2, 123.7 (q,  $J = 273.0$  Hz), 70.5, 38.0, 32.0, 26.5, 26.2, 23.8, 21.6. HRMS(ESI)  $m/z$ :  $[\text{M}+\text{H}]^+$  calcd. for  $\text{C}_{21}\text{H}_{23}\text{F}_3\text{NO}_2\text{S}$  410.1396, found 410.1398.

### 5-(3,5-Dimethylphenyl)-2,2-dimethyl-5-tosylpentanenitrile (3ia)

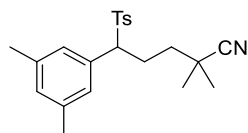

White solid, m.p. 144.1 – 145.7 °C;  $^1\text{H}$  NMR (500 MHz,  $\text{CDCl}_3$ )  $\delta$  7.39 – 7.37 (m, 2H), 7.18 – 7.16 (m, 2H), 6.90 (br, 1H), 6.64 (br, 2H), 3.91 (dd,  $J = 11.0, 4.0$  Hz, 1H), 2.57 – 2.50 (m, 1H), 2.37 (s, 3H), 2.28 – 2.22 (m, 1H), 2.19 (s, 6H), 1.50 (td,  $J = 13.5, 5.0$  Hz, 1H), 1.39 (td,  $J = 13.0, 4.5$  Hz, 1H), 1.30 (s, 3H), 1.28 (s, 3H);  $^{13}\text{C}$  NMR (126 MHz,  $\text{CDCl}_3$ )  $\delta$  144.4, 138.0, 133.9, 131.4, 130.5, 129.09, 129.06, 127.4, 124.3, 71.0, 38.0, 32.0, 26.5, 26.1, 23.5, 21.4, 21.0. HRMS(ESI)  $m/z$ :  $[\text{M}+\text{H}]^+$  calcd. for  $\text{C}_{22}\text{H}_{28}\text{NO}_2\text{S}$  370.1835, found 370.1838.

### 5-(3-Fluorophenyl)-2,2-dimethyl-5-tosylpentanenitrile (3ja)

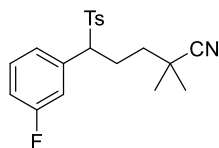

Colorless oil;  $^1\text{H}$  NMR (500 MHz,  $\text{CDCl}_3$ )  $\delta$  7.41 – 7.39 (m, 2H), 7.24 – 7.21 (m, 1H), 7.20 – 7.19 (m, 2H), 7.02 – 6.98 (m, 1H), 6.88 – 6.87 (m, 1H), 6.84 – 6.81 (m, 1H), 4.00 (dd,  $J = 11.0, 4.0$  Hz, 1H), 2.65 – 2.58 (m, 1H), 2.39 (s, 3H), 2.28 – 2.20 (m, 1H), 1.57 – 1.51 (m, 1H), 1.42 – 1.35 (m, 1H), 1.33 (s, 3H), 1.31 (s, 3H);  $^{19}\text{F}$  NMR (471 MHz,  $\text{CDCl}_3$ )  $\delta$  -111.7;  $^{13}\text{C}$  NMR (126 MHz,  $\text{CDCl}_3$ )  $\delta$  162.6 (d,  $J = 248.1$  Hz), 145.0, 134.4 (d,  $J = 7.4$  Hz), 133.6, 130.2 (d,  $J = 8.2$  Hz), 129.5, 129.0, 125.4 (d,  $J = 2.8$  Hz), 124.3, 116.6 (d,  $J = 22.4$  Hz), 116.0 (d,  $J = 21.0$  Hz), 70.5, 38.0, 32.0, 26.5, 26.2, 23.7, 21.6. HRMS(ESI)  $m/z$ :  $[\text{M}+\text{H}]^+$  calcd. for  $\text{C}_{20}\text{H}_{23}\text{FNO}_2\text{S}$  360.1428, found 360.1432.

### 2,2-Dimethyl-5-(naphthalen-2-yl)-5-tosylpentanenitrile (3ka)

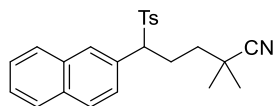

White wax;  $^1\text{H}$  NMR (500 MHz,  $\text{CDCl}_3$ )  $\delta$  7.82 – 7.81 (m, 1H), 7.76 – 7.74 (m, 1H), 7.71 – 7.70 (m, 1H), 7.52 – 7.51 (m, 1H), 7.50 – 7.46 (m, 2H), 7.39 – 7.37 (m, 2H), 7.25 – 7.23 (m, 1H), 7.13 – 7.11 (m, 2H), 4.18 (dd,  $J = 11.0, 4.0$  Hz, 1H), 2.73 – 2.66 (m, 1H), 2.44 – 2.39 (m, 1H), 2.35 (s, 3H), 1.57 – 1.52 (m, 1H), 1.42 – 1.35 (m, 1H), 1.32 (s, 3H), 1.29 (s, 3H);  $^{13}\text{C}$  NMR (126 MHz,  $\text{CDCl}_3$ )  $\delta$  144.9, 134.1, 133.5, 133.1, 129.9, 129.51, 129.46, 129.3, 128.7, 128.2, 127.8, 126.9, 126.6, 126.5, 123.9, 71.4, 38.3, 32.2, 26.7, 26.4, 24.0, 21.7. HRMS(ESI)  $m/z$ :  $[\text{M}+\text{H}]^+$  calcd. for  $\text{C}_{24}\text{H}_{26}\text{NO}_2\text{S}$  392.1679, found 392.1681.

### 2,2-Dimethyl-5-(thiophen-2-yl)-5-tosylpentanenitrile (3la)

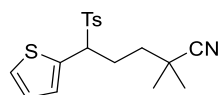

Light yellow oil;  $^1\text{H}$  NMR (500 MHz,  $\text{CDCl}_3$ )  $\delta$  7.46 – 7.44 (m, 2H), 7.28 – 7.27 (m, 1H), 7.21 – 7.20 (m, 2H), 6.91 – 6.89 (m, 1H), 6.81 – 6.80 (m, 1H), 4.29 (dd,  $J = 11.0, 4.0$  Hz, 1H), 2.69 – 2.62 (m, 1H), 2.40 (s, 3H), 2.23 – 2.15 (m, 1H), 1.62 – 1.48 (m, 2H), 1.33 (s, 3H), 1.32 (s, 3H);  $^{13}\text{C}$  NMR (126 MHz,  $\text{CDCl}_3$ )  $\delta$  144.9, 134.0, 133.4,

129.4, 129.2, 129.0, 127.1, 127.0, 124.3, 66.5, 37.9, 32.0, 26.4, 26.3, 25.2, 21.6.  
HRMS(ESI) m/z:  $[M+H]^+$  calcd. for  $C_{18}H_{22}NO_2S_2$  348.1086, found 348.1082.

### 5-Phenyl-5-tosylpentanenitrile (3ma)

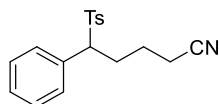

Colorless oil;  $^1H$  NMR (500 MHz,  $CDCl_3$ )  $\delta$  7.38 – 7.36 (m, 2H), 7.32 – 7.29 (m, 1H), 7.26 – 7.23 (m, 2H), 7.17 – 7.16 (m, 2H), 7.10 – 7.08 (m, 2H), 4.02 (dd,  $J = 11.0, 4.0$  Hz, 1H), 2.58 – 2.51 (m, 1H), 2.38 (s, 3H), 2.35 – 2.31 (m, 2H), 2.30 – 2.24 (m, 1H), 1.73 – 1.63 (m, 2H);  $^{13}C$  NMR (126 MHz,  $CDCl_3$ )  $\delta$  144.7, 133.9, 131.7, 129.6, 129.3, 129.1, 129.0, 128.7, 118.9, 70.7, 26.9, 23.1, 21.6, 17.0. HRMS(ESI) m/z:  $[M+H]^+$  calcd. for  $C_{18}H_{20}NO_2S$  314.1209, found 314.1215.

### 1-(3-Phenyl-3-tosylpropyl)cyclopentane-1-carbonitrile (3na)

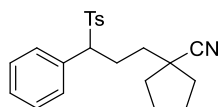

White solid, m.p. 142.8 – 144.1 °C;  $^1H$  NMR (500 MHz,  $CDCl_3$ )  $\delta$  7.37 – 7.35 (m, 2H), 7.32 – 7.29 (m, 1H), 7.25 – 7.23 (m, 2H), 7.17 – 7.16 (m, 2H), 7.10 – 7.08 (m, 2H), 4.02 (dd,  $J = 11.0, 4.5$  Hz, 1H), 2.67 – 2.60 (m, 1H), 2.38 (s, 3H), 2.36 – 2.28 (m, 1H), 2.15 – 2.09 (m, 2H), 1.84 – 1.80 (m, 2H), 1.72 – 1.68 (m, 2H), 1.57 – 1.51 (m, 2H), 1.49 – 1.43 (m, 2H);  $^{13}C$  NMR (126 MHz,  $CDCl_3$ )  $\delta$  144.6, 133.8, 131.9, 129.7, 129.3, 129.1, 128.9, 128.6, 124.6, 71.0, 42.8, 38.1, 37.8, 35.7, 24.7, 24.1, 24.0, 21.6. HRMS(ESI) m/z:  $[M+H]^+$  calcd. for  $C_{22}H_{26}NO_2S$  368.1679, found 368.1681.

### 2-(2-methyl-5-phenyl-5-tosylpentan-2-yl)benzo[d]thiazole (3pa)

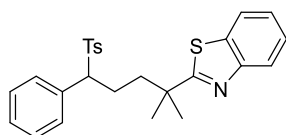

Colorless oil;  $^1H$  NMR (500 MHz,  $CDCl_3$ )  $\delta$  7.95 – 7.93 (m, 1H), 7.85 – 7.83 (m, 1H), 7.48 – 7.44 (m, 1H), 7.37 – 7.34 (m, 1H), 7.30 – 7.28 (m, 3H), 7.22 – 7.19 (m, 2H), 7.06 – 7.04 (m, 2H), 7.02 – 7.01 (m, 2H), 3.93 (dd,  $J = 11.5, 3.5$  Hz, 1H), 2.38 – 2.35 (m, 1H), 2.32 (s, 3H), 2.16 – 2.07 (m, 1H), 1.78 (td,  $J = 13.0, 4.5$  Hz, 1H), 1.46 (s, 3H),

1.44 (s, 3H);  $^{13}\text{C}$  NMR (126 MHz,  $\text{CDCl}_3$ )  $\delta$  179.8, 153.0, 144.3, 134.8, 134.1, 131.9, 129.9, 129.1, 128.9, 128.7, 128.4, 125.8, 124.7, 122.7, 121.5, 71.6, 41.2, 40.6, 28.4, 22.9, 21.6. HRMS(ESI)  $m/z$ :  $[\text{M}+\text{H}]^+$  calcd. for  $\text{C}_{26}\text{H}_{27}\text{NO}_2\text{S}_2$  450.1556, found 450.1561.

### 2,2-Dimethyl-5-phenyl-5-(phenylsulfonyl)pentanenitrile (3ab)

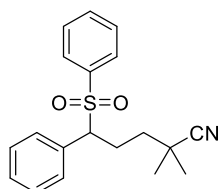

White solid, m.p. 123.5 – 125.2 °C;  $^1\text{H}$  NMR (500 MHz,  $\text{CDCl}_3$ )  $\delta$  7.55 – 7.52 (m, 1H), 7.50 – 7.49 (m, 2H), 7.39 – 7.35 (m, 2H), 7.31 – 7.28 (m, 1H), 7.25 – 7.22 (m, 2H), 7.08 – 7.07 (m, 2H), 4.03 (dd,  $J = 11.0, 4.5$  Hz, 1H), 2.68 – 2.61 (m, 1H), 2.35 – 2.27 (m, 1H), 1.58 – 1.52 (m, 1H), 1.43 – 1.37 (m, 1H), 1.33 (s, 3 H), 1.31 (s, 3 H);  $^{13}\text{C}$  NMR (126 MHz,  $\text{CDCl}_3$ )  $\delta$  137.1, 133.8, 131.9, 129.8, 129.2, 128.84, 128.82, 124.5, 71.2, 38.2, 32.2, 26.7, 26.4, 23.6. HRMS(ESI)  $m/z$ :  $[\text{M}+\text{H}]^+$  calcd. for  $\text{C}_{19}\text{H}_{22}\text{NO}_2\text{S}$  328.1366, found 328.1371.

### 5-((4-Methoxyphenyl)sulfonyl)-2,2-dimethyl-5-phenylpentanenitrile (3ac)

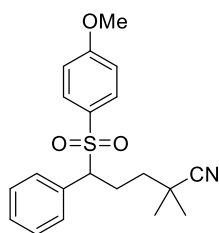

Colorless oil;  $^1\text{H}$  NMR (500 MHz,  $\text{CDCl}_3$ )  $\delta$  7.39 – 7.37 (m, 2H), 7.32 – 7.29 (m, 1H), 7.27 – 7.24 (m, 2H), 7.09 – 7.07 (m, 2H), 6.83 – 6.81 (m, 2H), 3.99 (dd,  $J = 11.0, 4.5$  Hz, 1H), 3.83 (s, 3H), 2.67 – 2.60 (m, 1H), 2.32 – 2.24 (m, 1H), 1.57 – 1.49 (m, 1H), 1.42 – 1.41 (m, 1H), 1.33 (s, 3H), 1.30 (s, 3H);  $^{13}\text{C}$  NMR (126 MHz,  $\text{CDCl}_3$ )  $\delta$  163.8, 132.2, 131.4, 129.8, 129.1, 128.8, 128.4, 124.5, 114.0, 71.3, 55.7, 38.2, 32.2, 26.7, 26.4, 23.7. HRMS(ESI)  $m/z$ :  $[\text{M}+\text{H}]^+$  calcd. for  $\text{C}_{20}\text{H}_{24}\text{NO}_3\text{S}$  358.1471, found 358.1476.

### 5-((4-Fluorophenyl)sulfonyl)-2,2-dimethyl-5-phenylpentanenitrile (3ad)



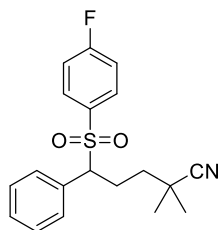

Colorless oil;  $^1\text{H}$  NMR (500 MHz,  $\text{CDCl}_3$ )  $\delta$  7.49 – 7.45 (m, 2H), 7.32 – 7.29 (m, 1H), 7.27 – 7.24 (m, 2H), 7.08 – 7.01 (m, 4H), 4.02 (dd,  $J = 11.0, 4.5$  Hz, 1H), 2.69 – 2.62 (m, 1H), 2.35 – 2.27 (m, 1H), 1.59 – 1.52 (m, 1H), 1.43 – 1.36 (m, 1H), 1.34 (s, 3H), 1.31 (s, 3H);  $^{19}\text{F}$  NMR (471 MHz,  $\text{CDCl}_3$ )  $\delta$  -103.2;  $^{13}\text{C}$  NMR (126 MHz,  $\text{CDCl}_3$ )  $\delta$  165.7 (d,  $J = 257.2$  Hz), 132.9 (d,  $J = 2.8$  Hz), 131.8 (d,  $J = 9.7$  Hz), 131.6, 129.6, 129.2, 128.8, 124.3, 116.0 (d,  $J = 22.7$  Hz), 71.2, 38.0, 32.0, 26.5, 26.2, 23.3. HRMS(ESI)  $m/z$ :  $[\text{M}+\text{H}]^+$  calcd. for  $\text{C}_{19}\text{H}_{21}\text{FNO}_2\text{S}$  346.1272, found 346.1275.

#### 5-((4-Chlorophenyl)sulfonyl)-2,2-dimethyl-5-phenylpentanenitrile (3ae)

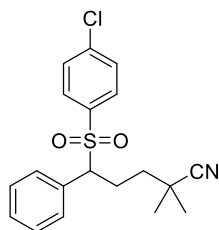

Colorless oil;  $^1\text{H}$  NMR (500 MHz,  $\text{CDCl}_3$ )  $\delta$  7.39 – 7.38 (m, 2H), 7.34 – 7.30 (m, 3H), 7.27 – 7.25 (m, 2H), 7.08 – 7.07 (m, 2H), 4.03 (dd,  $J = 11.0, 4.0$  Hz, 1H), 2.69 – 2.62 (m, 1H), 2.35 – 2.27 (m, 1H), 1.55 (td,  $J = 13.0, 4.5$  Hz, 1H), 1.39 (td,  $J = 13.0, 3.5$  Hz, 1H), 1.34 (s, 3H), 1.31 (s, 3H);  $^{13}\text{C}$  NMR (126 MHz,  $\text{CDCl}_3$ )  $\delta$  140.4, 135.3, 131.5, 130.4, 129.6, 129.2, 128.9, 128.8, 124.3, 71.1, 37.9, 32.0, 26.5, 26.2, 23.3. HRMS(ESI)  $m/z$ :  $[\text{M}+\text{H}]^+$  calcd. for  $\text{C}_{19}\text{H}_{21}\text{ClNO}_2\text{S}$  362.0976, found 362.0982.

#### 5-((4-Bromophenyl)sulfonyl)-2,2-dimethyl-5-phenylpentanenitrile (3af)

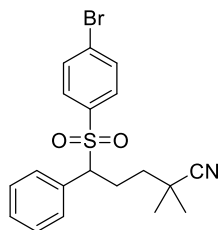

White solid, m.p. 117.2 – 119.7 °C;  $^1\text{H}$  NMR (500 MHz,  $\text{CDCl}_3$ )  $\delta$  7.51 – 7.49 (m, 2H), 7.34 – 7.30 (m, 1H), 7.28 – 7.25 (m, 2H), 7.09 – 7.07 (m, 4H), 4.02 (dd,  $J = 11.0, 4.0$  Hz, 1H), 2.69 – 2.62 (m, 1H), 2.35 – 2.27 (m, 1H), 1.58 – 1.53 (m, 1H), 1.43 – 1.37 (m, 1H), 1.34 (s, 3H), 1.31 (s, 3H);  $^{13}\text{C}$  NMR (126 MHz,  $\text{CDCl}_3$ )  $\delta$  135.9, 132.0, 131.5, 130.5, 129.6, 129.3, 129.1, 128.9, 124.3, 71.1, 38.0, 32.0, 26.5, 26.2, 23.3. HRMS(ESI)  $m/z$ :  $[\text{M}+\text{H}]^+$  calcd. for  $\text{C}_{19}\text{H}_{21}\text{BrNO}_2\text{S}$  406.0471, found 406.0473.

**2,2-Dimethyl-5-phenyl-5-((4-(trifluoromethyl)phenyl)sulfonyl)pentanenitrile**

**(3ag)**

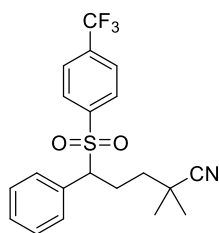

Colorless oil;  $^1\text{H}$  NMR (500 MHz,  $\text{CDCl}_3$ )  $\delta$  7.63 – 7.58 (m, 4H), 7.33 – 7.30 (m, 1H), 7.27 – 7.24 (m, 2H), 7.08 – 7.06 (m, 2H), 4.06 (dd,  $J = 11.0, 4.0$  Hz, 1H), 2.72 – 2.65 (m, 1H), 2.39 – 2.31 (m, 1H), 1.57 (td,  $J = 12.5, 5.0$  Hz, 1H), 1.41 (td,  $J = 12.5, 4.0$  Hz, 1H), 1.35 (s, 3H), 1.32 (s, 3H);  $^9\text{F}$  NMR (471 MHz,  $\text{CDCl}_3$ )  $\delta$  -63.1;  $^{13}\text{C}$  NMR (126 MHz,  $\text{CDCl}_3$ )  $\delta$  142.5, 140.6, 135.2 (q,  $J = 33.0$  Hz), 131.3, 129.6, 129.4, 128.9, 125.7 (q,  $J = 3.6$  Hz), 124.3, 123.0 (q,  $J = 271.6$  Hz), 71.2, 38.0, 32.0, 26.5, 26.3, 23.3. HRMS (ESI)  $m/z$ :  $[\text{M}+\text{H}]^+$  calcd. for  $\text{C}_{20}\text{H}_{21}\text{F}_3\text{NO}_2\text{S}$  396.1240, found 396.1243.

**2,2-Dimethyl-5-phenyl-5-((4-(trifluoromethoxy)phenyl)sulfonyl)pentanenitrile**

**(3ah)**

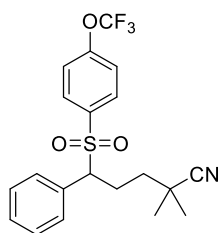

Colorless oil;  $^1\text{H}$  NMR (500 MHz,  $\text{CDCl}_3$ )  $\delta$  7.51 – 7.49 (m, 2H), 7.32 – 7.30 (m, 1H), 7.26 – 7.23 (m, 2H), 7.18 – 7.16 (m, 2H), 7.07 – 7.06 (m, 2H), 4.04 (dd,  $J = 11.0, 4.0$  Hz, 1H), 2.70 – 2.63 (m, 1H), 2.37 – 2.29 (m, 1H), 1.56 (td,  $J = 13.5, 5.0$  Hz, 1H), 1.41 (td,  $J = 12.5, 4.0$  Hz, 1H), 1.34 (s, 3H), 1.31 (s, 3H);  $^{19}\text{F}$  NMR (471 MHz,  $\text{CDCl}_3$ )  $\delta$  -57.6;  $^{13}\text{C}$  NMR (126 MHz,  $\text{CDCl}_3$ )  $\delta$  152.9, 135.1, 131.5, 131.2, 129.6, 129.3, 128.8, 124.3, 120.3, 120.0 (q,  $J = 249.4$  Hz), 71.2, 38.0, 32.0, 26.5, 26.2, 23.2. HRMS (ESI)  $m/z$ :  $[\text{M}+\text{H}]^+$  calcd. for  $\text{C}_{20}\text{H}_{21}\text{F}_3\text{NO}_3\text{S}$  412.1189, found 412.1202.

#### 4-((4-Cyano-4-methyl-1-phenylpentyl)sulfonyl)benzonitrile (3ai)

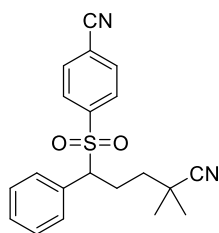

White solid, m.p. 140.2 – 141.5 °C;  $^1\text{H}$  NMR (500 MHz,  $\text{CDCl}_3$ )  $\delta$  7.65 – 7.63 (m, 2H), 7.58 – 7.56 (m, 2H), 7.34 – 7.31 (m, 1H), 7.27 – 7.24 (m, 2H), 7.07 – 7.05 (m, 2H), 4.07 (dd,  $J = 11.0, 4.0$  Hz, 1H), 2.71 – 2.64 (m, 1H), 2.38 – 2.30 (m, 1H), 1.57 (td,  $J = 13.5, 5.0$  Hz, 1H), 1.41 (td,  $J = 12.5, 4.0$  Hz, 1H), 1.34 (s, 3H), 1.31 (s, 3H);  $^{13}\text{C}$  NMR (126 MHz,  $\text{CDCl}_3$ )  $\delta$  141.3, 132.3, 131.1, 129.64, 129.58, 129.5, 129.0, 124.2, 117.3, 117.0, 71.2, 37.9, 32.0, 26.5, 26.3, 23.2. HRMS (ESI)  $m/z$ :  $[\text{M}+\text{H}]^+$  calcd. for  $\text{C}_{20}\text{H}_{21}\text{N}_2\text{O}_2\text{S}$  353.1318, found 353.1323.

#### Methyl 4-((4-cyano-4-methyl-1-phenylpentyl)sulfonyl)benzoate (3aj)

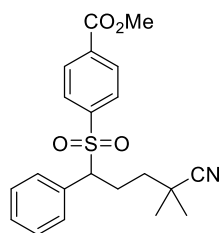

Colorless oil;  $^1\text{H}$  NMR (500 MHz,  $\text{CDCl}_3$ )  $\delta$  8.02 – 8.00 (m, 2H), 7.56 – 7.54 (m, 2H), 7.32 – 7.29 (m, 1H), 7.25 – 7.22 (m, 2H), 7.07 – 7.06 (m, 2H), 4.06 (dd,  $J = 11.0, 4.0$  Hz, 1H), 3.94 (s, 3H), 2.71 – 2.64 (m, 1H), 2.38 – 2.29 (m, 1H), 1.56 (td,  $J = 12.5, 4.5$  Hz, 1H), 1.41 (td,  $J = 12.5, 4.0$  Hz, 1H), 1.34 (s, 3H), 1.31 (s, 3H);  $^{13}\text{C}$  NMR (126 MHz,  $\text{CDCl}_3$ )  $\delta$  165.5, 141.0, 134.6, 131.3, 129.7, 129.6, 129.3, 129.1, 128.9, 124.2, 71.9, 52.7, 38.0, 32.1, 26.6, 26.2, 23.3. HRMS (ESI)  $m/z$ :  $[\text{M}+\text{K}]^+$  calcd. for  $\text{C}_{21}\text{H}_{23}\text{KNO}_4\text{S}$  424.0979, found 424.0988.

### 2,2-Dimethyl-5-phenyl-5-(*m*-tolylsulfonyl)pentanenitrile (3ak)

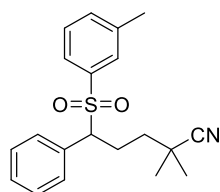

Colorless oil;  $^1\text{H}$  NMR (500 MHz,  $\text{CDCl}_3$ )  $\delta$  7.37 – 7.35 (m, 2H), 7.30 – 7.29 (m, 1H), 7.26 – 7.23 (m, 2H), 7.17 – 7.15 (m, 2H), 7.09 – 7.07 (m, 2H), 4.00 (dd,  $J = 11.0, 4.5$  Hz, 1H), 2.66 – 2.59 (m, 1H), 2.38 (s, 3H), 2.33 – 2.25 (m, 1H), 1.56 – 1.50 (m, 1H), 1.41 – 1.35 (m, 1H), 1.33 (s, 3 H), 1.30 (s, 3 H);  $^{13}\text{C}$  NMR (126 MHz,  $\text{CDCl}_3$ )  $\delta$  144.7, 139.6, 133.8, 131.8, 129.7, 129.3, 129.1, 129.0, 128.6, 125.8, 124.4, 71.0, 38.0, 32.0, 26.6, 26.2, 23.5, 21.6. HRMS(ESI)  $m/z$ :  $[\text{M}+\text{H}]^+$  calcd. for  $\text{C}_{20}\text{H}_{24}\text{NO}_2\text{S}$  342.1522, found 345.1525.

### 5-((2-Fluorophenyl)sulfonyl)-2,2-dimethyl-5-phenylpentanenitrile (3al)

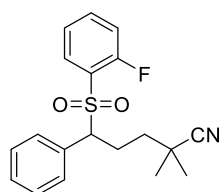

Colorless oil;  $^1\text{H}$  NMR (500 MHz,  $\text{CDCl}_3$ )  $\delta$  7.54 – 7.47 (m, 2H), 7.25 – 7.21 (m, 5H),

7.17 – 7.13 (m, 1H), 7.11 – 7.07 (m, 1H), 4.37 (dd,  $J = 11.0, 4.0$  Hz, 1H), 2.67 – 2.60 (m, 1H), 2.42 – 2.34 (m, 1H), 1.63 – 1.57 (m, 1H), 1.47 – 1.40 (m, 1H), 1.34 (s, 3 H), 1.32 (s, 3 H);  $^{19}\text{F}$  NMR (471 MHz,  $\text{CDCl}_3$ )  $\delta$  -108.3;  $^{13}\text{C}$  NMR (126 MHz,  $\text{CDCl}_3$ )  $\delta$  159.5 (d,  $J = 255.3$  Hz), 136.1 (d,  $J = 8.4$  Hz), 134.1, 131.4, 131.3, 129.3, 129.2, 128.8, 124.5 (d,  $J = 3.3$  Hz), 124.3, 116.7 (d,  $J = 21.7$  Hz), 70.2, 38.0, 32.1, 26.6, 24.1, 23.2. HRMS(ESI)  $m/z$ :  $[\text{M}+\text{H}]^+$  calcd. for  $\text{C}_{19}\text{H}_{21}\text{FNO}_2\text{S}$  358.1471, found 358.1470.

### 2,2-Dimethyl-5-(naphthalen-2-ylsulfonyl)-5-phenylpentanenitrile (3am)

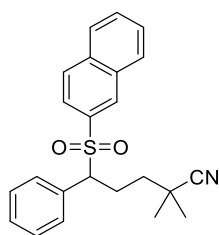

White solid, m.p. 204.9 – 206.2 °C;  $^1\text{H}$  NMR (500 MHz,  $\text{CDCl}_3$ )  $\delta$  8.06 (br, 1H), 7.87 – 7.86 (m, 1H), 7.83 – 7.79 (m, 2H), 7.66 – 7.62 (m, 1H), 7.59 – 7.56 (m, 1H), 7.44 – 7.42 (m, 1H), 7.29 – 7.27 (m, 1H), 7.21 – 7.18 (m, 2H), 7.09 – 7.07 (m, 2H), 4.11 (dd,  $J = 11.0, 4.0$  Hz, 1H), 2.75 – 2.68 (m, 1H), 2.40 – 2.32 (m, 1H), 1.61 – 1.55 (m, 1H), 1.42 (td,  $J = 13.0, 4.0$  Hz, 1H), 1.34 (s, 3 H), 1.31 (s, 3 H);  $^{13}\text{C}$  NMR (126 MHz,  $\text{CDCl}_3$ )  $\delta$  135.2, 133.9, 131.9, 131.1, 129.8, 129.4, 129.2, 129.1, 128.71, 128.68, 127.9, 127.5, 124.3, 123.6, 71.2, 38.1, 32.1, 29.7, 26.6, 26.3, 23.6. HRMS (ESI)  $m/z$ :  $[\text{M}+\text{H}]^+$  calcd. for  $\text{C}_{23}\text{H}_{24}\text{NO}_2\text{S}$  378.1522, found 378.1528.

### 5-((2,3-Dihydrobenzofuran-5-yl)sulfonyl)-2,2-dimethyl-5-phenylpentanenitrile (3an)

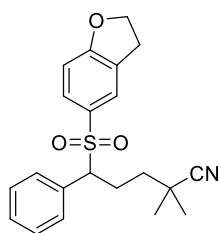

Light yellow solid, m.p. 127.2 – 128.5 °C;  $^1\text{H}$  NMR (500 MHz,  $\text{CDCl}_3$ )  $\delta$  7.31 – 7.28 (m, 1H), 7.27 – 7.23 (m, 4H), 7.10 – 7.08 (m, 2H), 6.69 – 6.67 (m, 1H), 4.63 (t,  $J = 9.0$

Hz, 2H), 3.98 (dd,  $J = 11.0, 4.5$  Hz, 1H), 3.18 – 3.06 (m, 2H), 2.64 – 2.58 (m, 1H), 2.31 – 2.23 (m, 1H), 1.54 (td,  $J = 13.5, 5.0$  Hz, 1H), 1.38 (td,  $J = 12.5, 4.0$  Hz, 1H), 1.32 (s, 3 H), 1.29 (s, 3 H);  $^{13}\text{C}$  NMR (126 MHz,  $\text{CDCl}_3$ )  $\delta$  164.6, 132.2, 130.7, 129.7, 128.9, 128.5, 128.3, 127.9, 126.3, 124.3, 109.1, 72.3, 71.3, 38.1, 32.0, 28.6, 26.5, 26.2, 23.6. HRMS (ESI)  $m/z$ :  $[\text{M}+\text{H}]^+$  calcd. for  $\text{C}_{21}\text{H}_{24}\text{NO}_3\text{S}$  370.1471, found 370.1478.

### 5-(Dibenzo[b,d]furan-2-ylsulfonyl)-2,2-dimethyl-5-phenylpentanenitrile (3ao)

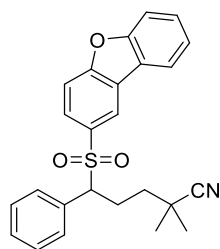

Colorless oil;  $^1\text{H}$  NMR (500 MHz,  $\text{CDCl}_3$ )  $\delta$  8.09 – 8.08 (m, 1H), 7.88 – 7.86 (m, 1H), 7.62 – 7.60 (m, 1H), 7.55 – 7.52 (m, 2H), 7.51 – 7.49 (m, 1H), 7.42 – 7.39 (m, 1H), 7.29 – 7.26 (m, 1H), 7.23 – 7.20 (m, 2H), 7.09 – 7.08 (m, 2H), 4.11 (dd,  $J = 11.0, 4.5$  Hz, 1H), 2.76 – 2.09 (m, 1H), 2.41 – 2.33 (m, 1H), 1.59 (td,  $J = 13.5, 5.0$  Hz, 1H), 1.43 (td,  $J = 12.5, 4.0$  Hz, 1H), 1.35 (s, 3H), 1.32 (s, 3H);  $^{13}\text{C}$  NMR (126 MHz,  $\text{CDCl}_3$ )  $\delta$  158.6, 156.9, 131.9, 131.3, 129.7, 129.1, 128.7, 128.6, 128.0, 124.7, 124.4, 123.7, 122.9, 122.7, 121.1, 112.1, 111.8, 71.5, 38.1, 32.1, 26.6, 26.3, 23.5. HRMS (ESI)  $m/z$ :  $[\text{M}+\text{H}]^+$  calcd. for  $\text{C}_{25}\text{H}_{24}\text{NO}_3\text{S}$  418.1471, found 418.1482.

### *N*-(4-((4-cyano-4-methyl-1-phenylpentyl)sulfonyl)phenyl)acetamide (3ap)

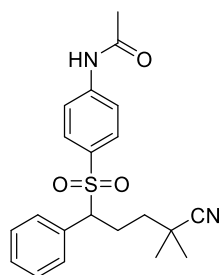

White solid, m.p. 154.9 – 156.2 °C;  $^1\text{H}$  NMR (500 MHz,  $\text{CDCl}_3$ )  $\delta$  7.72 (br, 1H), 7.54 – 7.52 (m, 2H), 7.40 – 7.38 (m, 2H), 7.32 – 7.29 (m, 1H), 7.26 – 7.23 (m, 2H), 7.09 – 7.07 (m, 2H), 4.01 (dd,  $J = 11.0, 4.5$  Hz, 1H), 2.65 – 2.58 (m, 1H), 2.33 – 2.25 (m, 1H), 2.18 (s, 3H), 1.53 (td,  $J = 13.5, 5.0$  Hz, 1H), 1.37 (td,  $J = 13.0, 4.0$  Hz, 1H), 1.32 (s,

3H), 1.30 (s, 3H);  $^{13}\text{C}$  NMR (126 MHz,  $\text{CDCl}_3$ )  $\delta$  168.2, 142.9, 131.6, 131.2, 130.3, 129.7, 129.1, 128.7, 124.4, 118.6, 71.1, 38.0, 32.1, 26.5, 26.3, 24.7, 23.5. HRMS (ESI)  $m/z$ :  $[\text{M}+\text{H}]^+$  calcd. for  $\text{C}_{21}\text{H}_{25}\text{N}_2\text{O}_3\text{S}$  385.1580, found 385.1587.

**5-((2-Acetylisoindolin-5-yl)sulfonyl)-2,2-dimethyl-5-phenylpentanenitrile (3aq)**

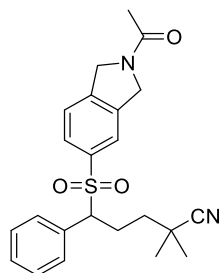

White solid, m.p. 170.1 – 171.5 °C;  $^1\text{H}$  NMR (500 MHz,  $\text{CDCl}_3$ )  $\delta$  8.16 – 8.14 (m, 1H), 7.32 – 7.28 (m, 2H), 7.26 – 7.23 (m, 2H), 7.18 (br, 1H), 7.09 – 7.08 (m, 2H), 4.09 (t,  $J = 8.5$  Hz, 2H), 3.99 (dd,  $J = 11.0, 4.0$  Hz, 1H), 3.16 – 3.03 (m, 2H), 2.65 – 2.58 (m, 1H), 2.32 – 2.27 (m, 1H), 2.23 (s, 3H), 1.53 (td,  $J = 13.5, 5.0$  Hz, 1H), 1.38 (td,  $J = 12.5, 4.0$  Hz, 1H), 1.32 (s, 3H), 1.30 (s, 3H);  $^{13}\text{C}$  NMR (126 MHz,  $\text{CDCl}_3$ )  $\delta$  169.5, 147.3, 131.9, 131.7, 130.9, 129.8, 129.7, 129.0, 128.6, 125.4, 124.3, 116.1, 71.1, 49.1, 38.0, 32.0, 27.2, 26.5, 26.2, 24.3, 23.5. HRMS (ESI)  $m/z$ :  $[\text{M}+\text{H}]^+$  calcd. for  $\text{C}_{23}\text{H}_{27}\text{N}_2\text{O}_3\text{S}$  411.1737, found 411.1745.

***tert*-Butyl (2,2-dimethyl-5-phenyl-5-tosylpentyl)carbamate (4)**

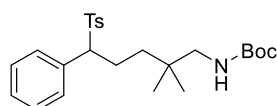

Colorless oil;  $^1\text{H}$  NMR (500 MHz,  $\text{CDCl}_3$ )  $\delta$  7.35 – 7.34 (m, 2H), 7.28 – 7.25 (m, 1H), 7.23 – 7.20 (m, 2H), 7.15 – 7.13 (m, 2H), 7.05 – 7.04 (m, 2H), 4.44 (br, 1H), 3.92 (dd,  $J = 11.5, 3.5$  Hz, 1H), 2.92 – 2.82 (m, 2H), 2.46 – 2.40 (m, 1H), 2.37 (s, 3H), 2.13 – 2.04 (m, 1H), 1.39 (s, 9H), 1.14 (td,  $J = 13.0, 4.5$  Hz, 1H), 0.97 (td,  $J = 13.0, 4.0$  Hz, 1H), 0.83 (s, 3H), 0.81 (s, 3H);  $^{13}\text{C}$  NMR (126 MHz,  $\text{CDCl}_3$ )  $\delta$  156.1, 144.3, 134.3, 132.4, 129.7, 129.2, 129.0, 128.7, 128.4, 79.0, 72.0, 50.2, 36.6, 34.4, 28.3, 24.5, 24.4, 22.0, 21.6. HRMS(ESI)  $m/z$ :  $[\text{M}+\text{H}]^+$  calcd. for  $\text{C}_{25}\text{H}_{36}\text{NO}_4\text{S}$ : 446.2360, Found: 446.2364.

## 2,2-Dimethyl-5-phenyl-5-tosylpentanal (5)

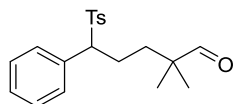

Colorless oil;  $^1\text{H}$  NMR (500 MHz,  $\text{CDCl}_3$ )  $\delta$  9.34 (br, 1H), 7.33 – 7.32 (m, 2H), 7.30 – 7.27 (m, 1H), 7.24 – 7.21 (m, 2H), 7.15 – 7.13 (m, 2H), 7.05 – 7.04 (m, 2H), 3.94 (dd,  $J = 11.0, 3.5$  Hz, 1H), 2.43 – 2.38 (m, 1H), 2.37 (s, 3H), 2.09 – 2.01 (m, 1H), 1.42 (td,  $J = 13.0, 4.5$  Hz, 1H), 1.27 (td,  $J = 13.5, 4.0$  Hz, 1H), 1.02 (s, 6H);  $^{13}\text{C}$  NMR (126 MHz,  $\text{CDCl}_3$ )  $\delta$  205.4, 144.5, 134.0, 132.0, 129.7, 129.2, 129.0, 128.8, 128.5, 71.7, 45.6, 33.8, 22.3, 21.6, 21.3, 21.0. HRMS(ESI)  $m/z$ :  $[\text{M}+\text{H}]^+$  calcd. for  $\text{C}_{20}\text{H}_{25}\text{O}_3\text{S}$ : 345.1519, Found: 345.1520.

## 7. References

1. K. Guo, C. Han, X. Xie, B. Chen, S. Cao, W. Yuan, K. Chen, F. Liu and Y. Zhu, Merging photoredox with copper catalysis: enantioselective remote cyanation *via* 1,4-heteroaryl migration, *Chem. Commun.*, 2022, **58**, 13353–13356.
2. B. Du, P. Qian, Y. Wang, H. Mei, J. Han and Y. Pan, Cu-Catalyzed Deoxygenative C2-Sulfonylation Reaction of Quinoline *N*-Oxides with Sodium Sulfinat, *Org. Lett.*, 2016, **18**, 4144–4147.
3. S. Caddick, D. B. Judd, A. K. de K Lewis, M. T. Reich and M. R. Williams, A Generic Approach for the Catalytic Reduction of Nitriles, *Tetrahedron*, 2003, **59**, 5417–5423.
4. B.-B. Gou, H. Yang, H.-R. Sun, J. Chen, J. Wu and L. Zhou, Phenanthrene Synthesis by Palladium (II)-Catalyzed  $\gamma$ -C(sp<sup>2</sup>)-H Arylation, Cyclization, and Migration Tandem Reaction, *Org. Lett.*, 2019, **21**, 80–84.



## 8. NMR spectra

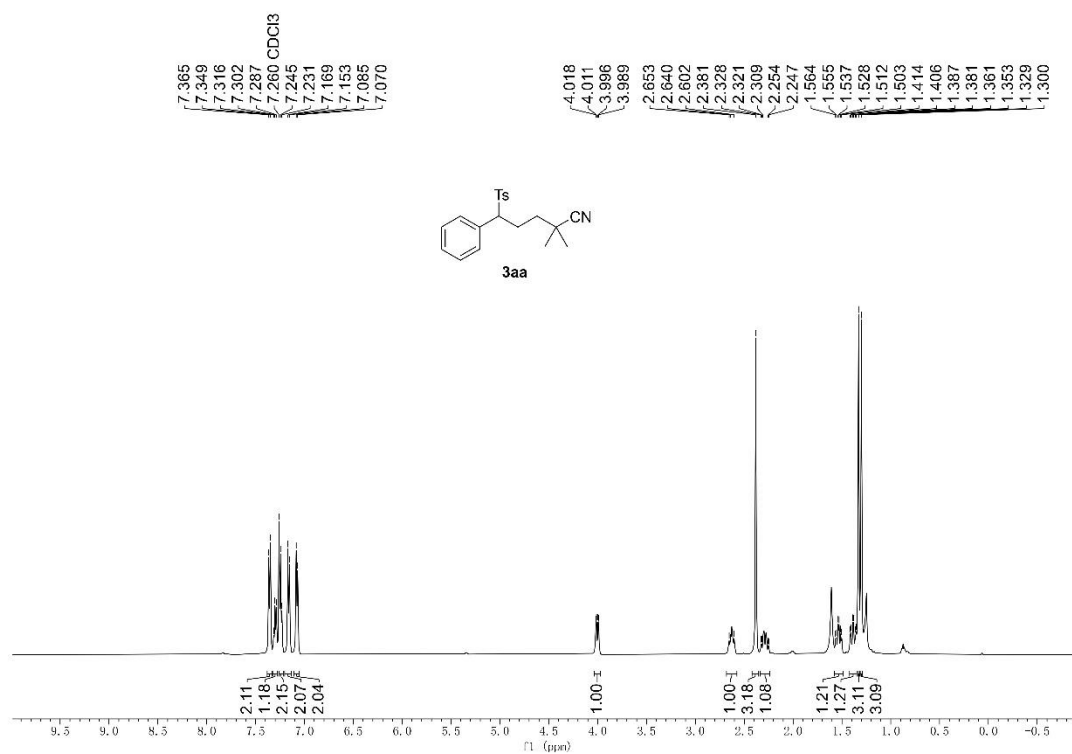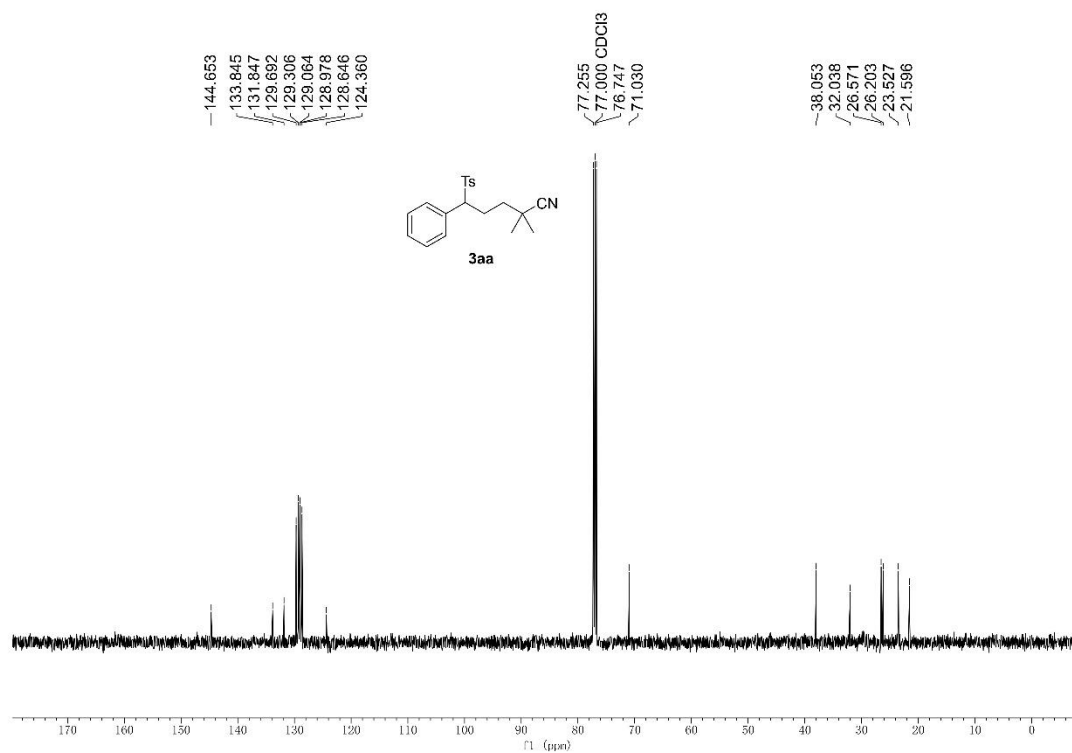

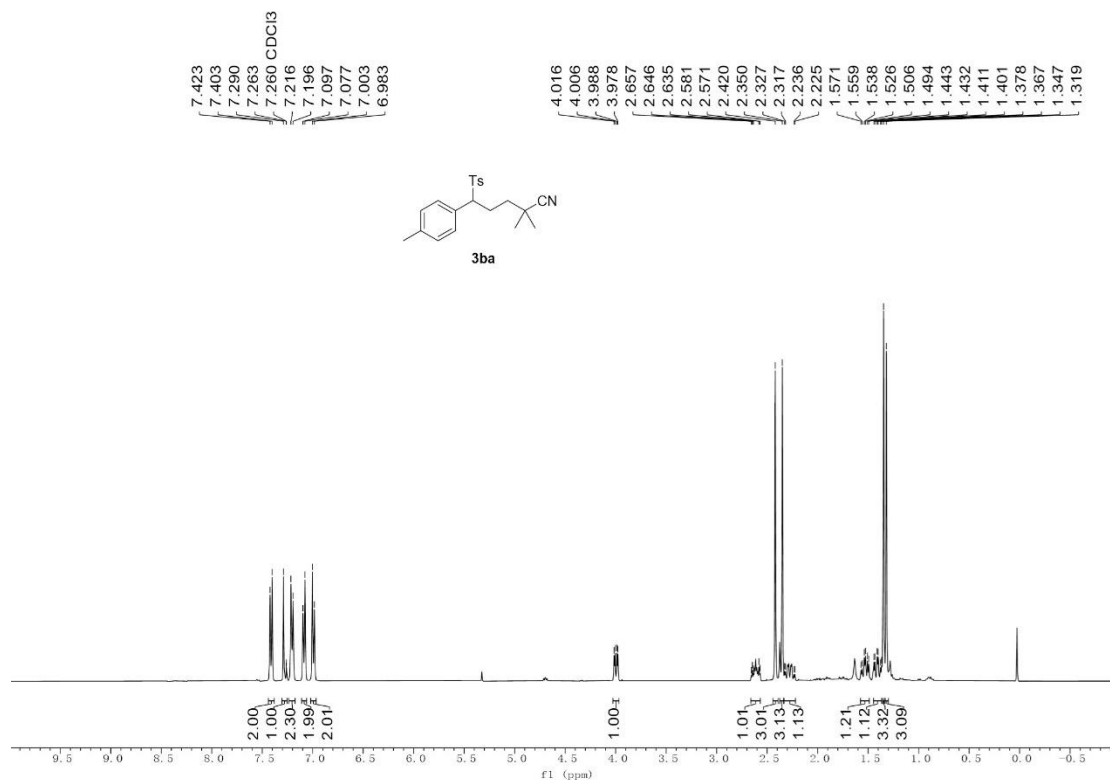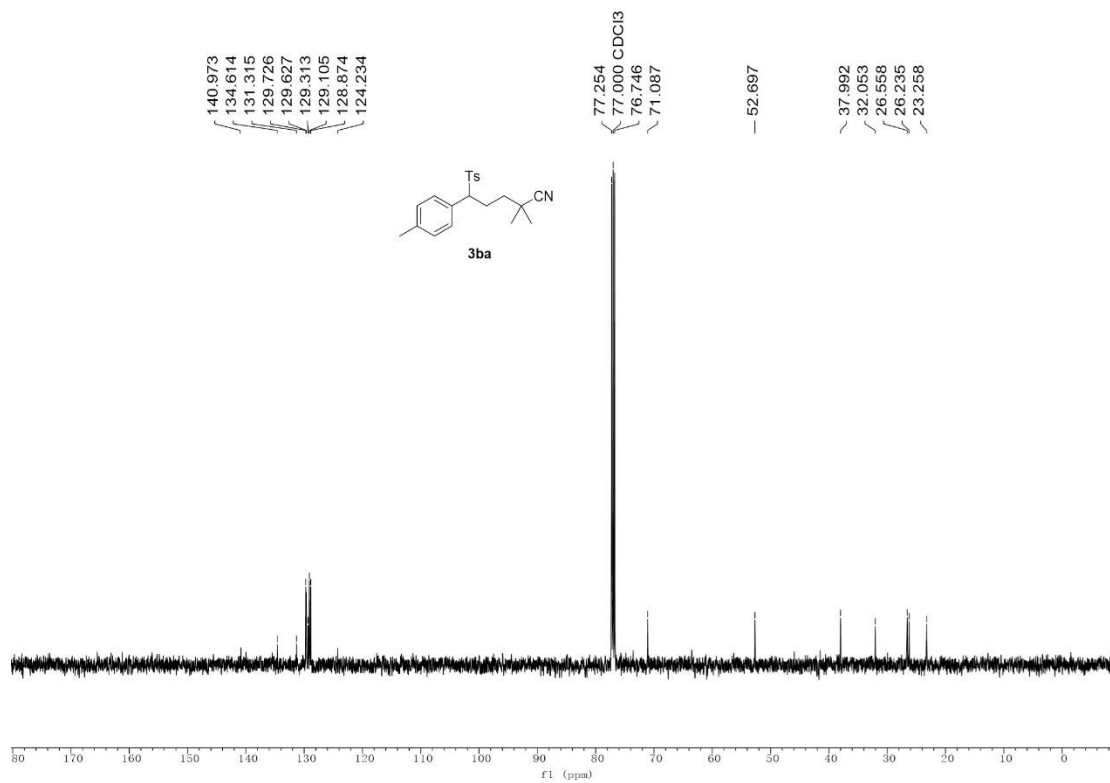

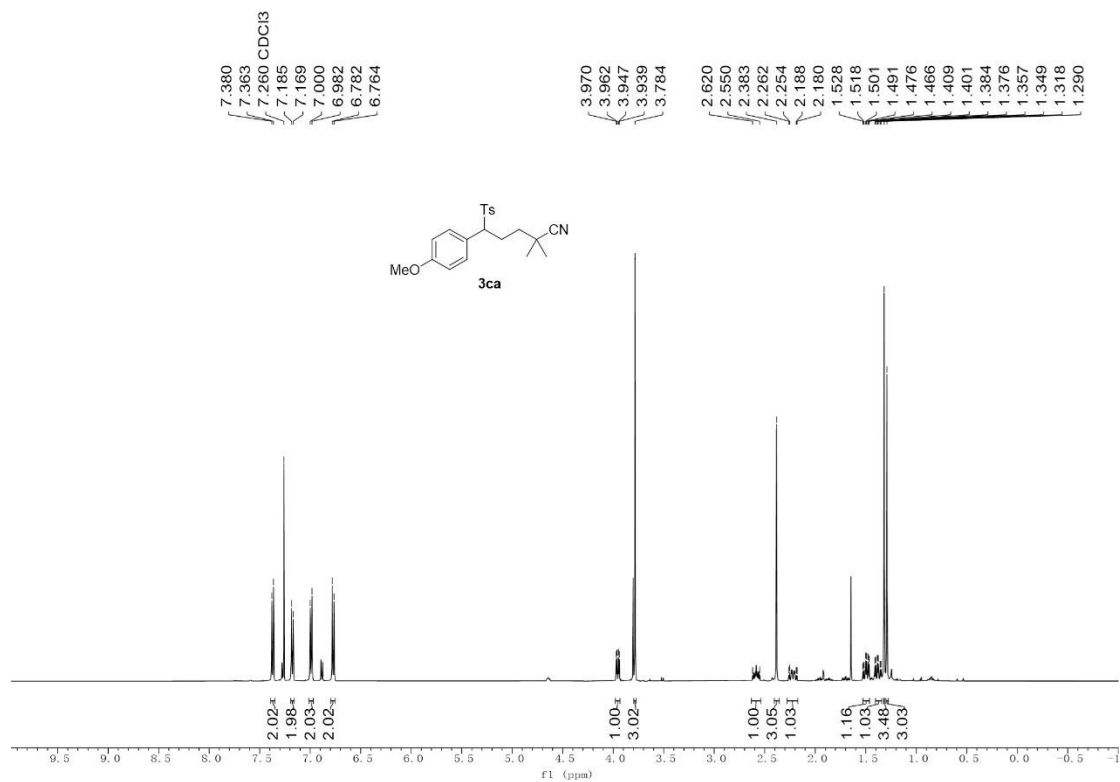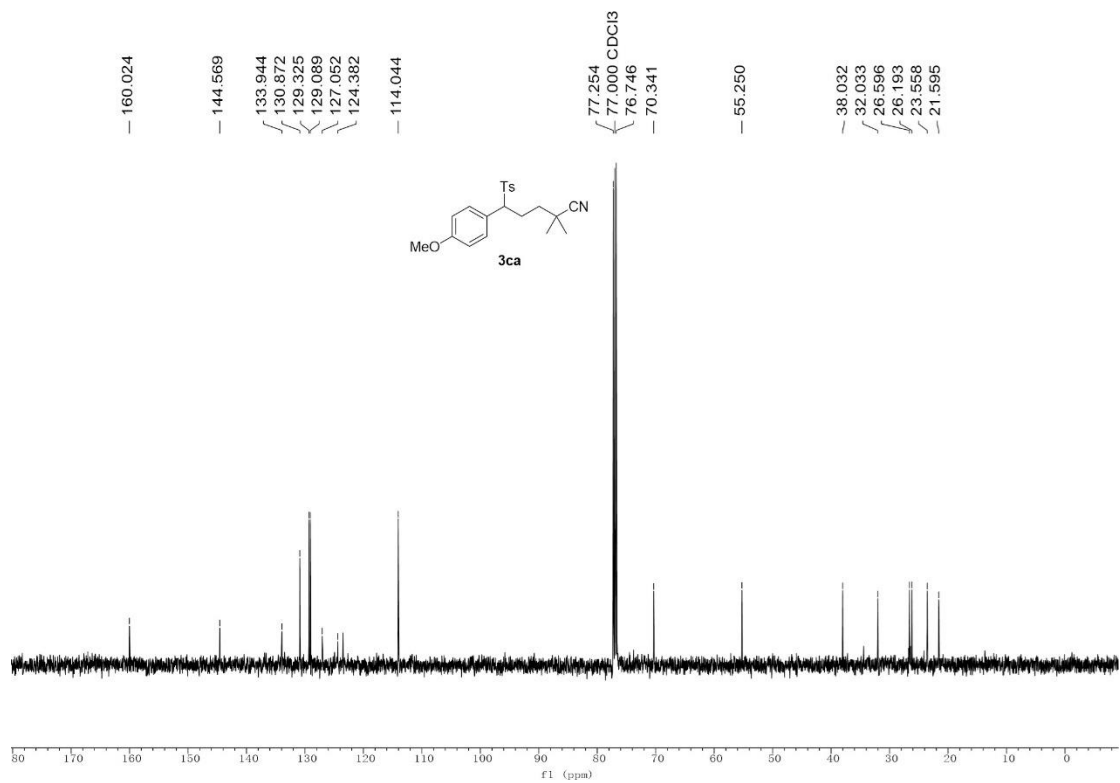

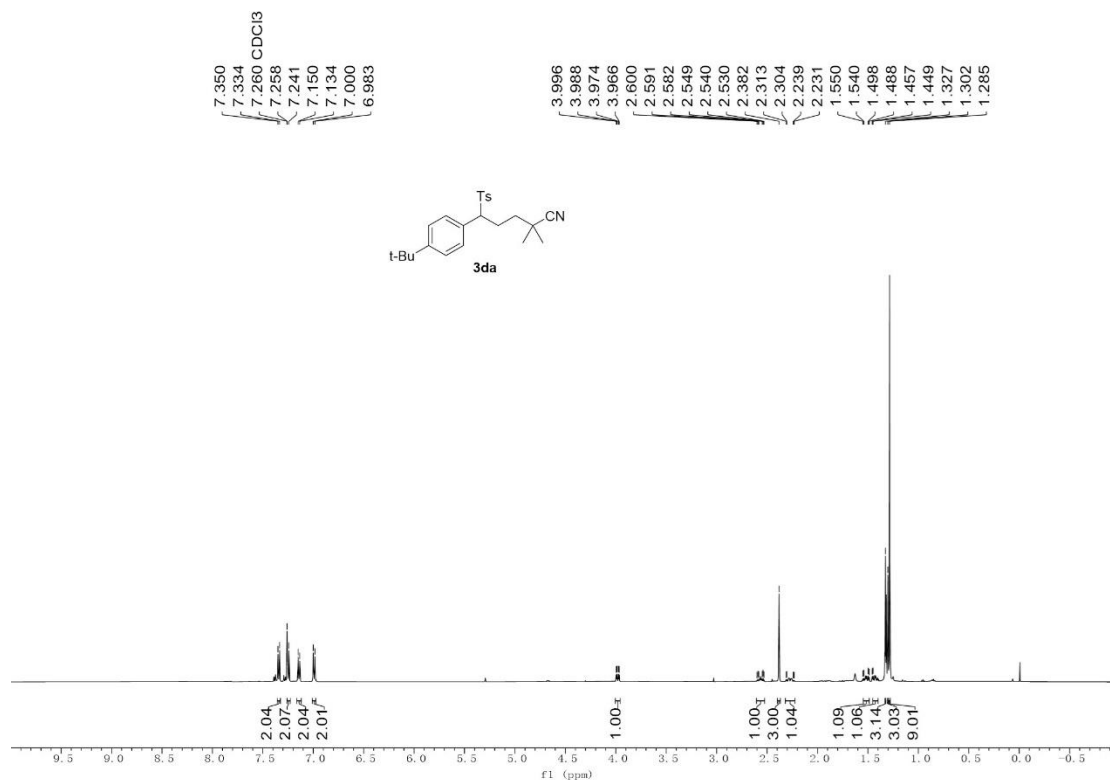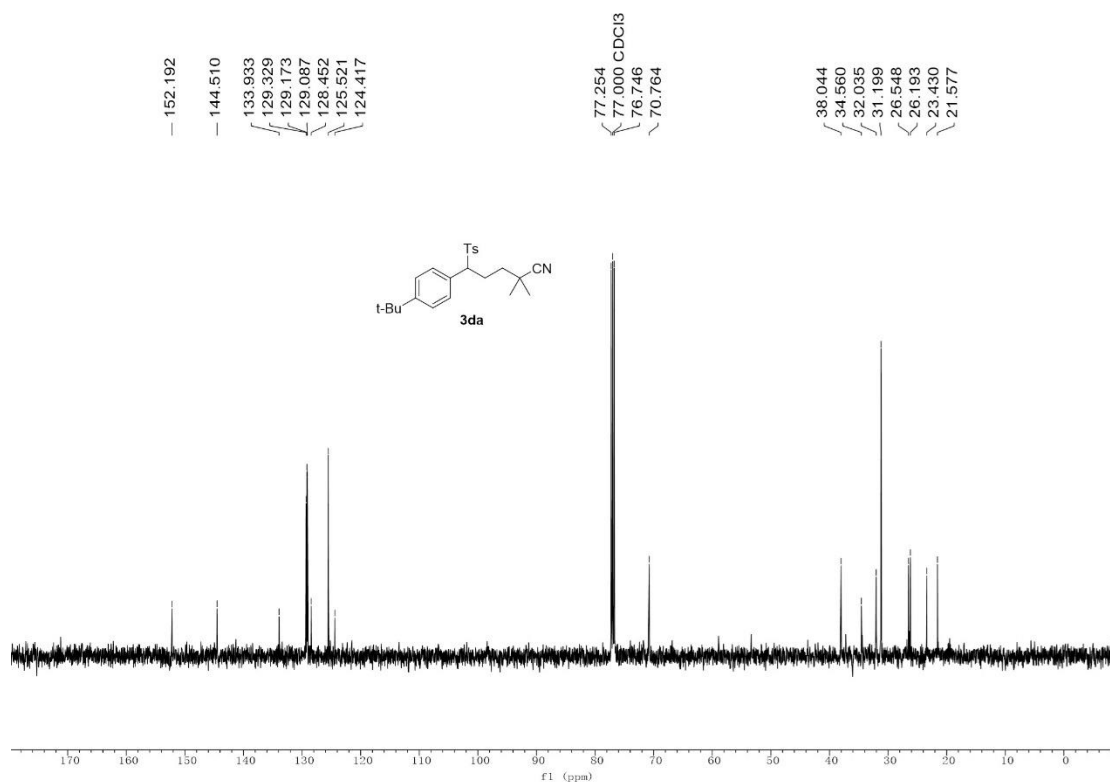

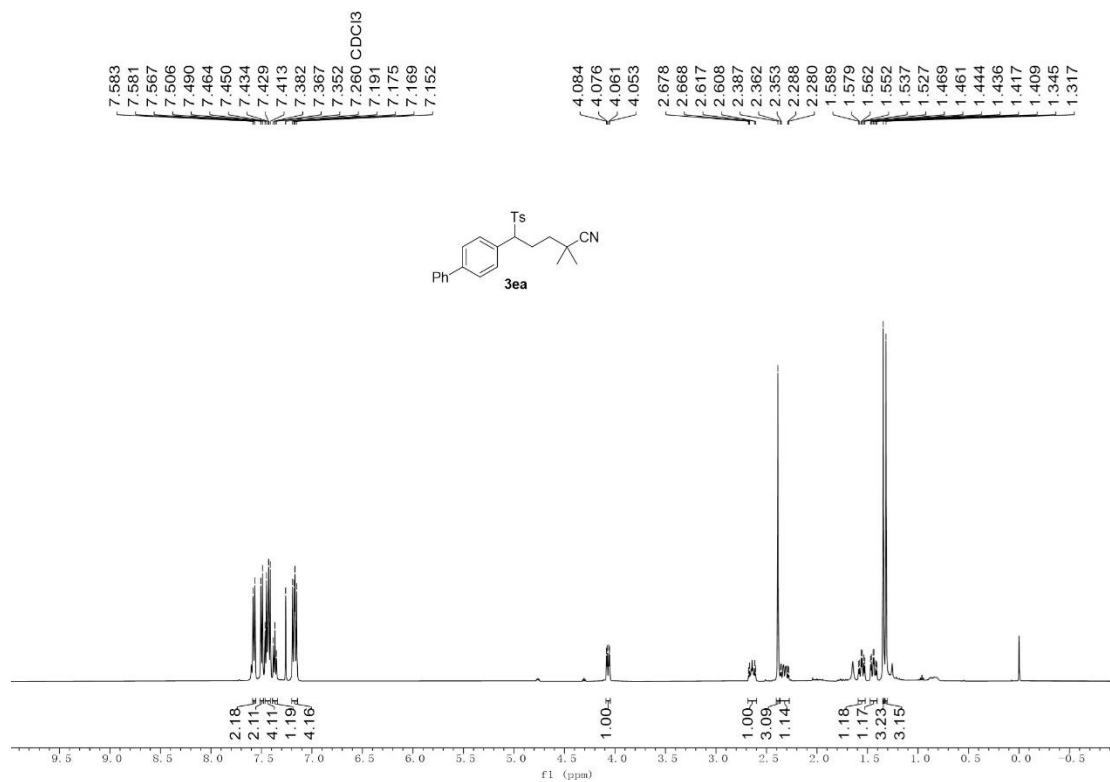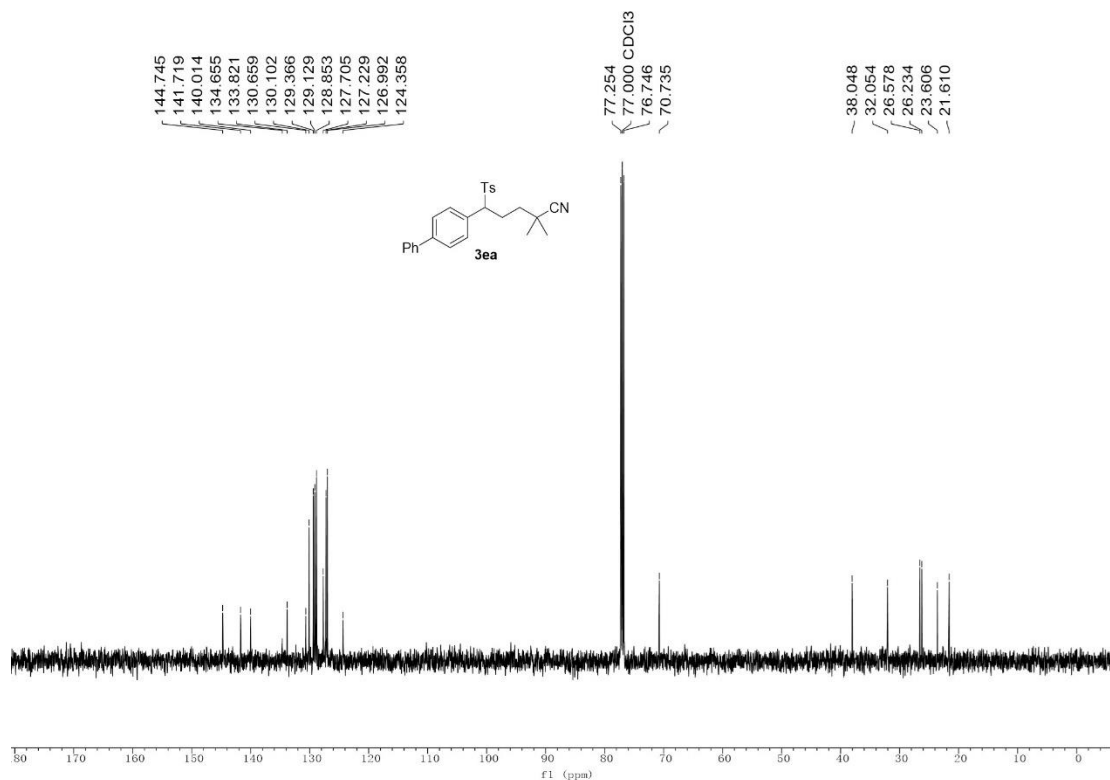

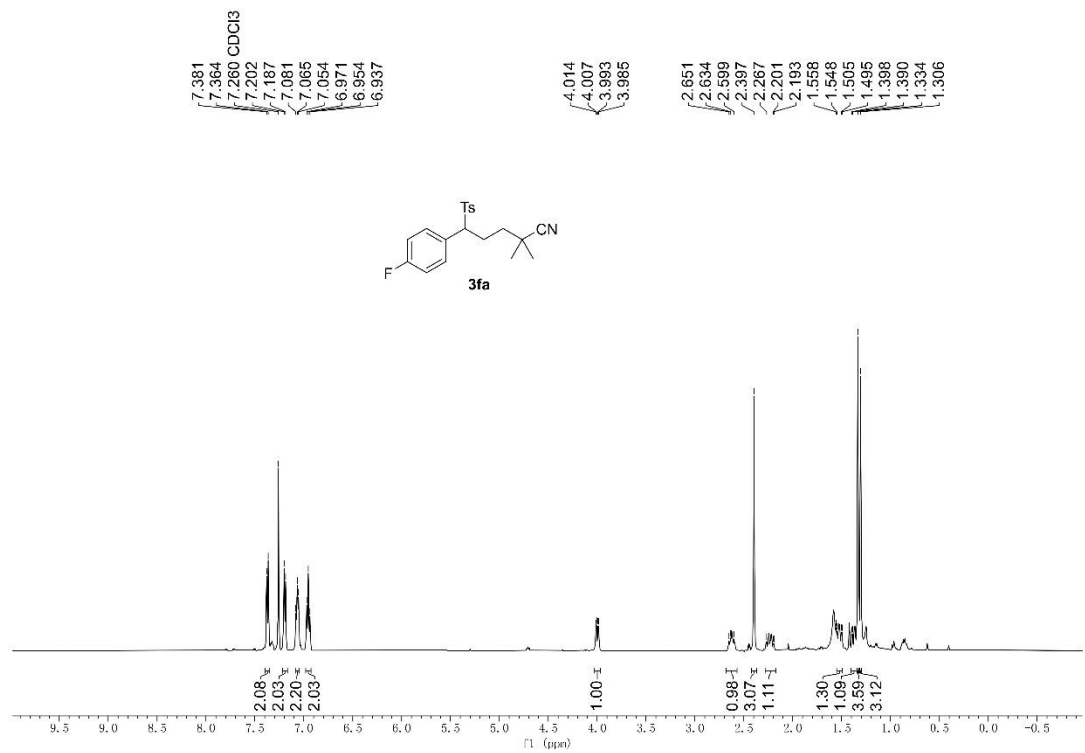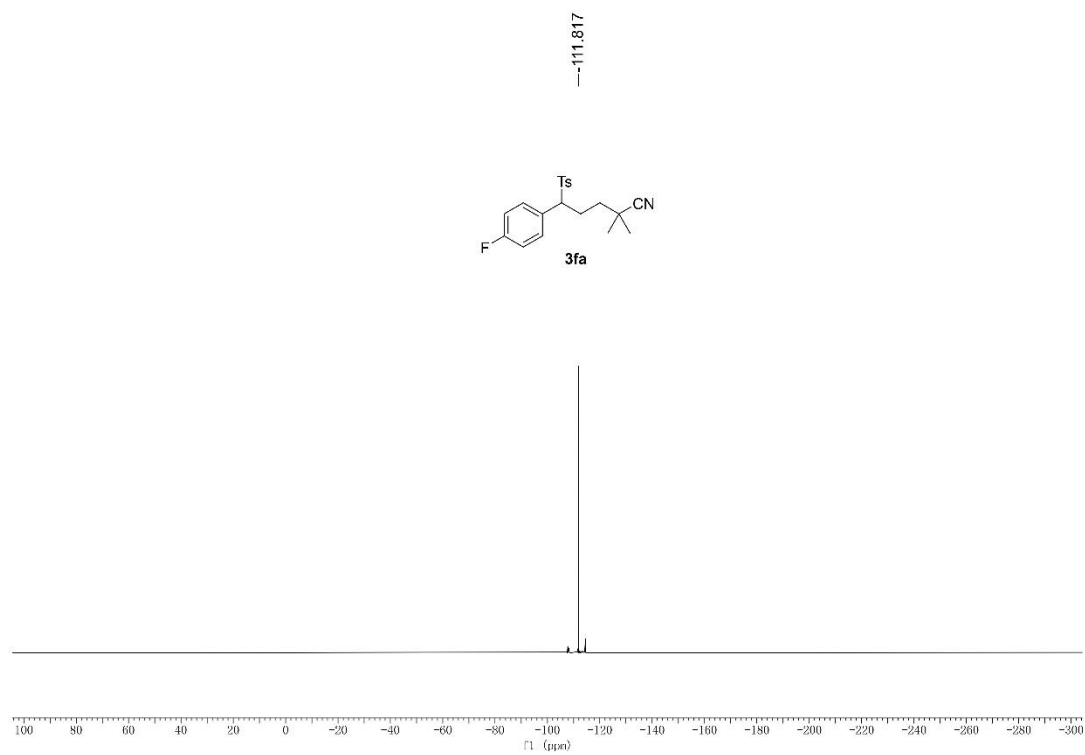

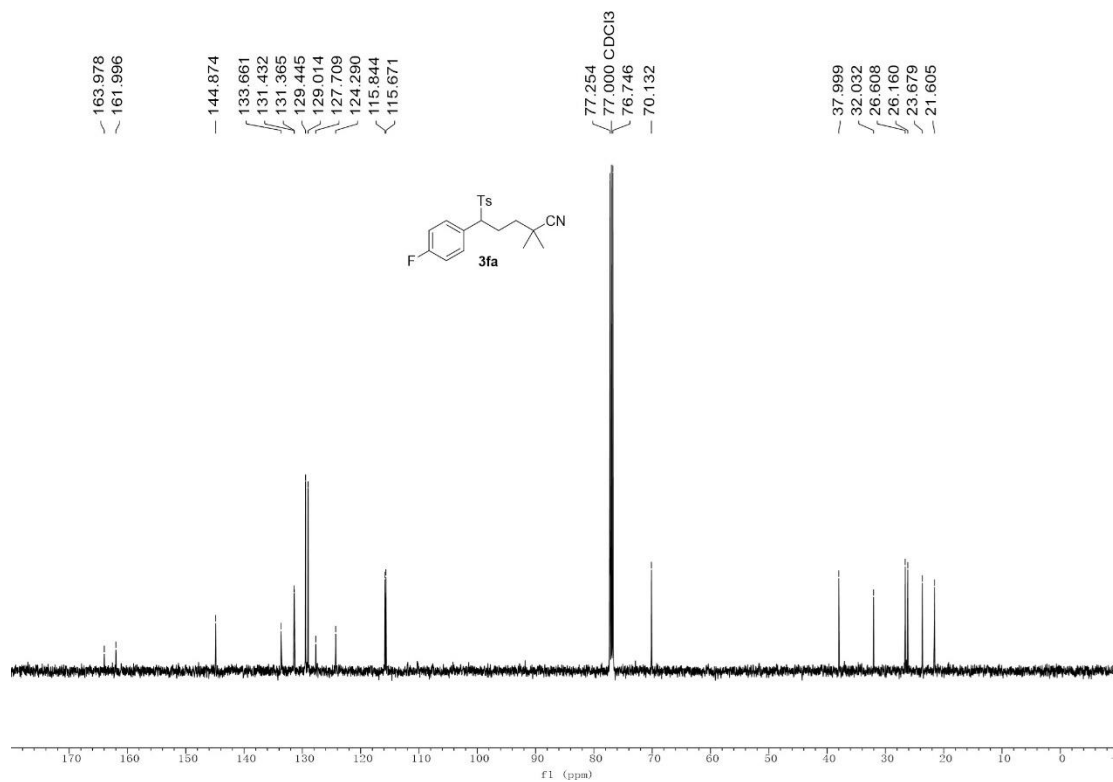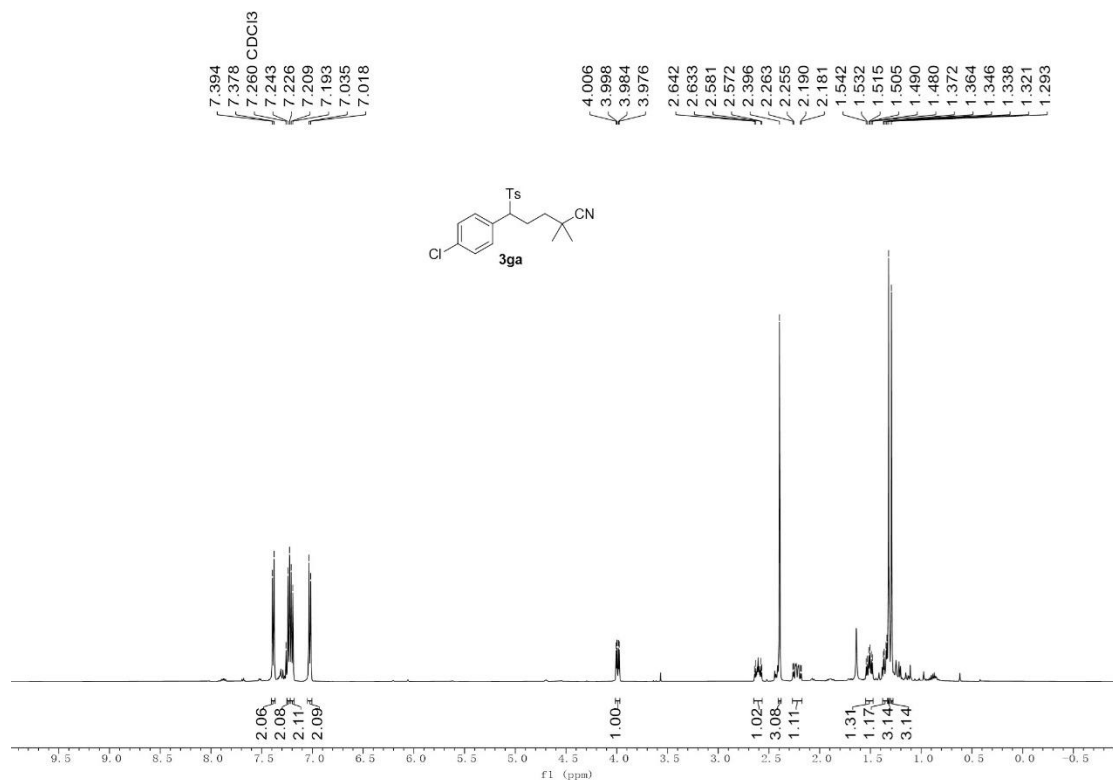

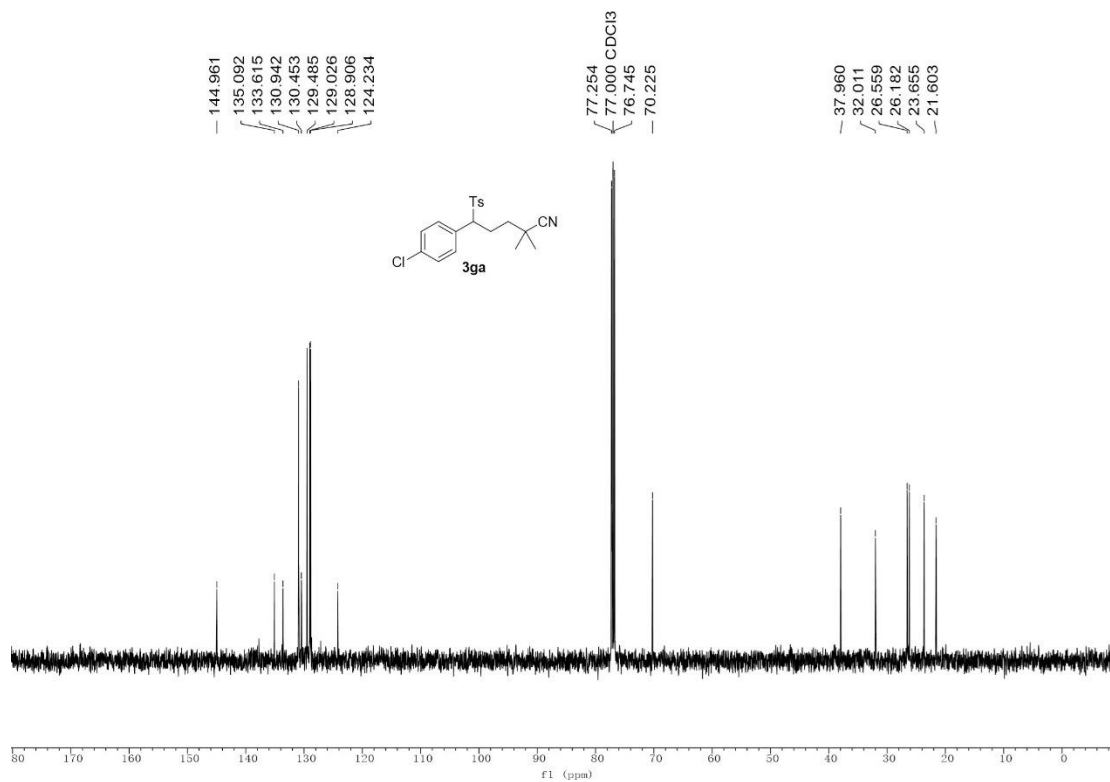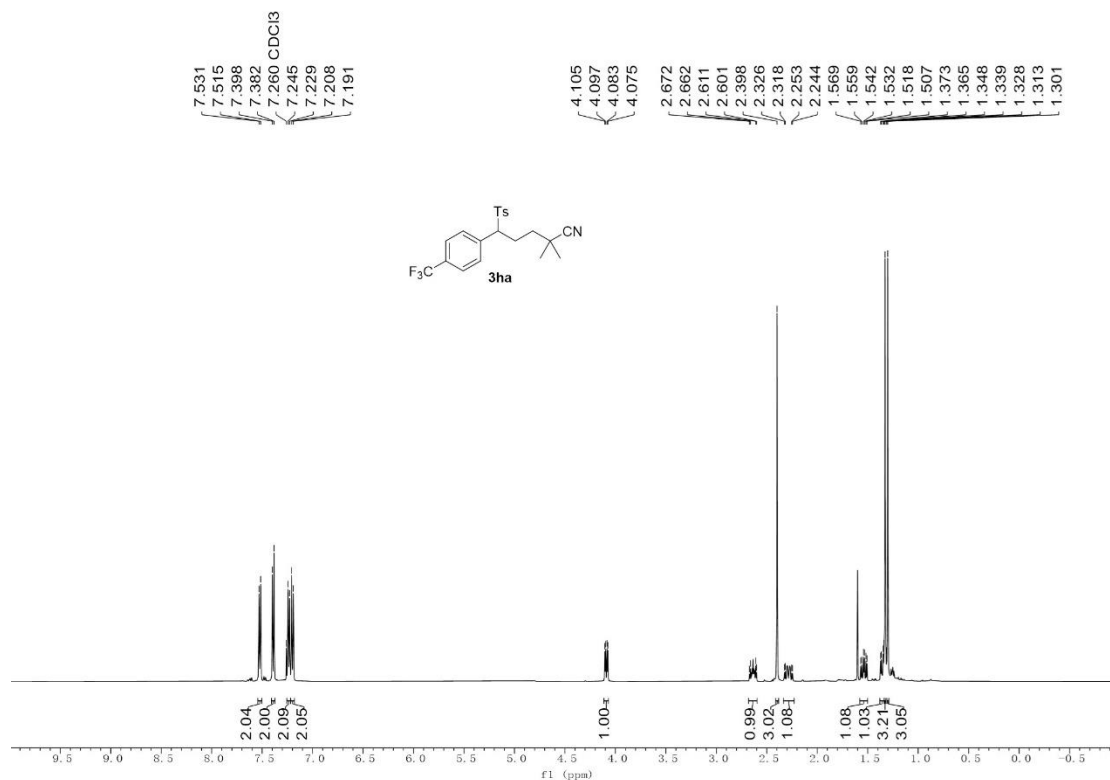



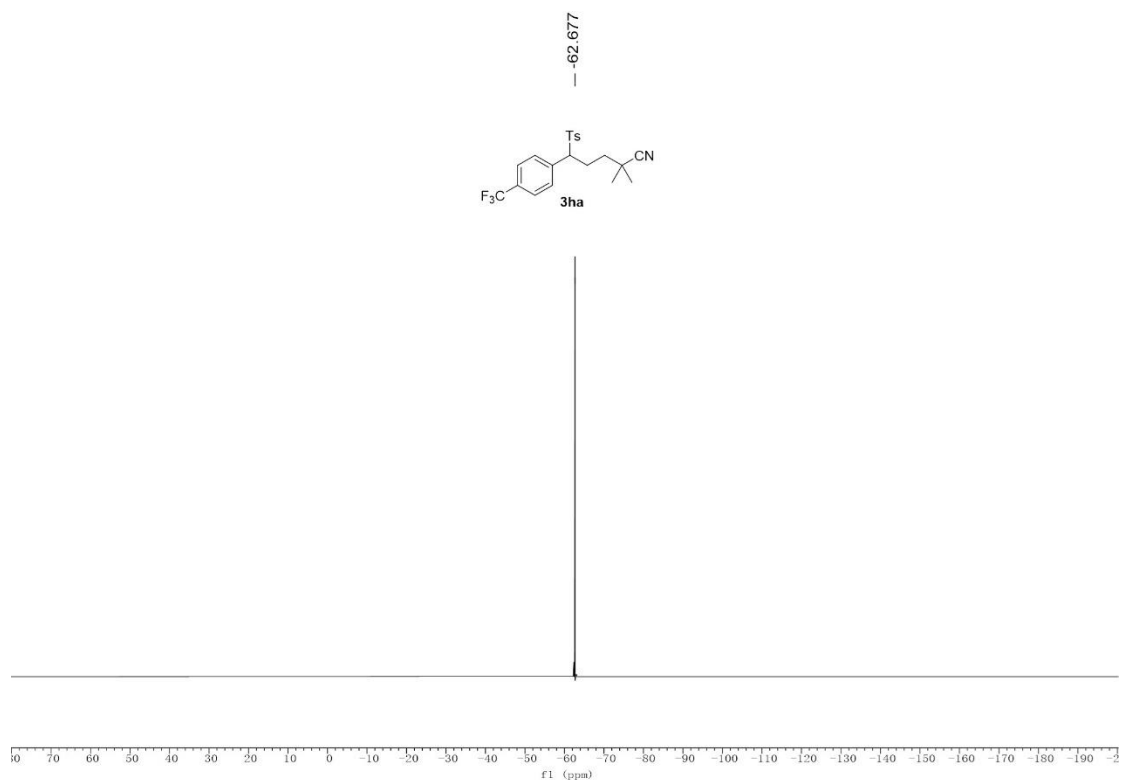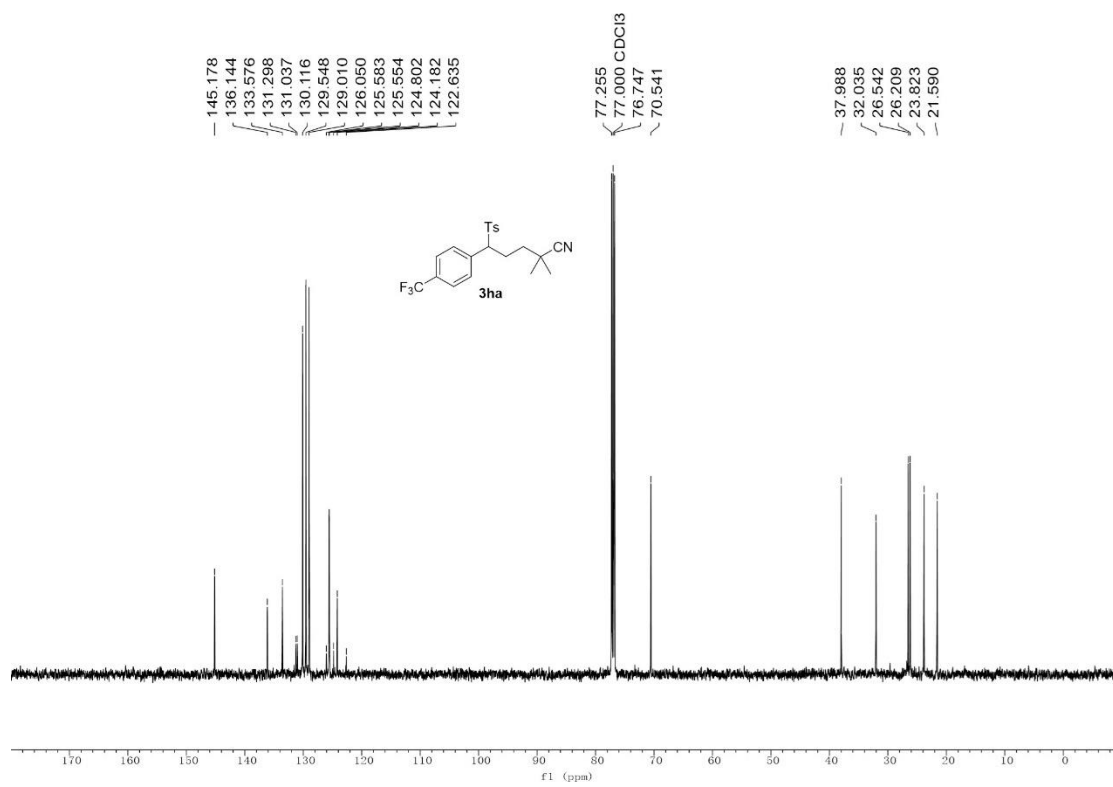

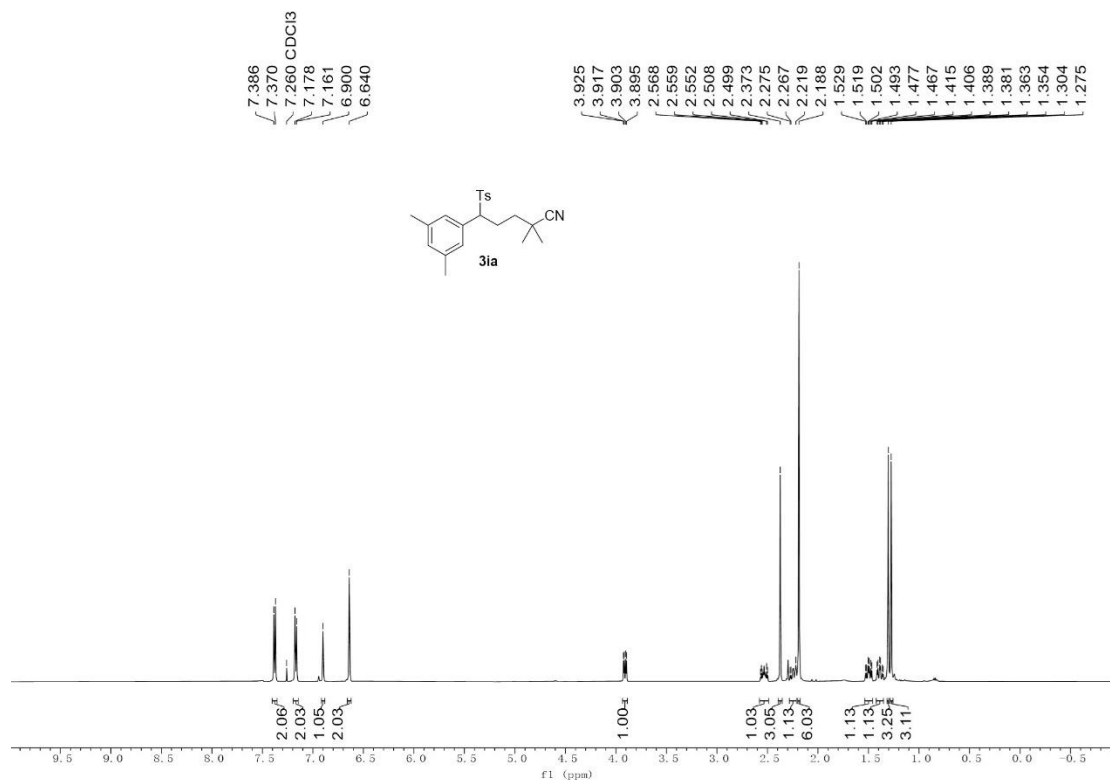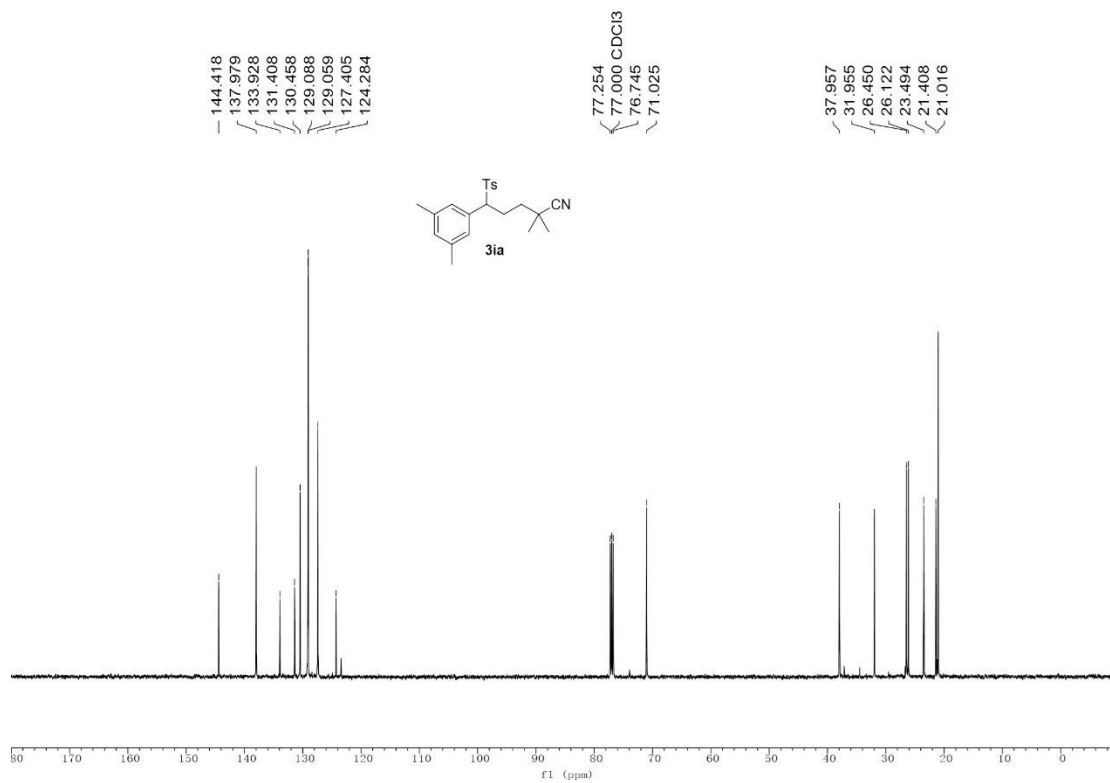

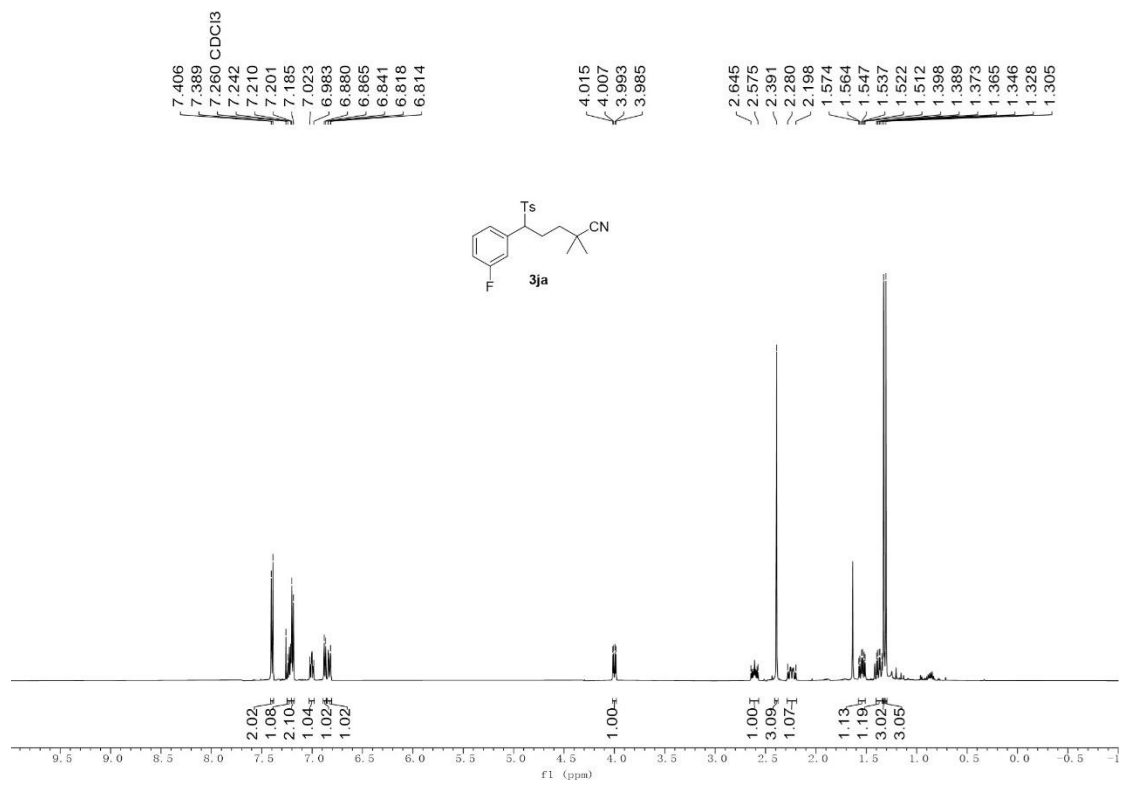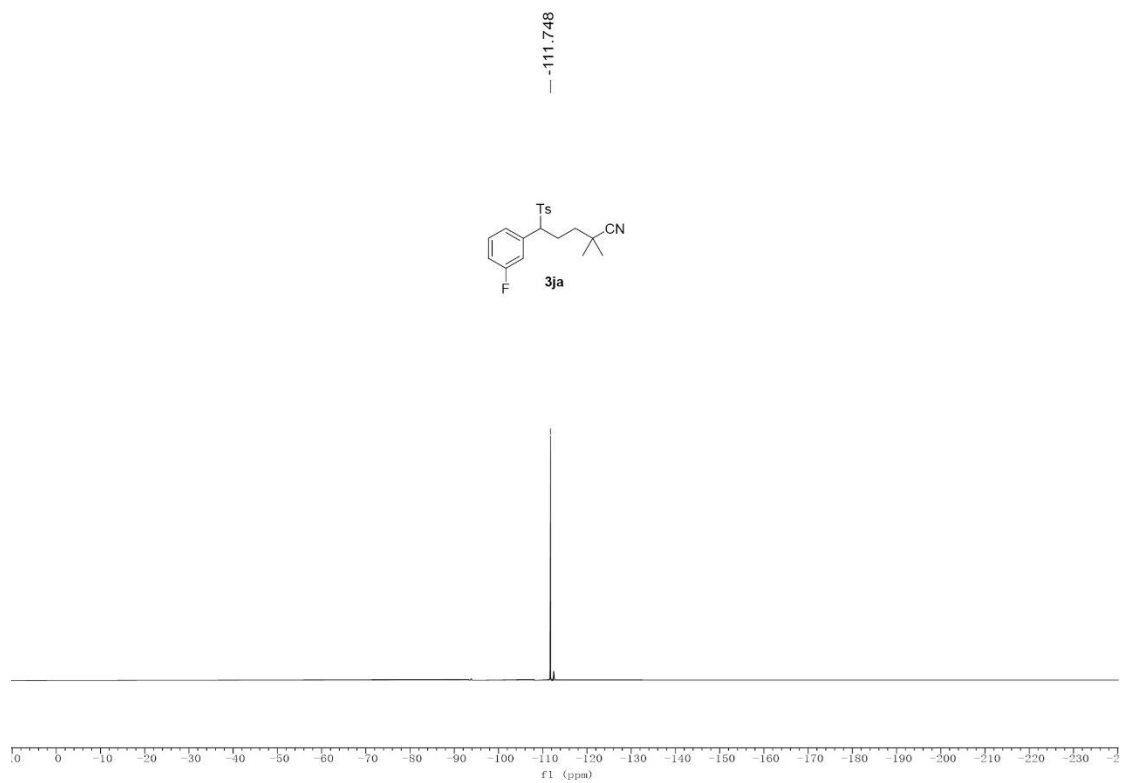

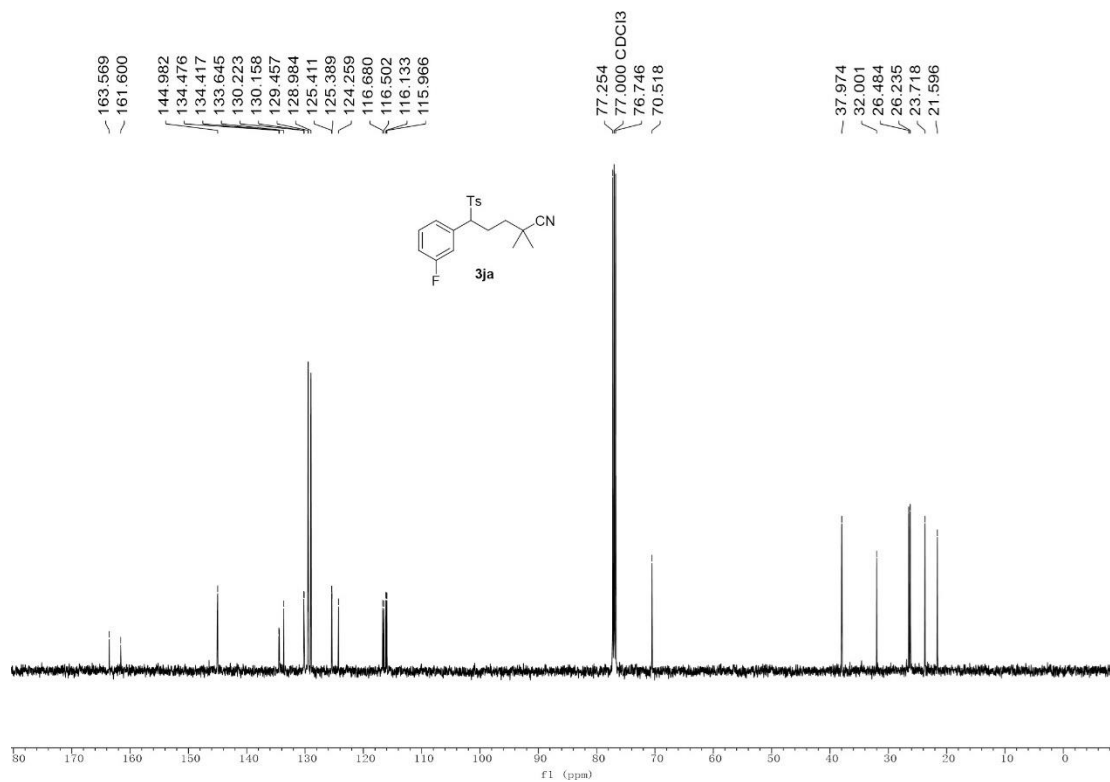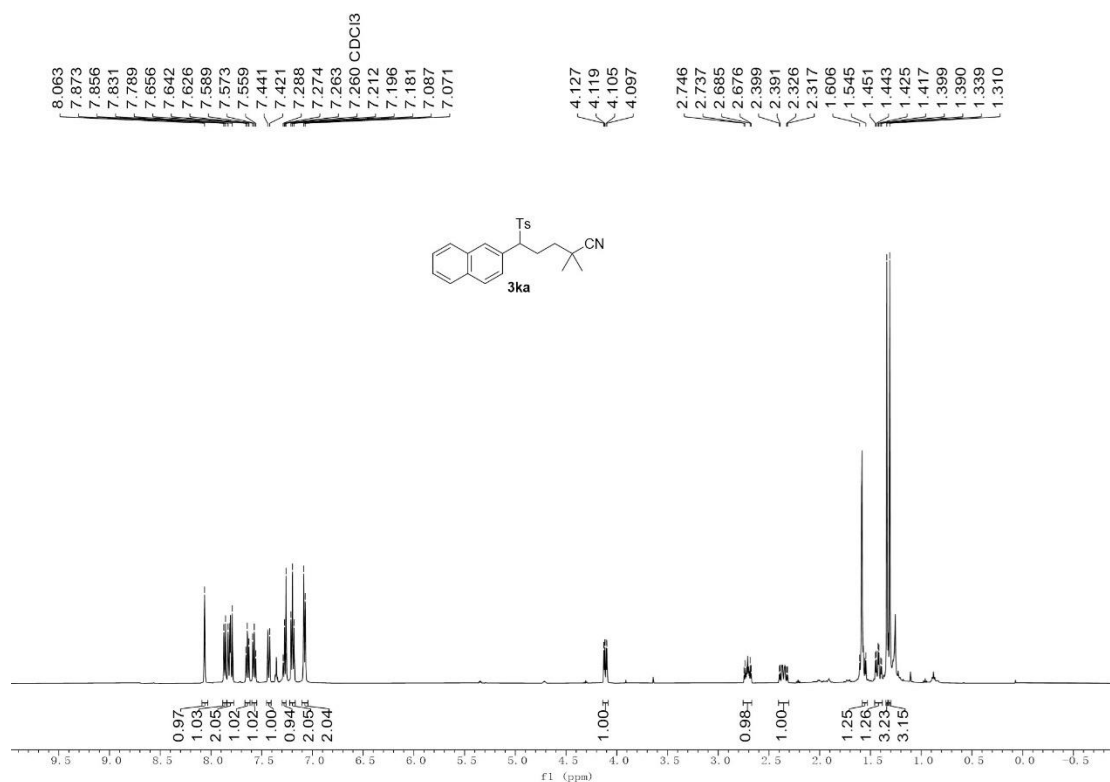

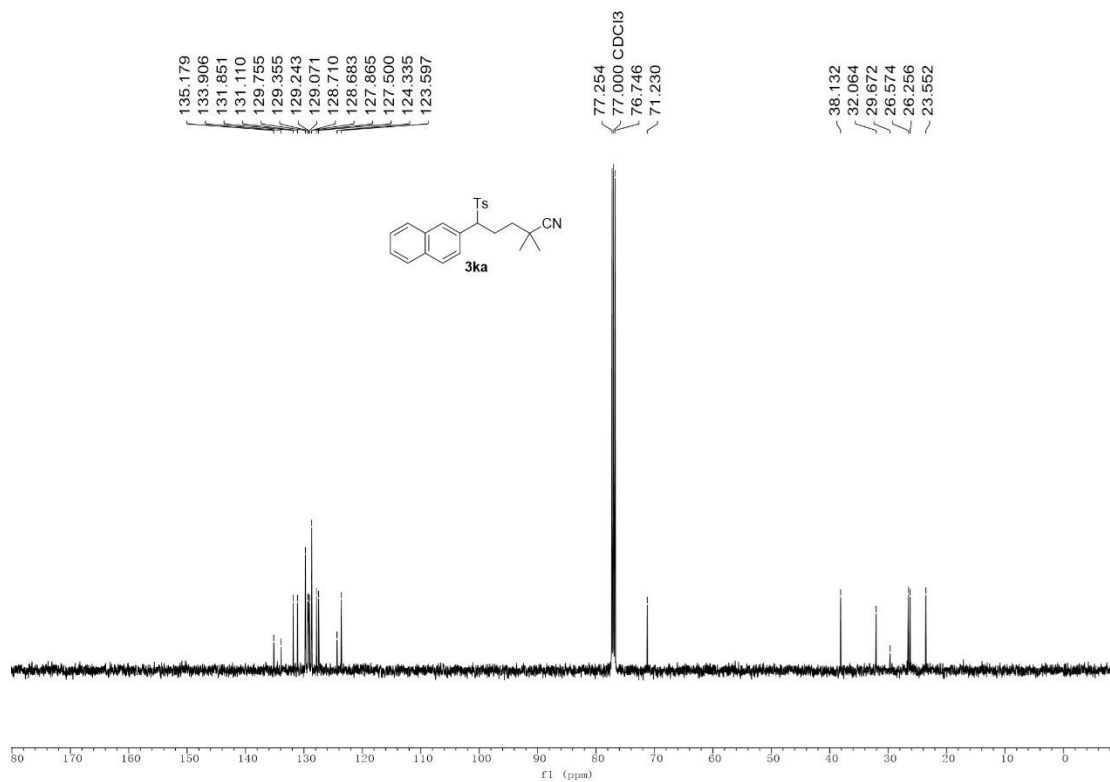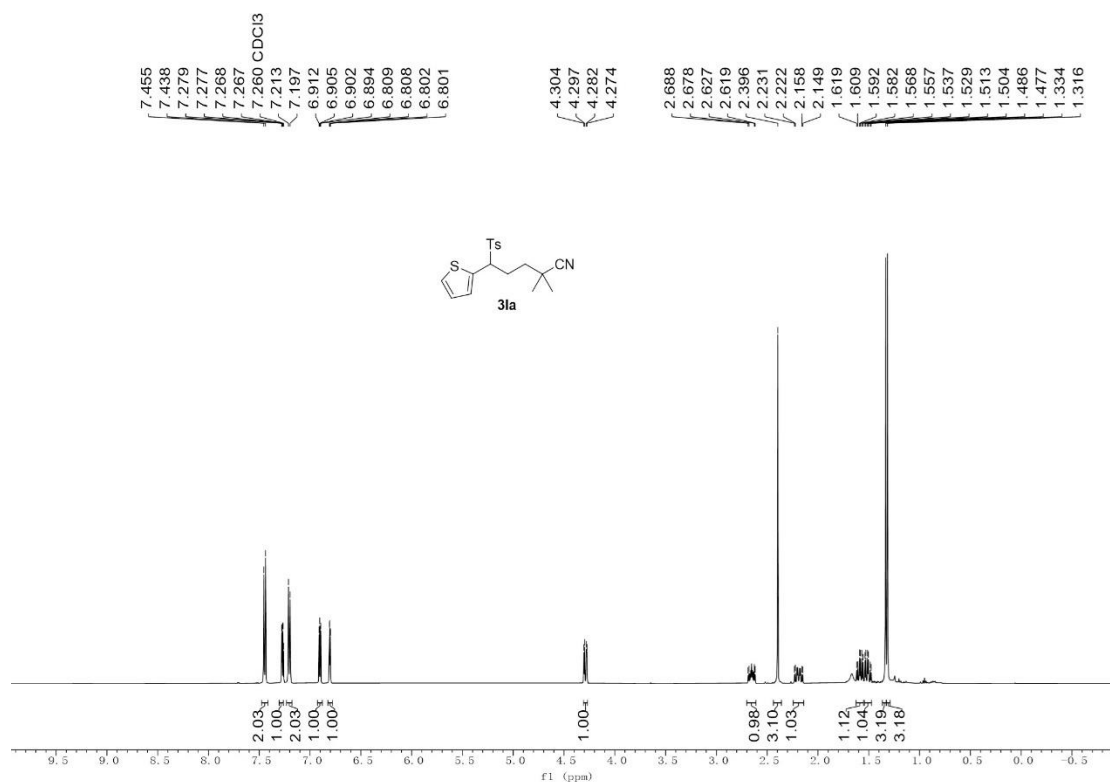

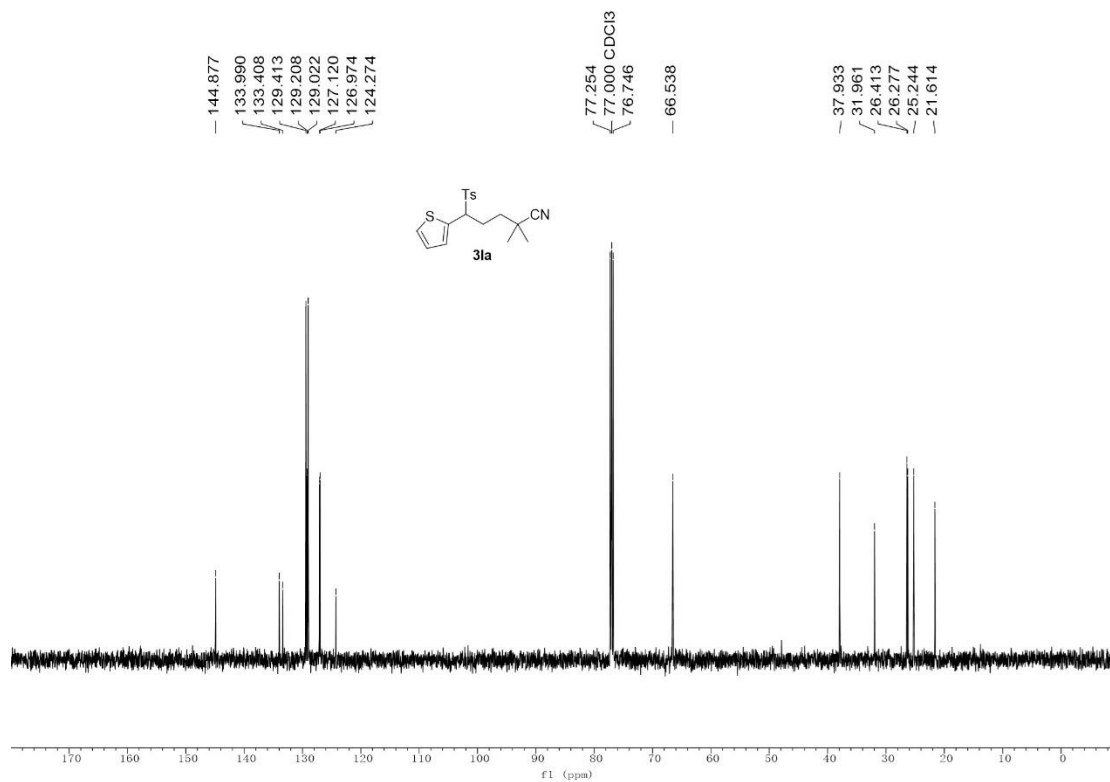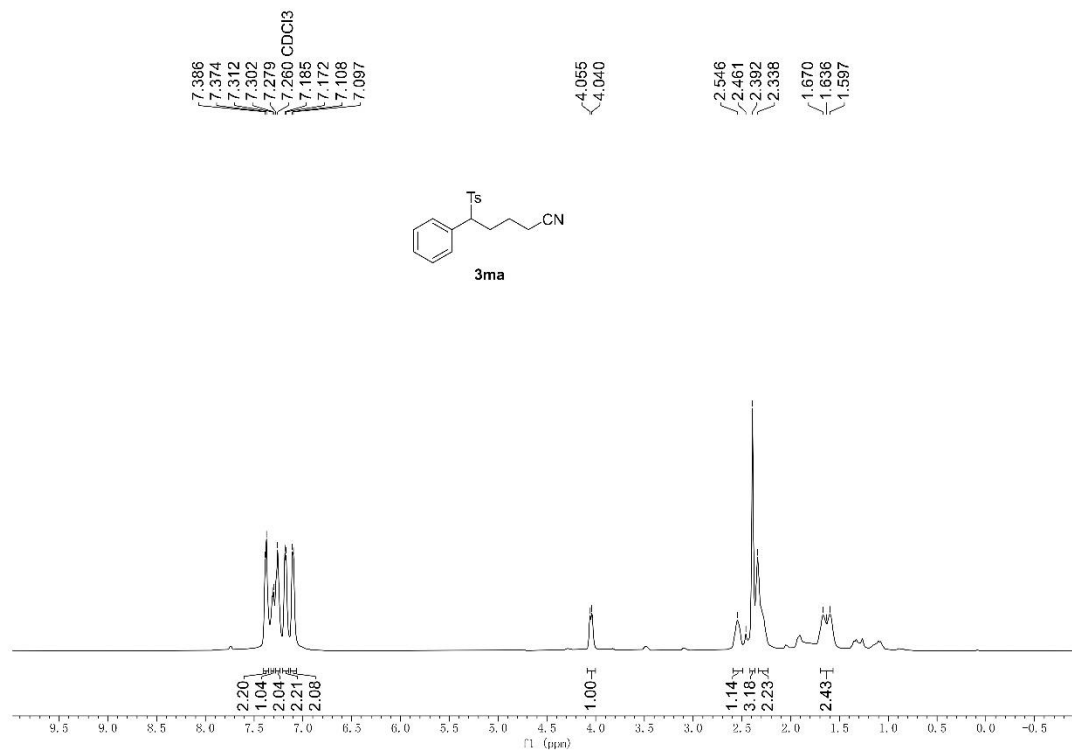

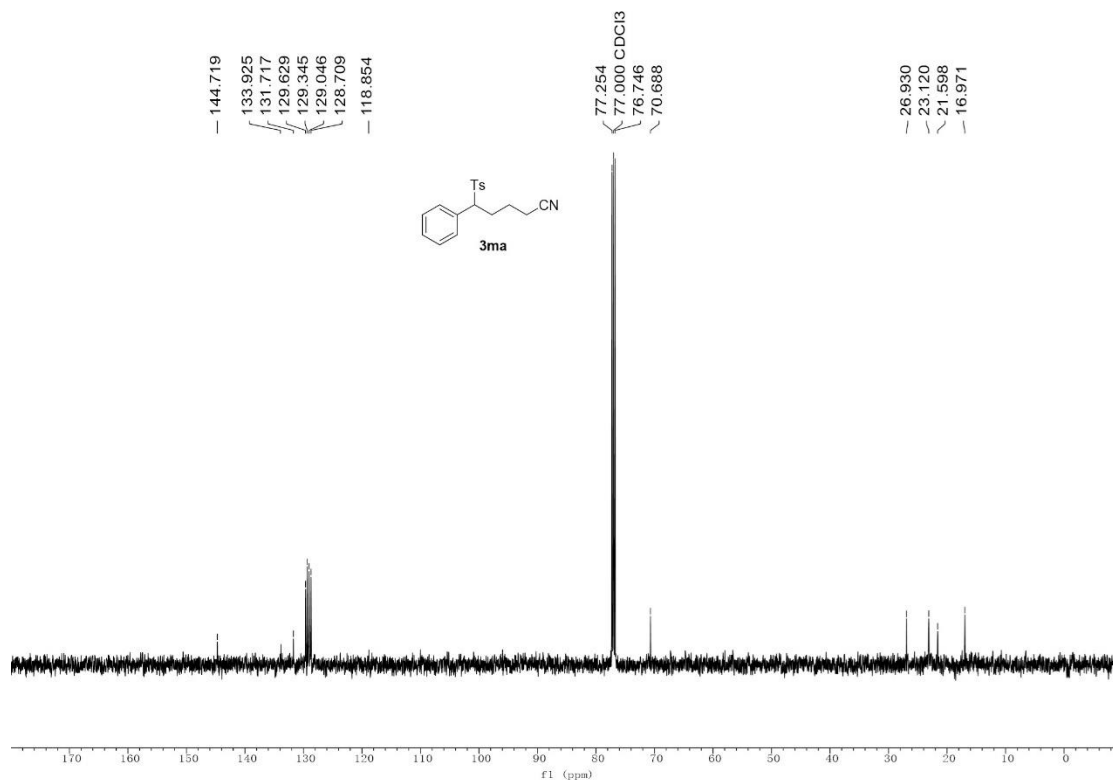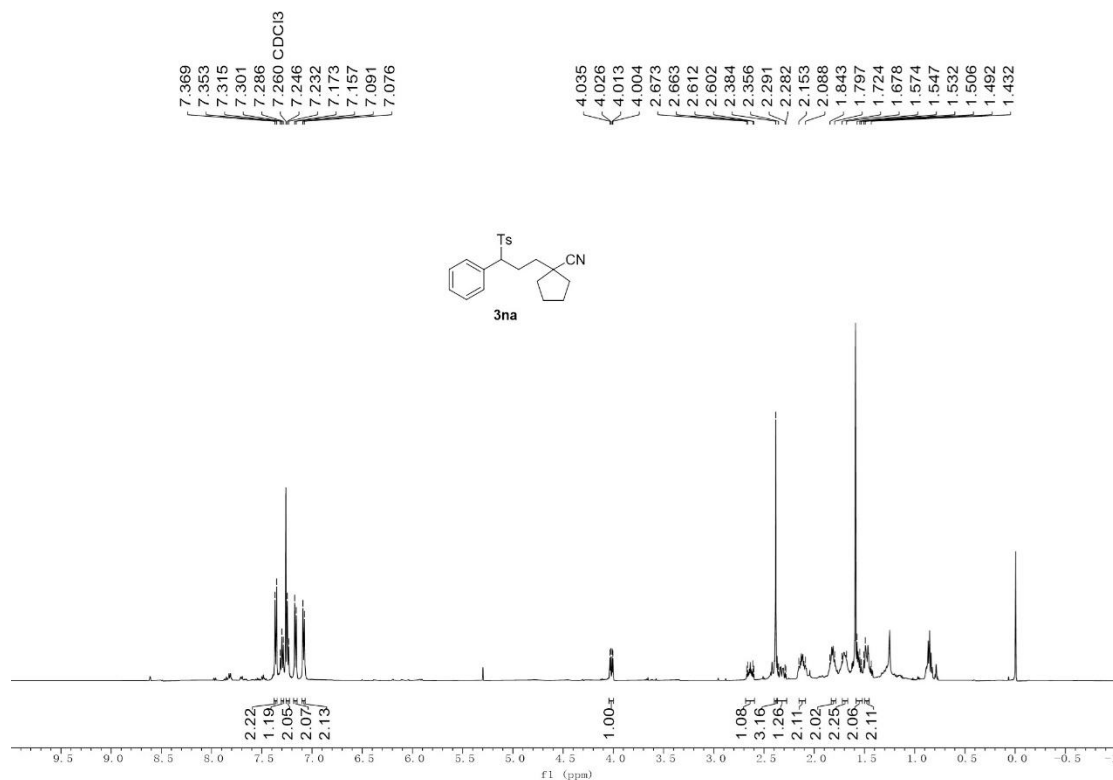

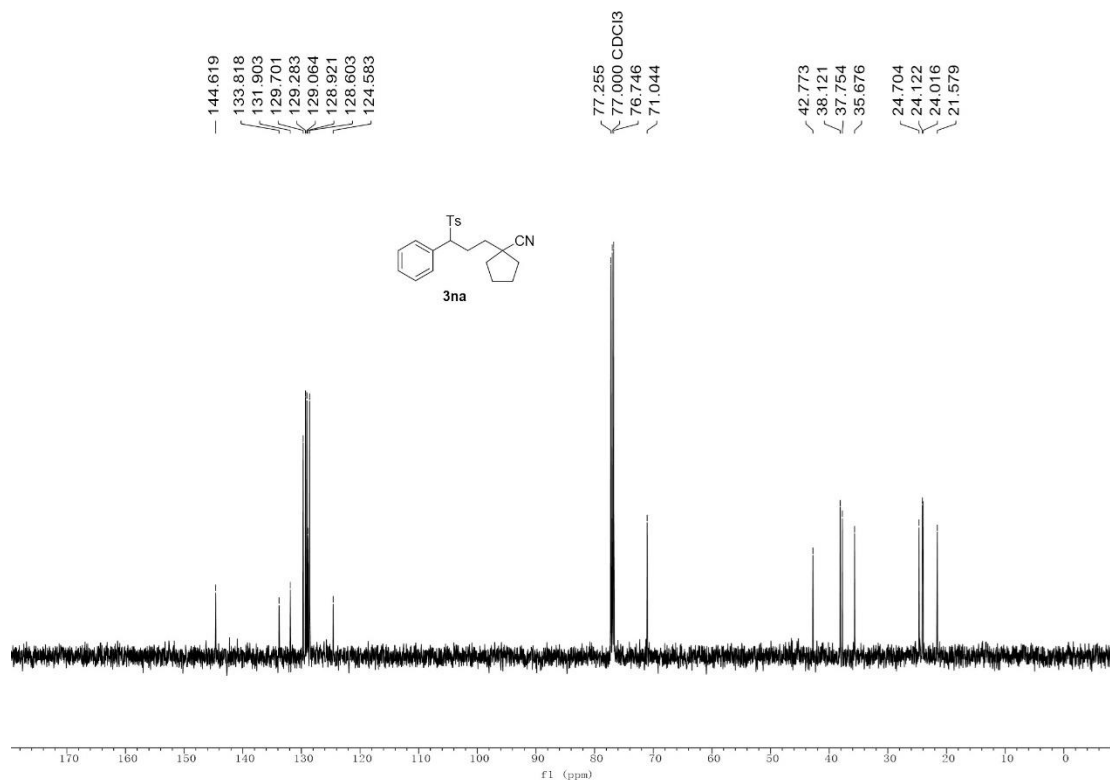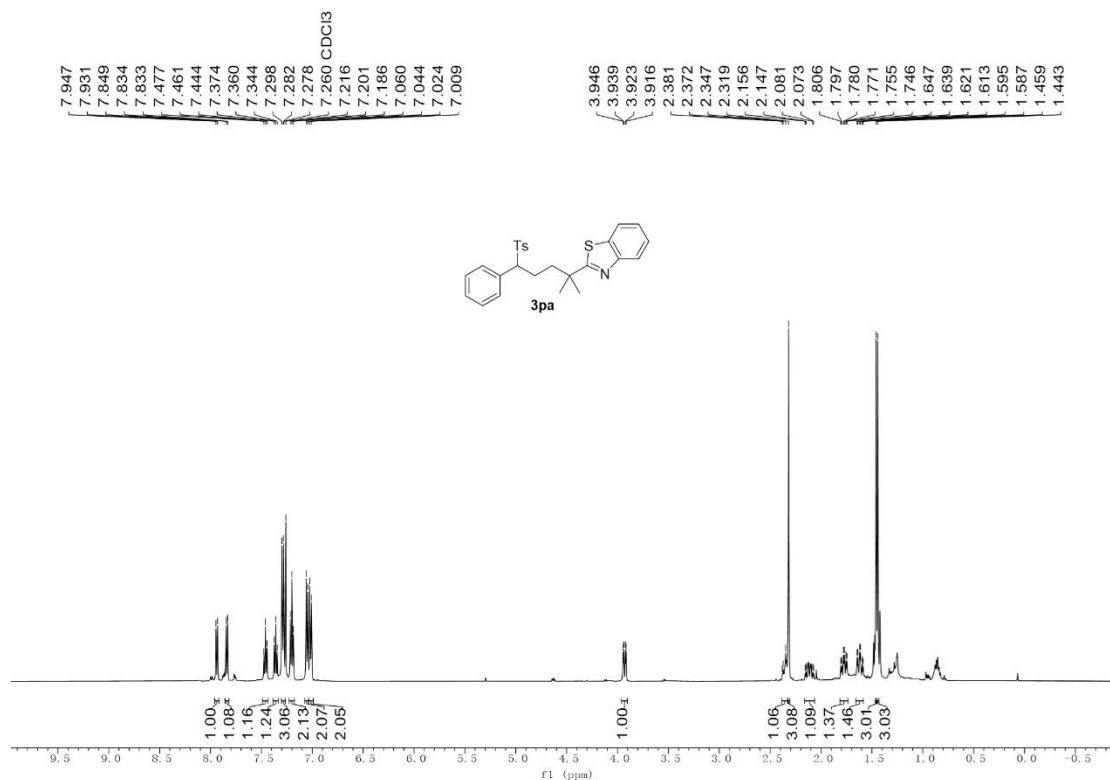



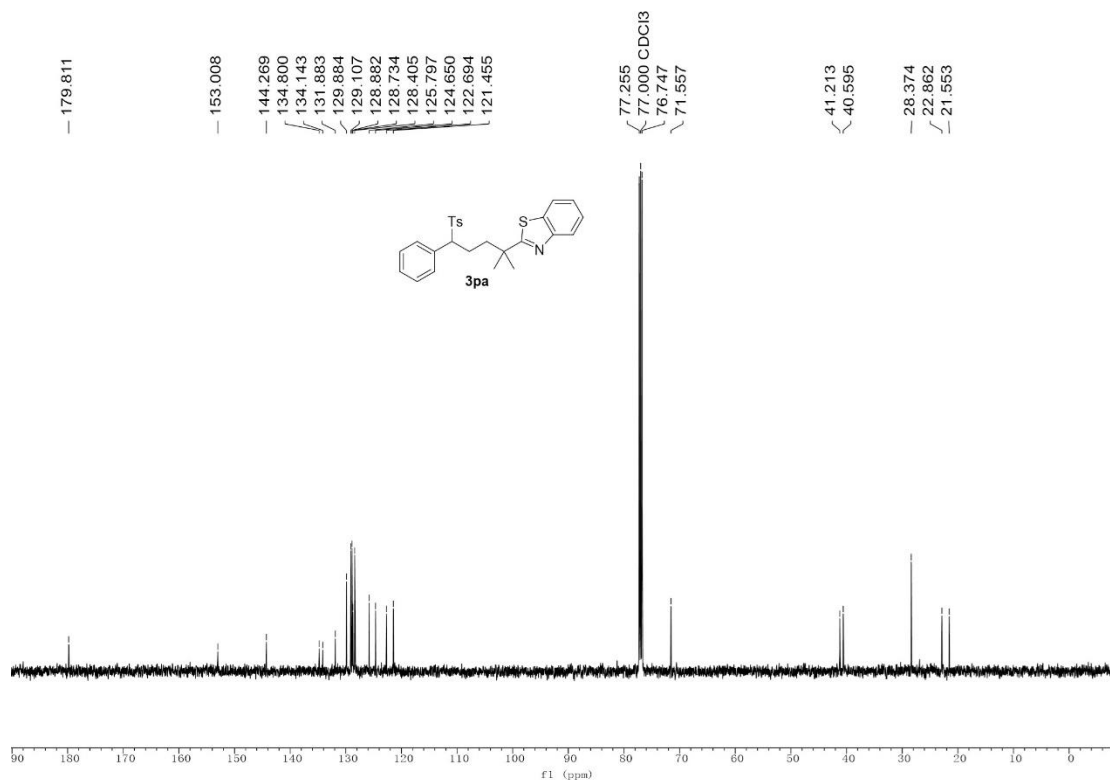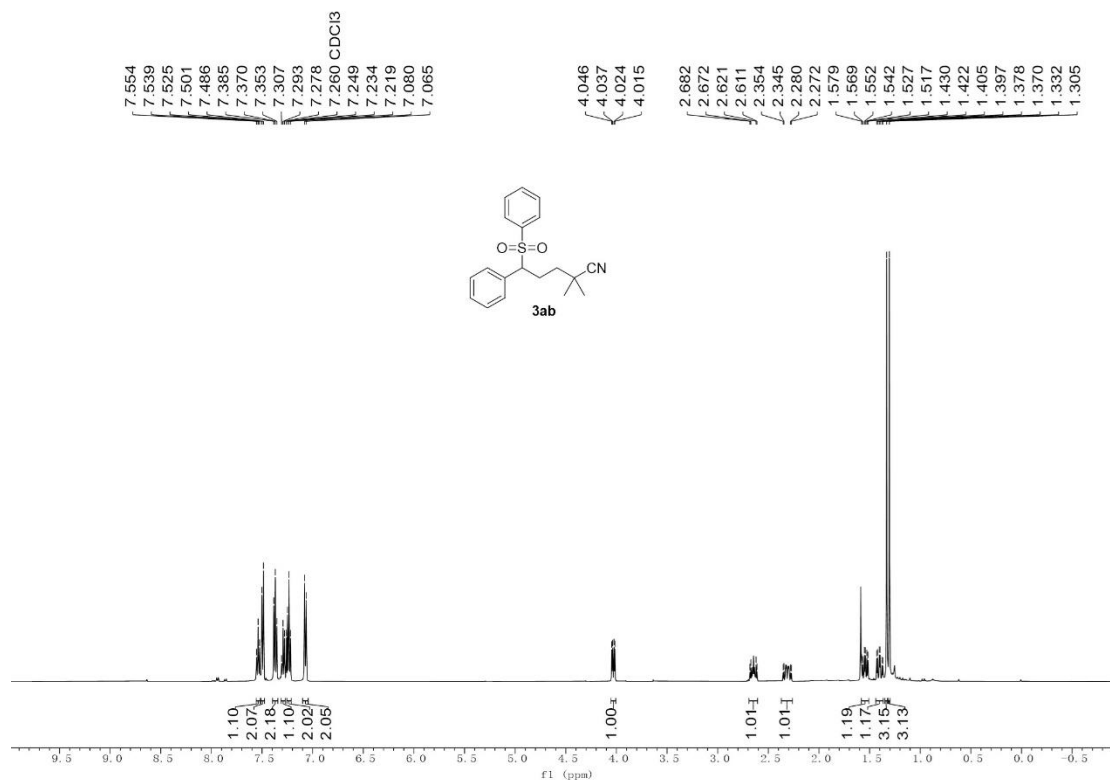

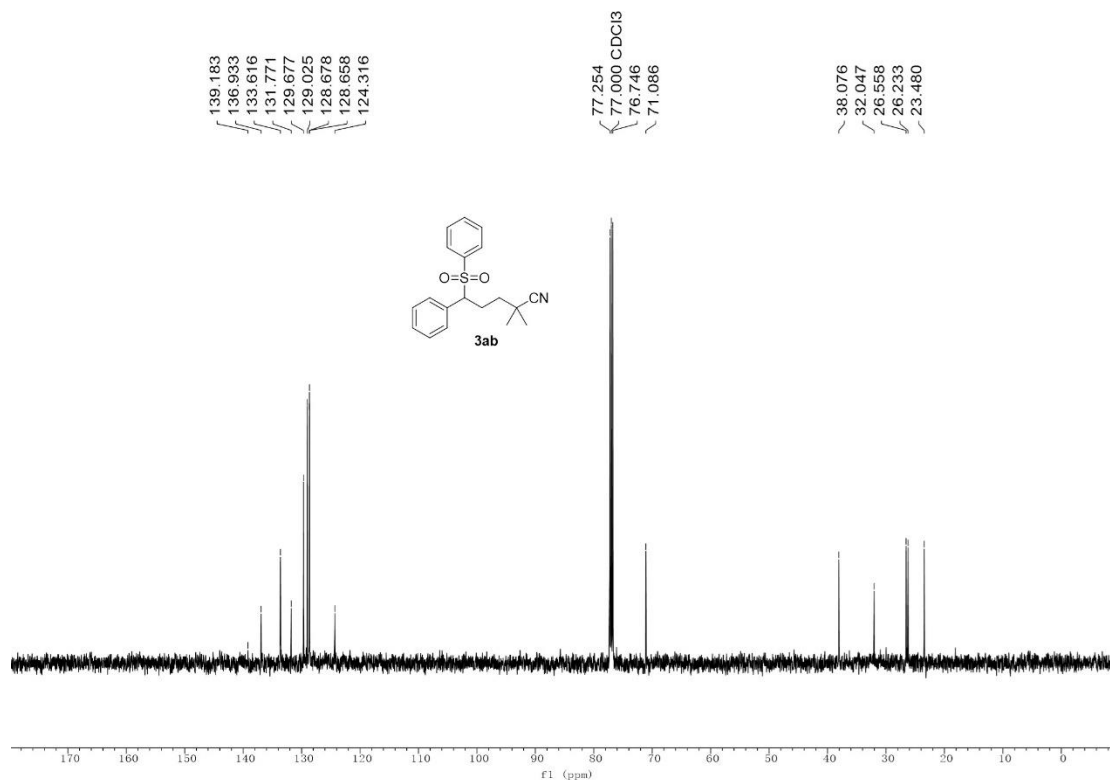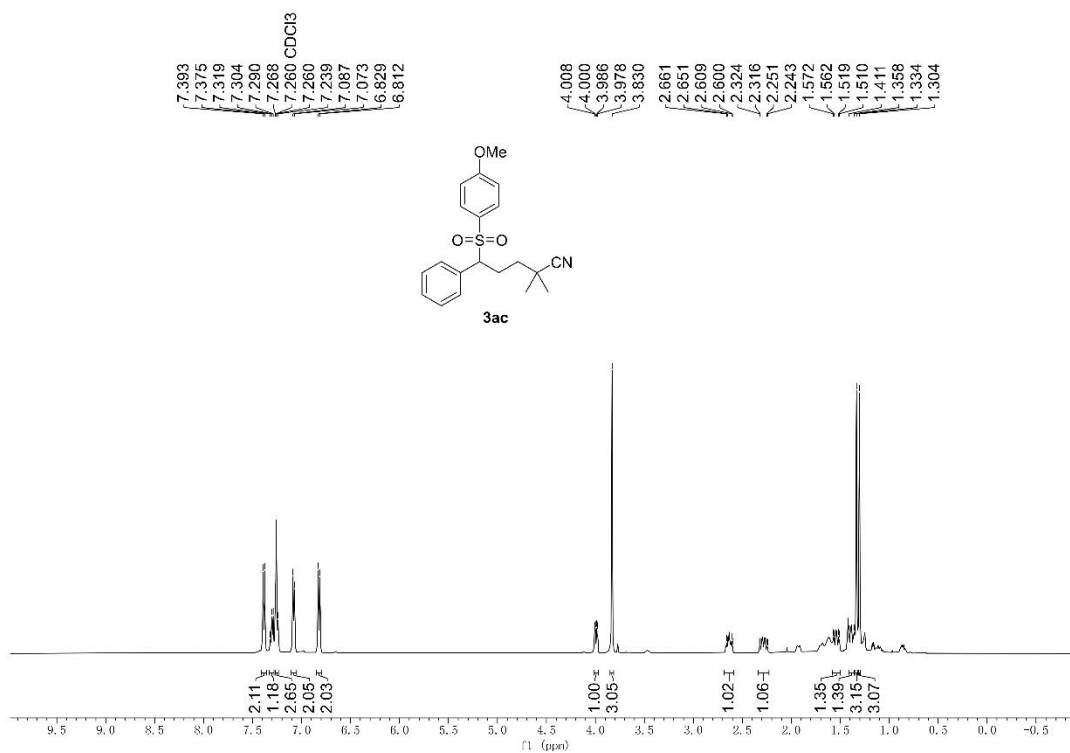

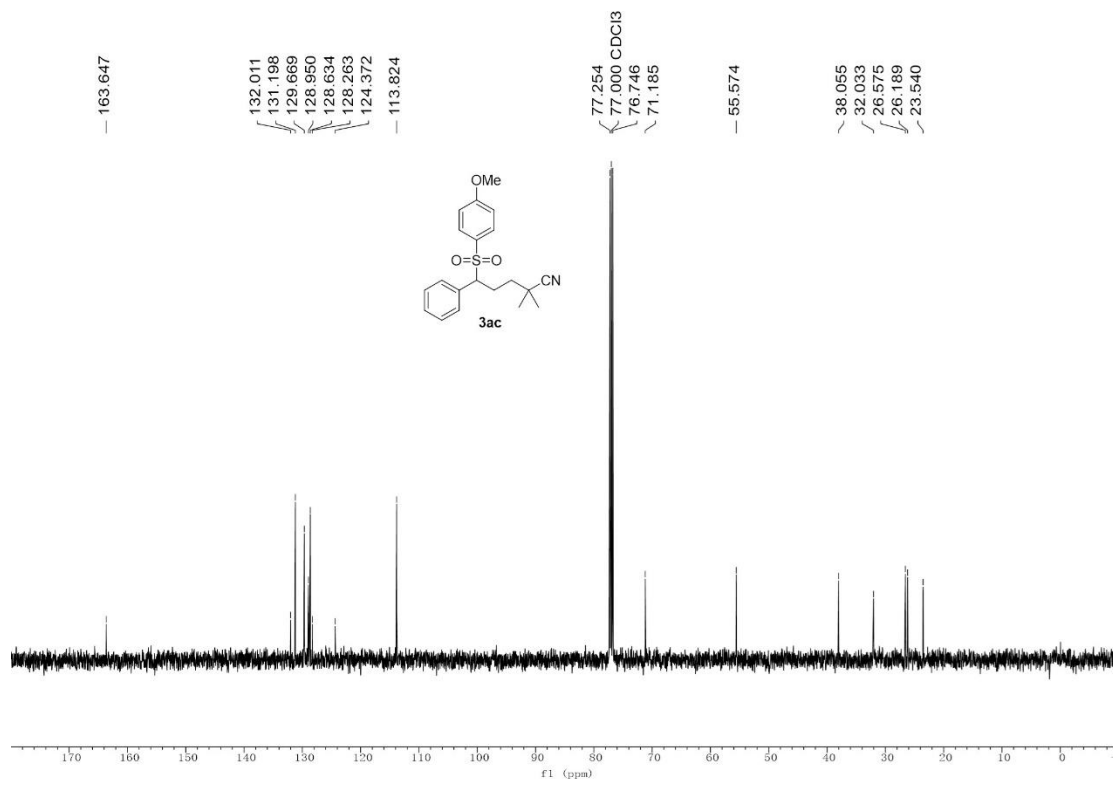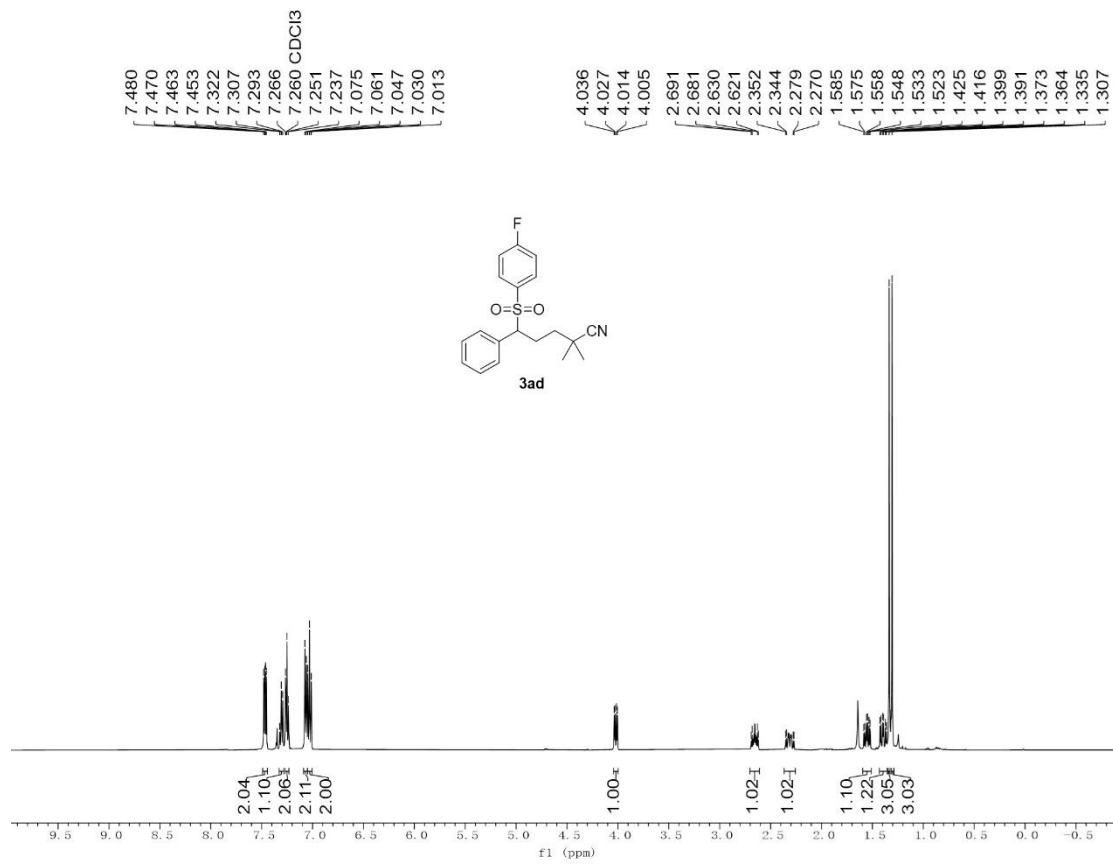

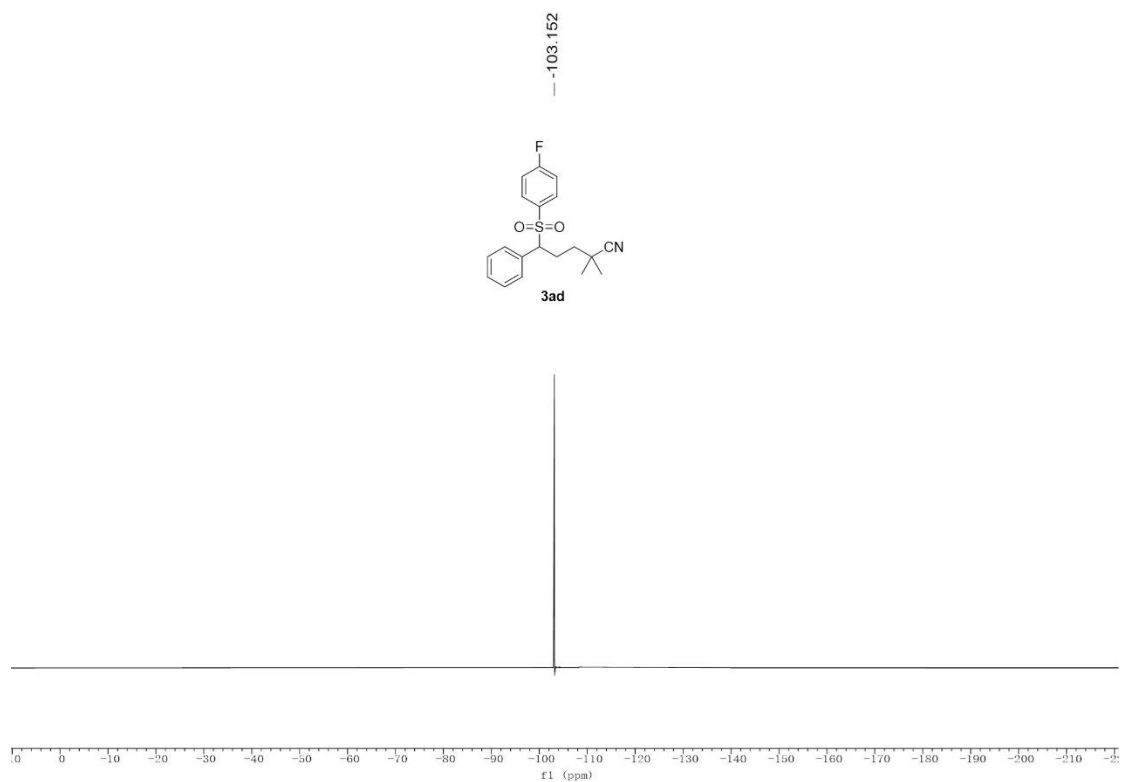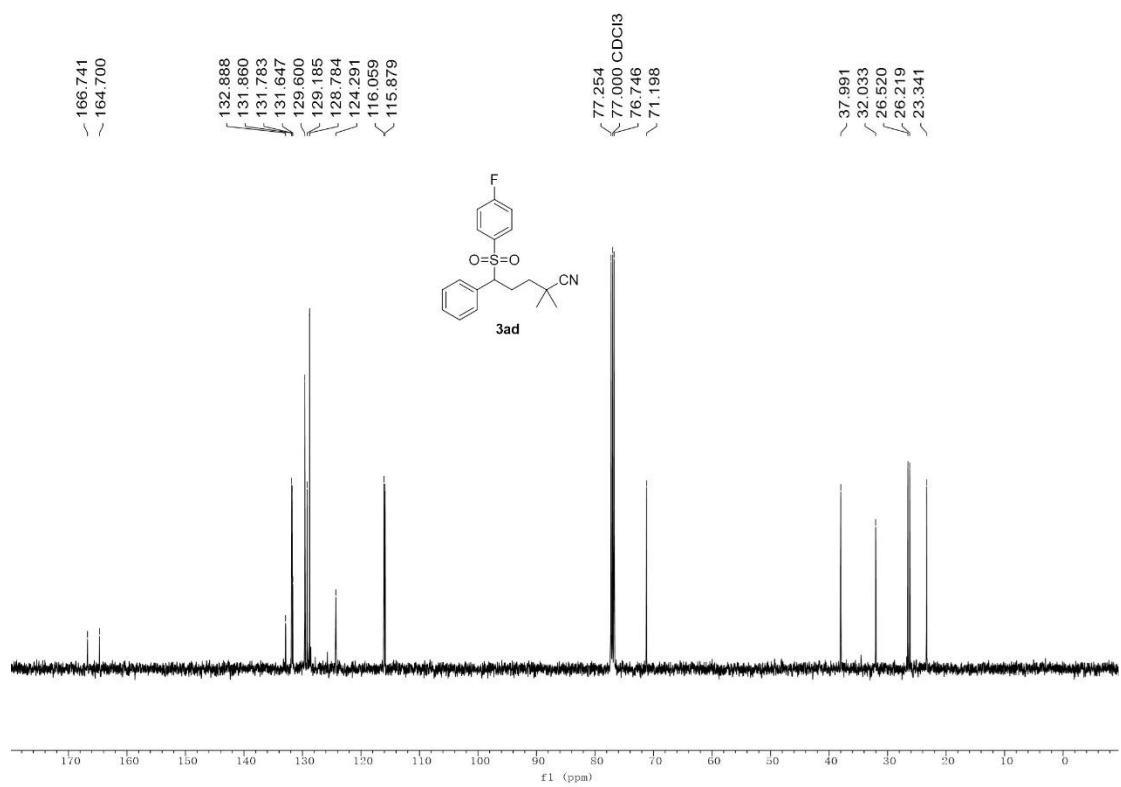

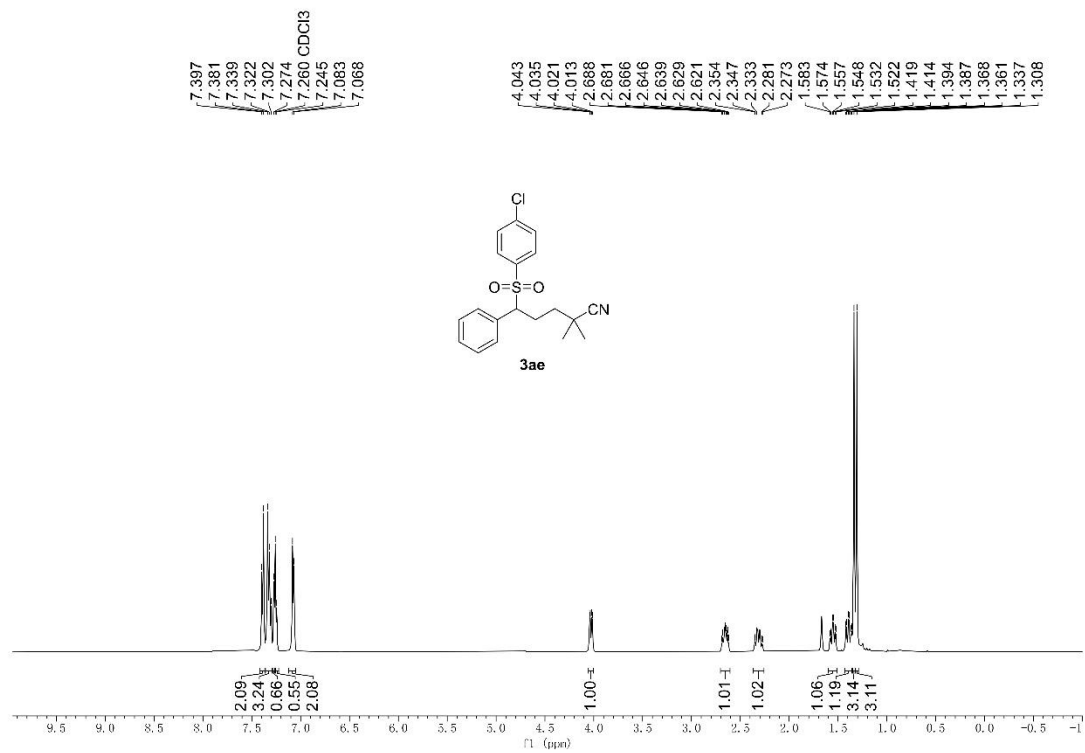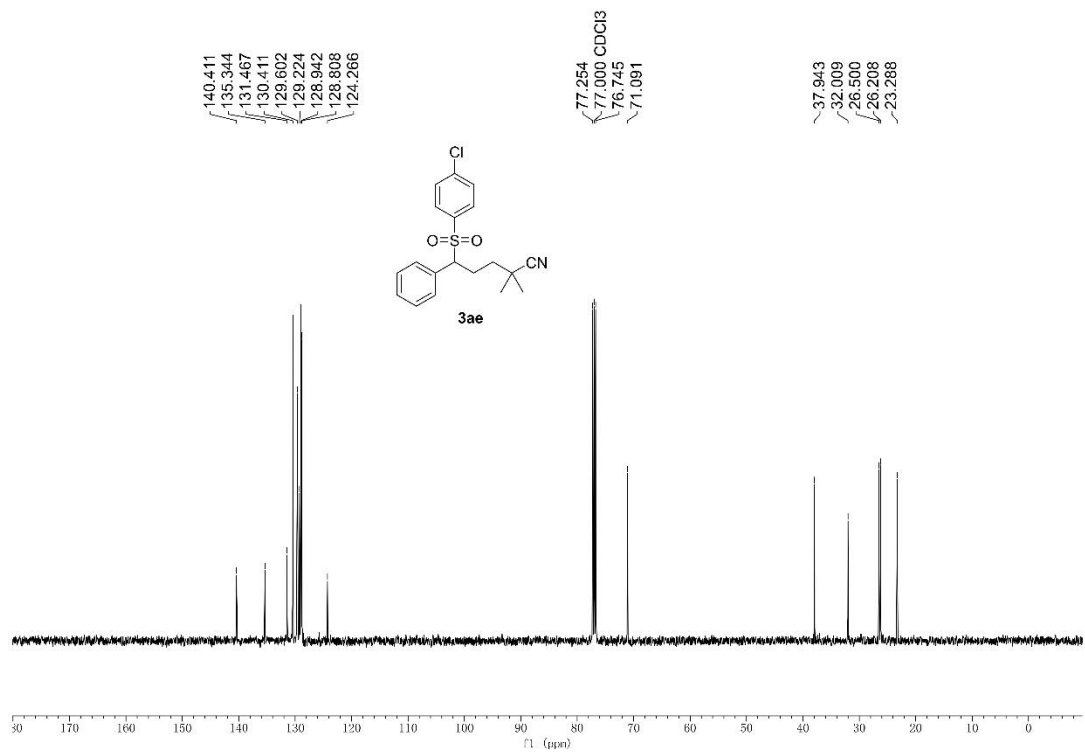

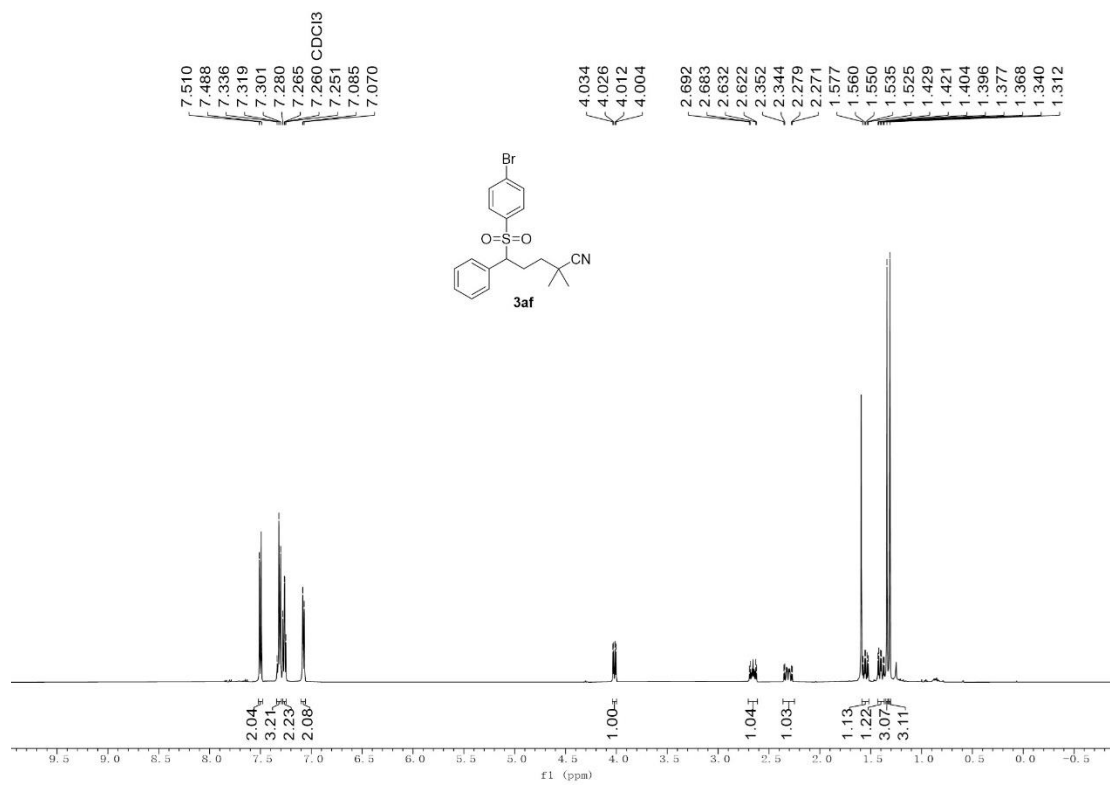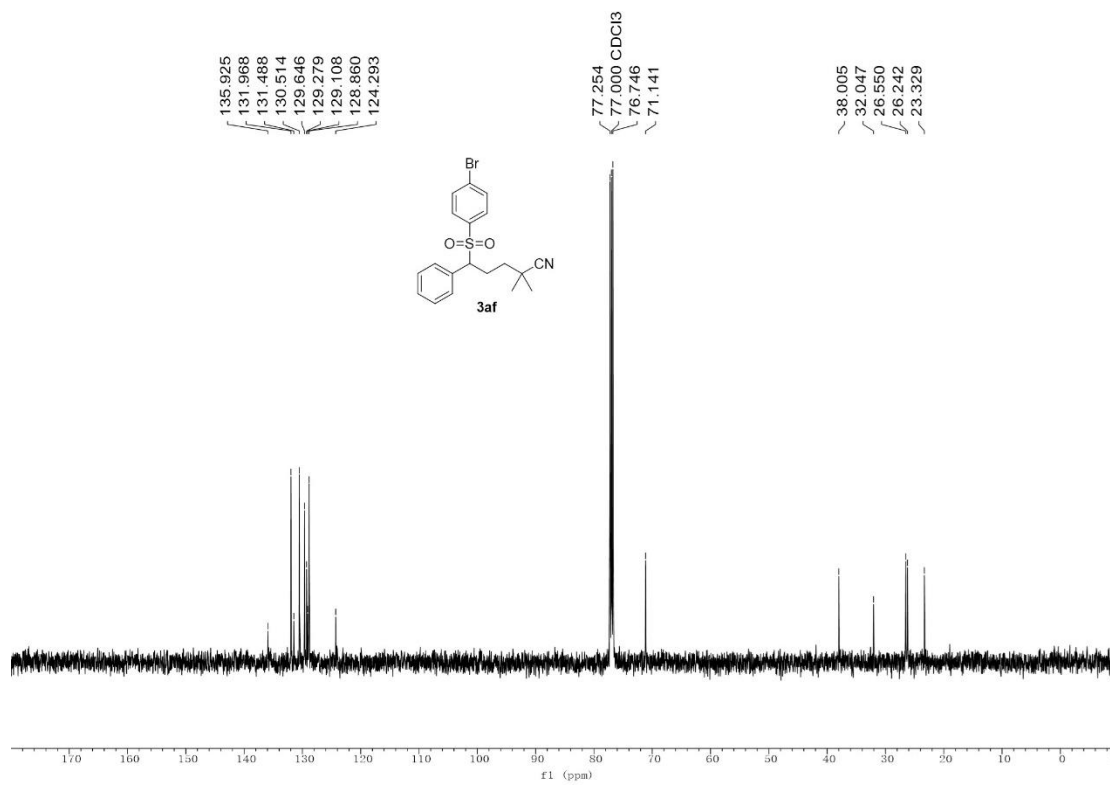

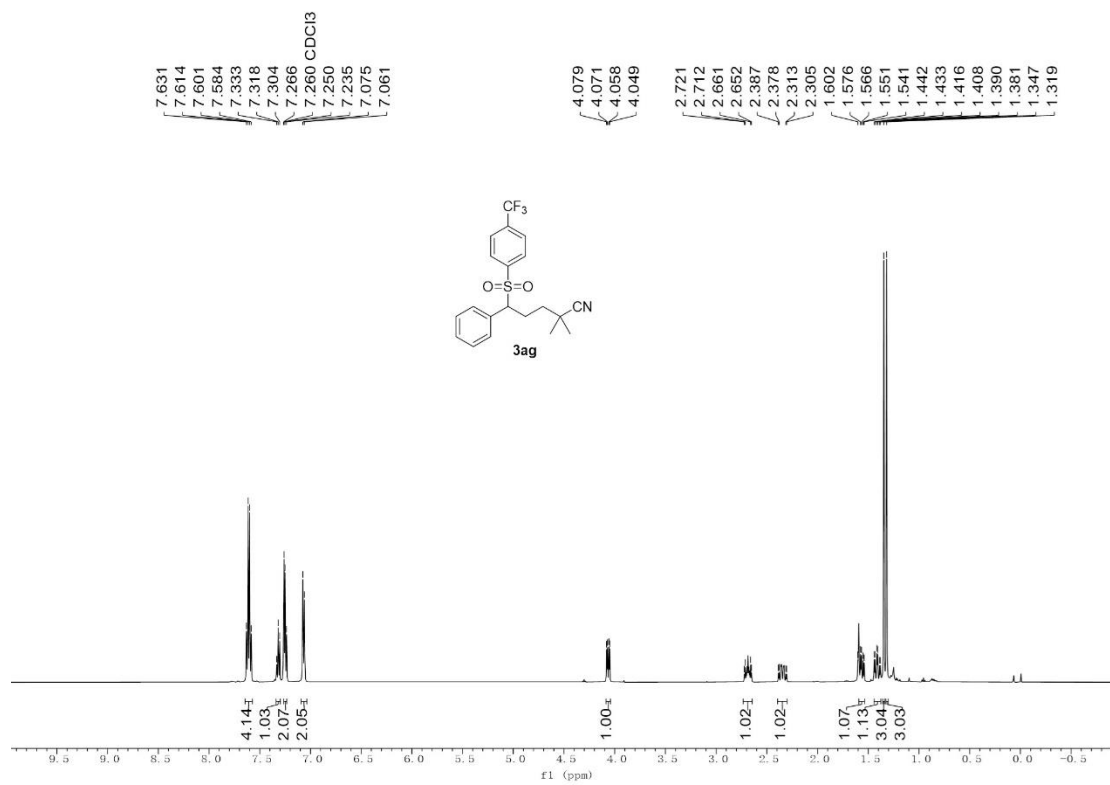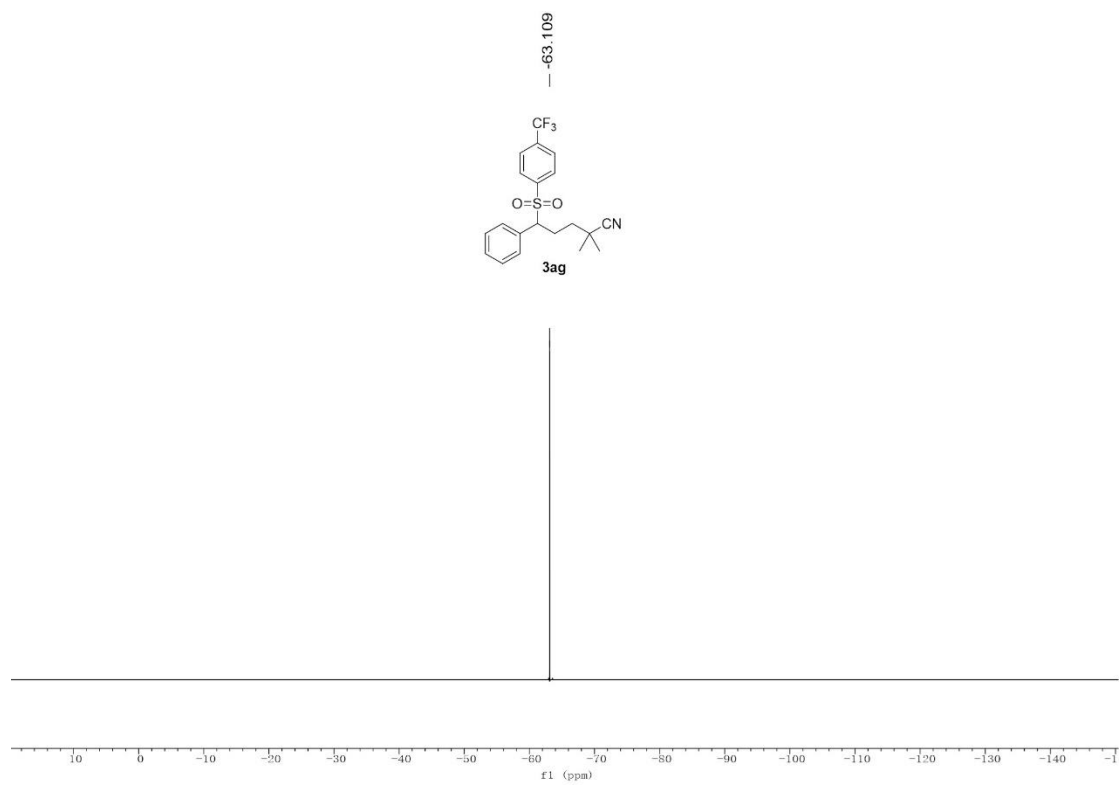

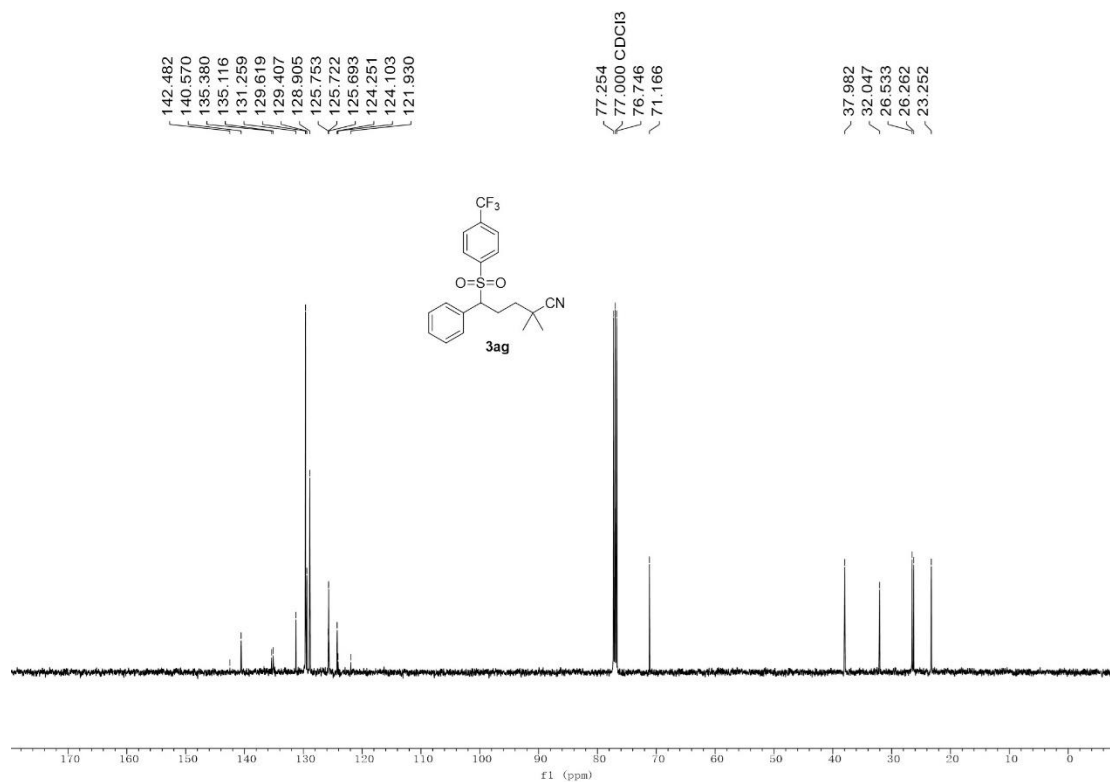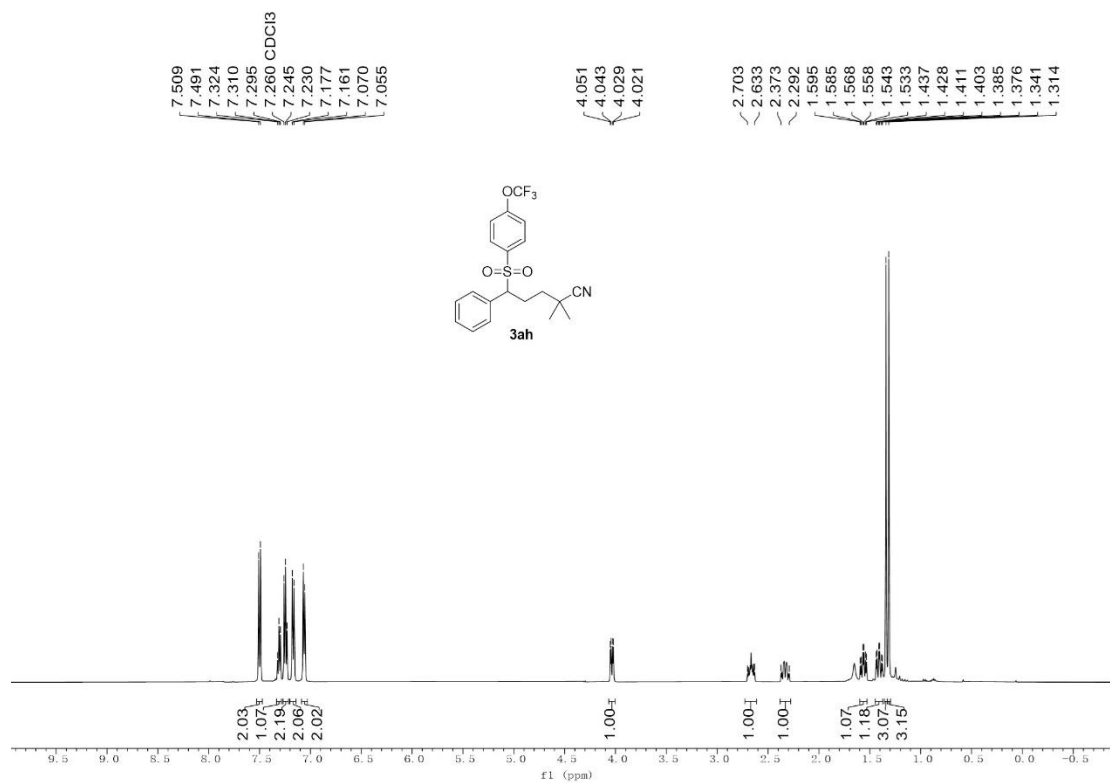



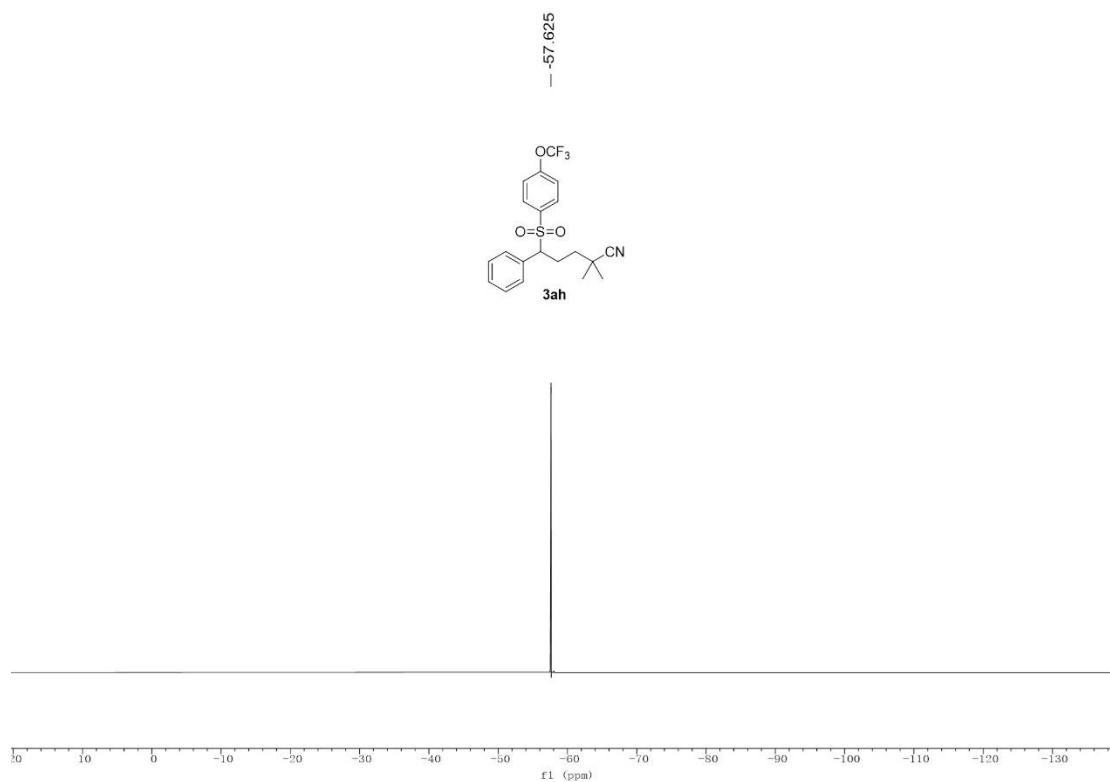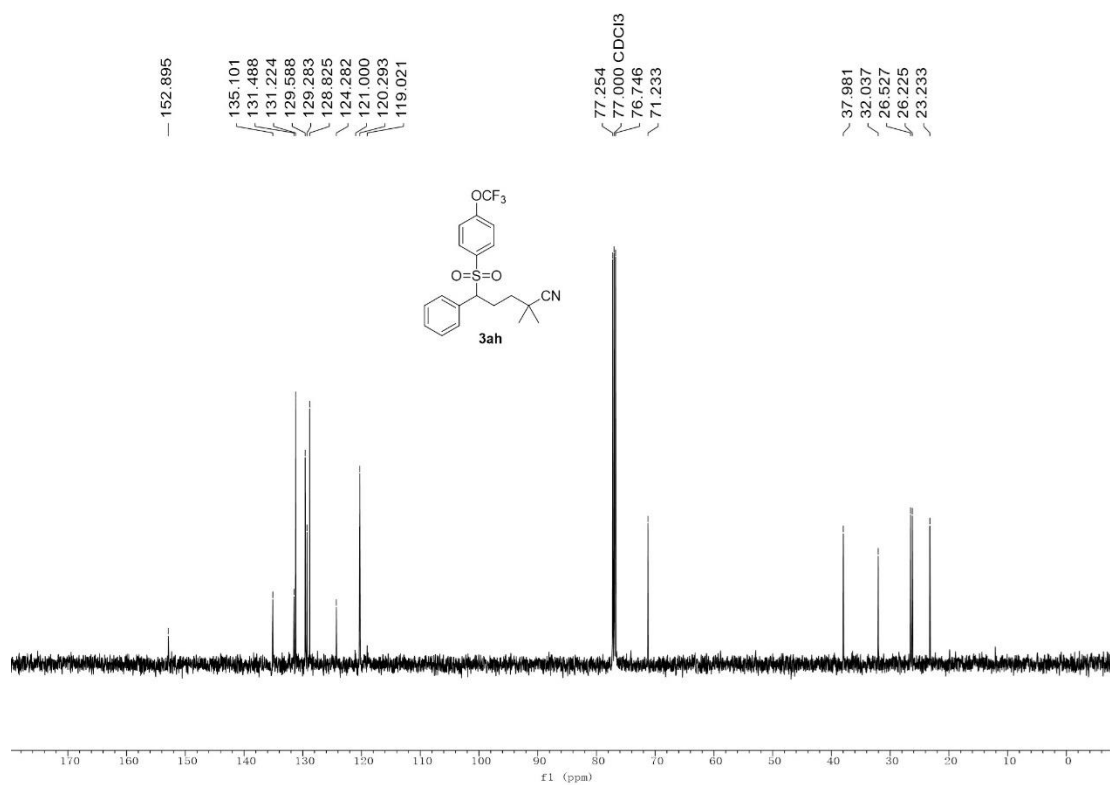

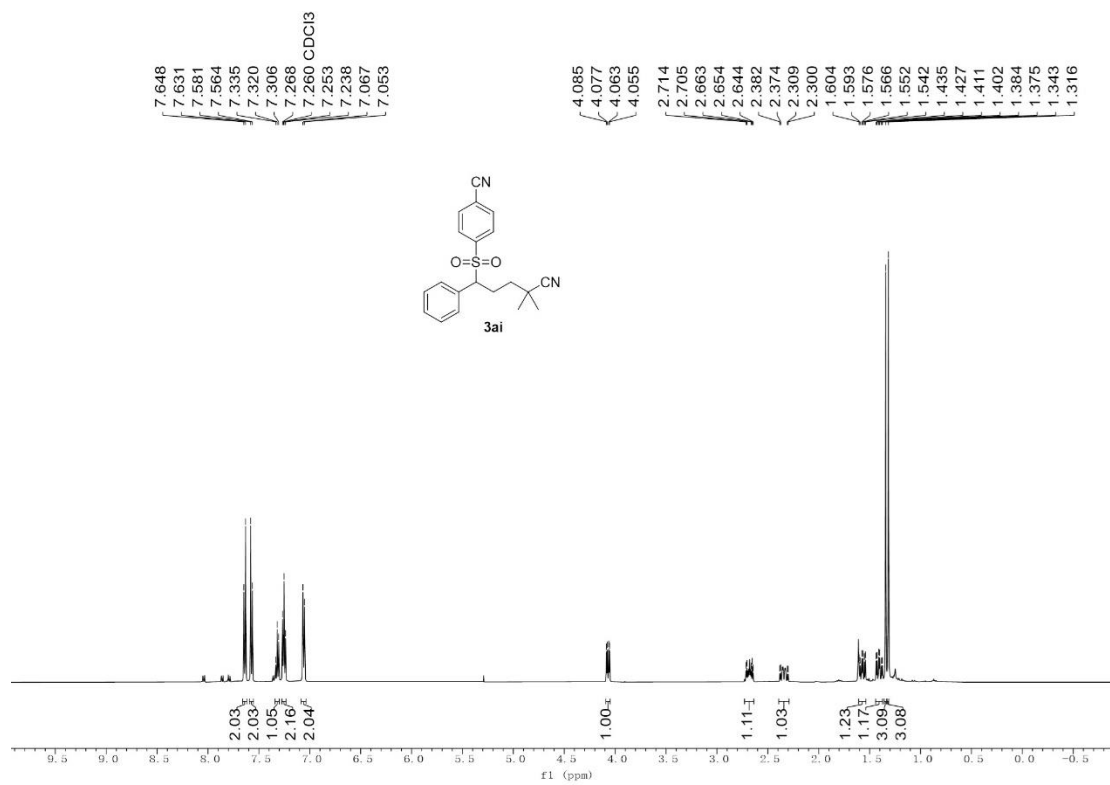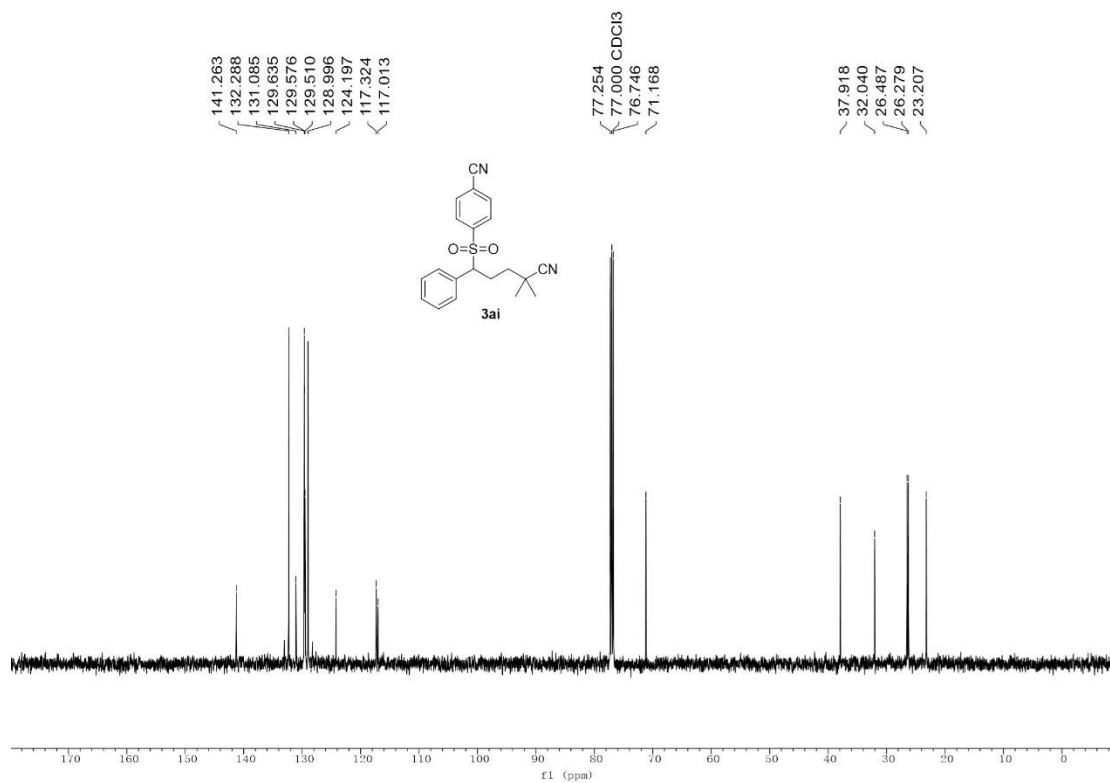

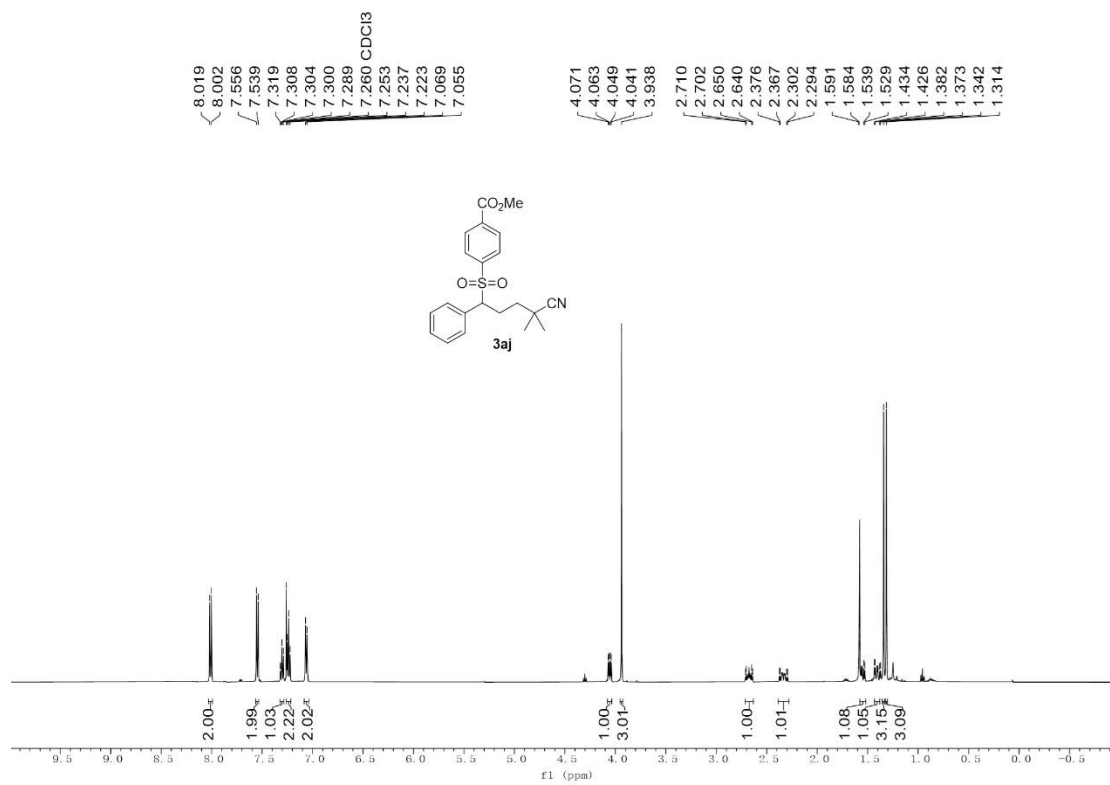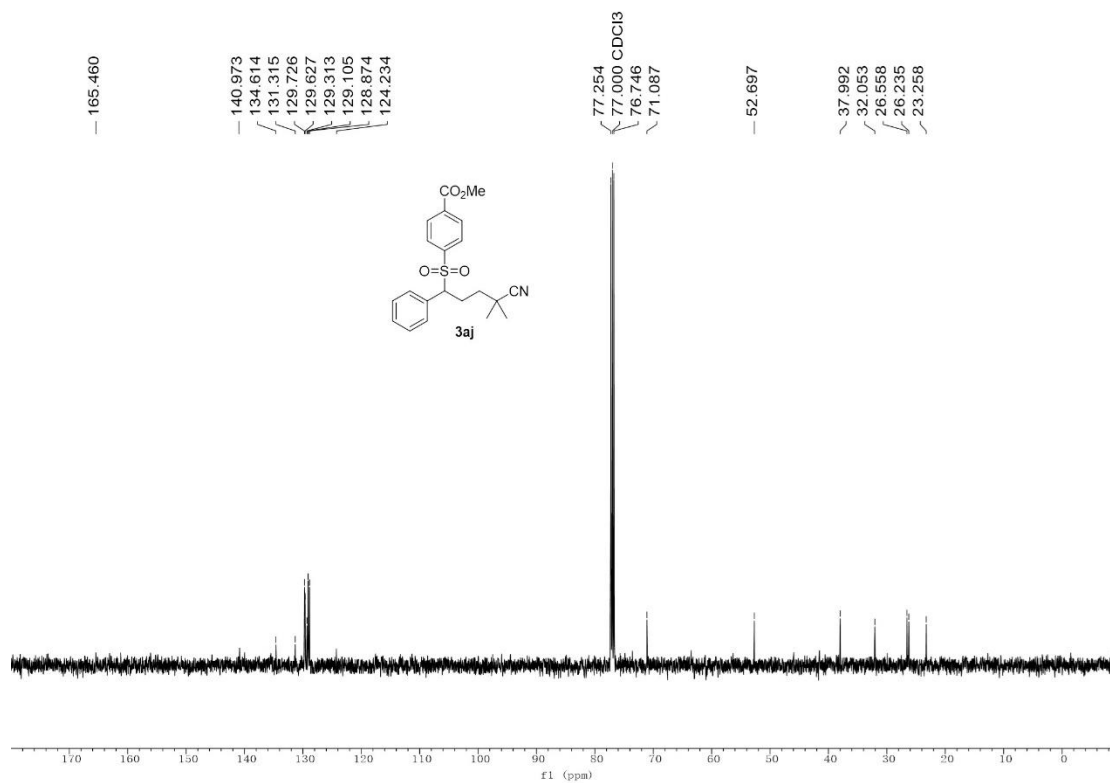

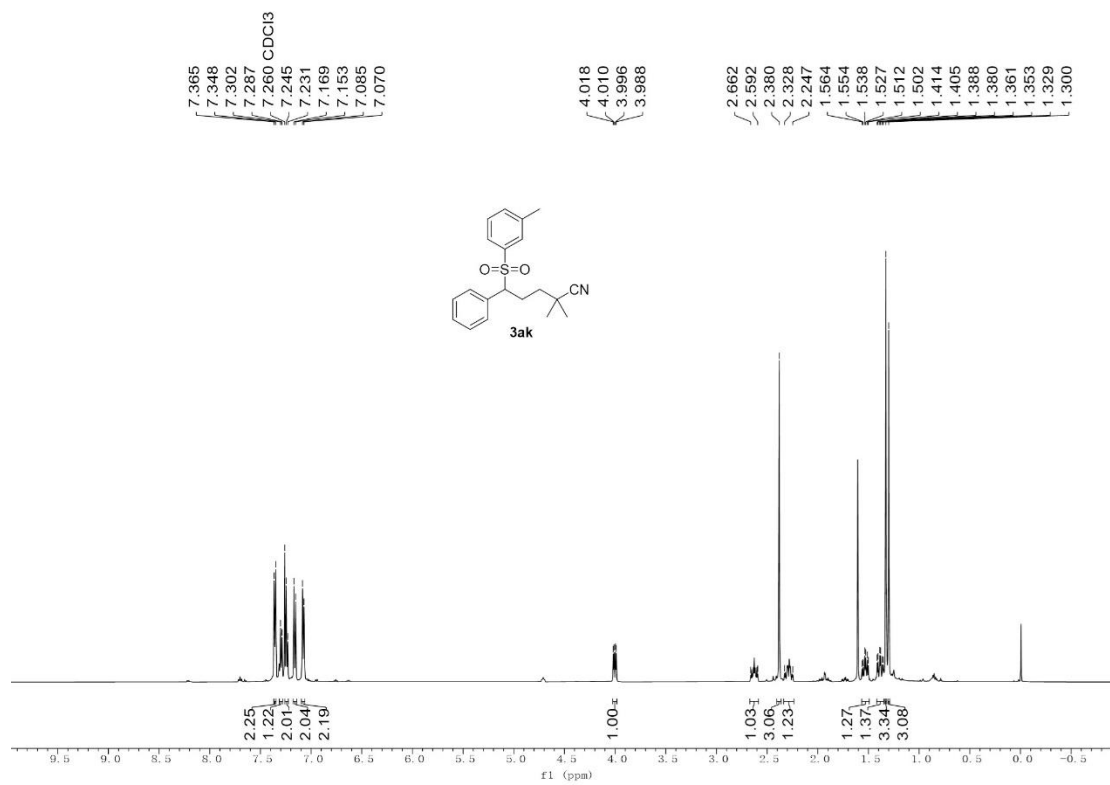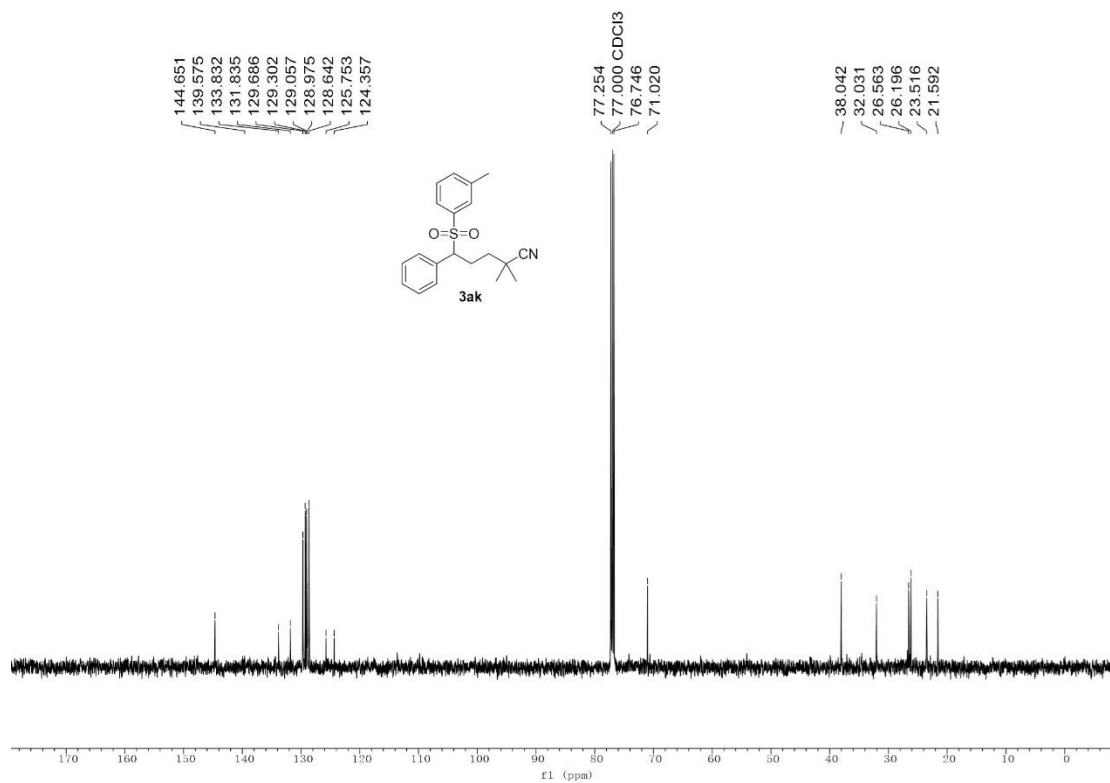

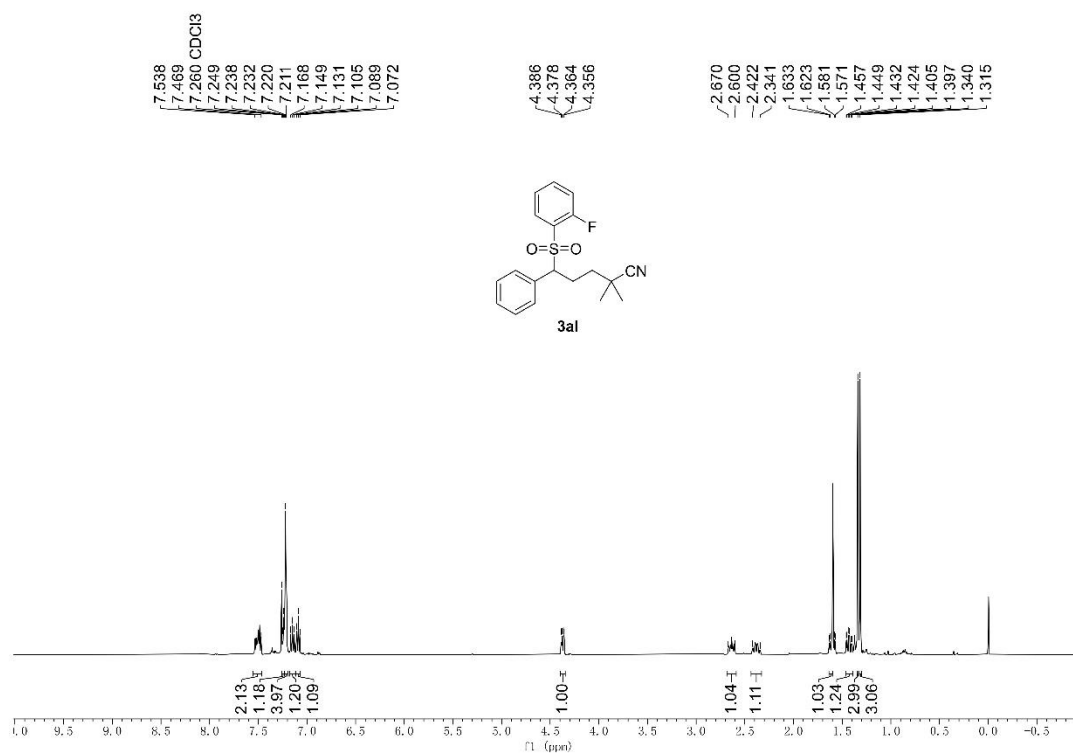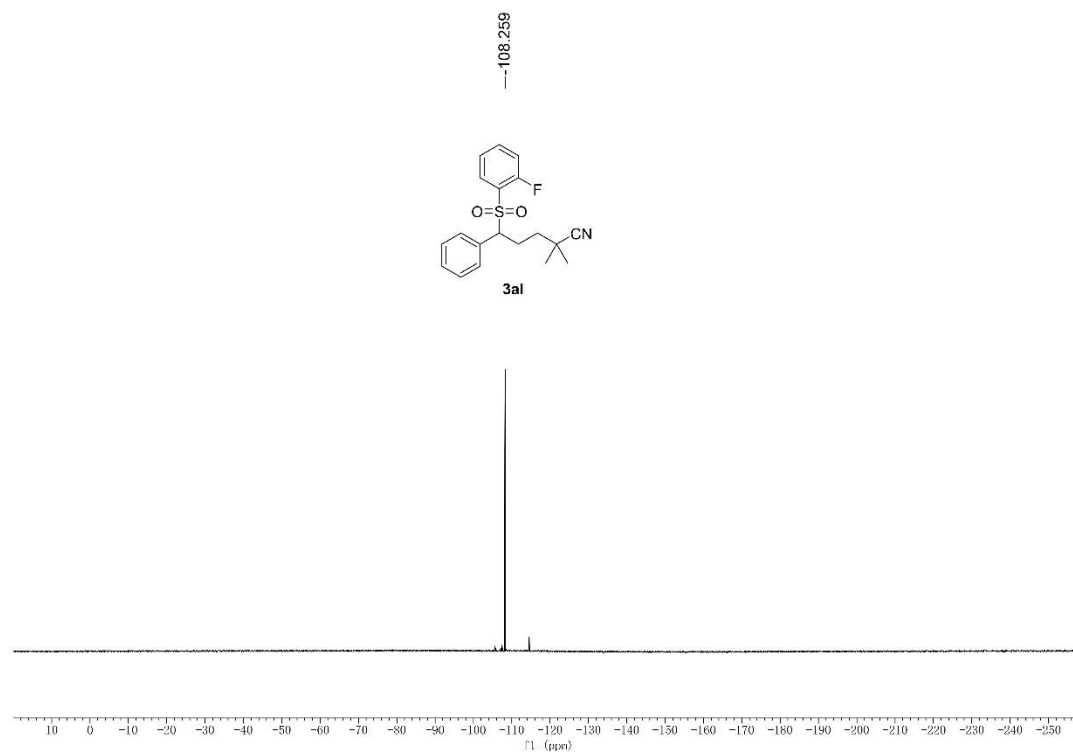

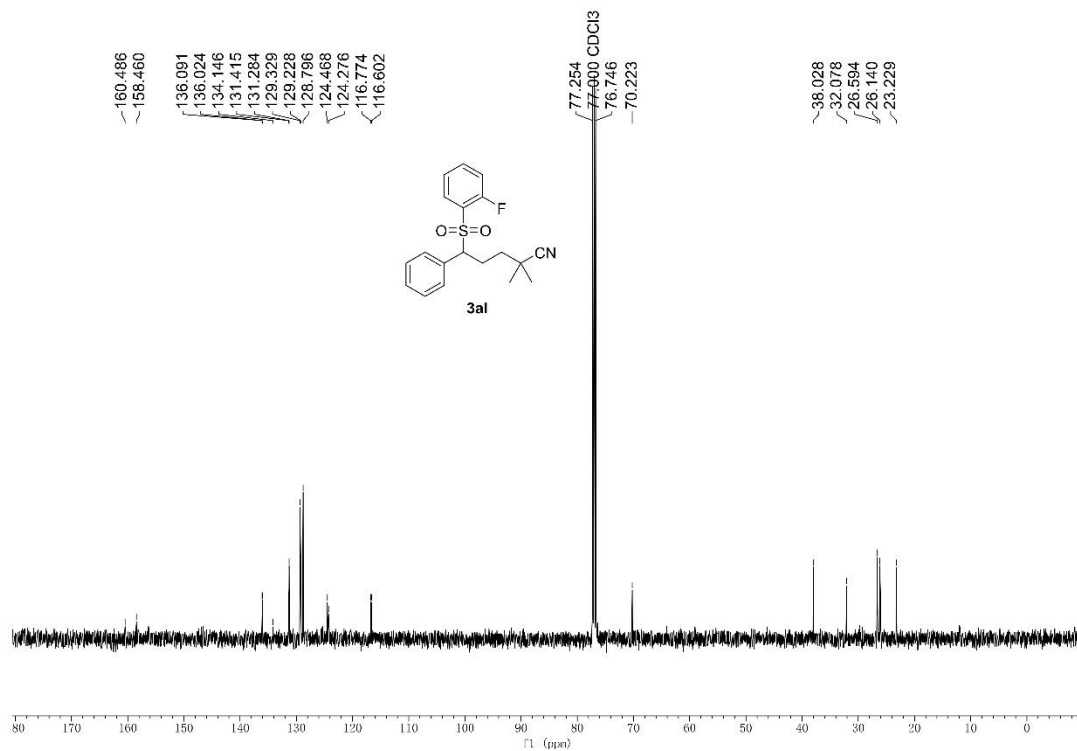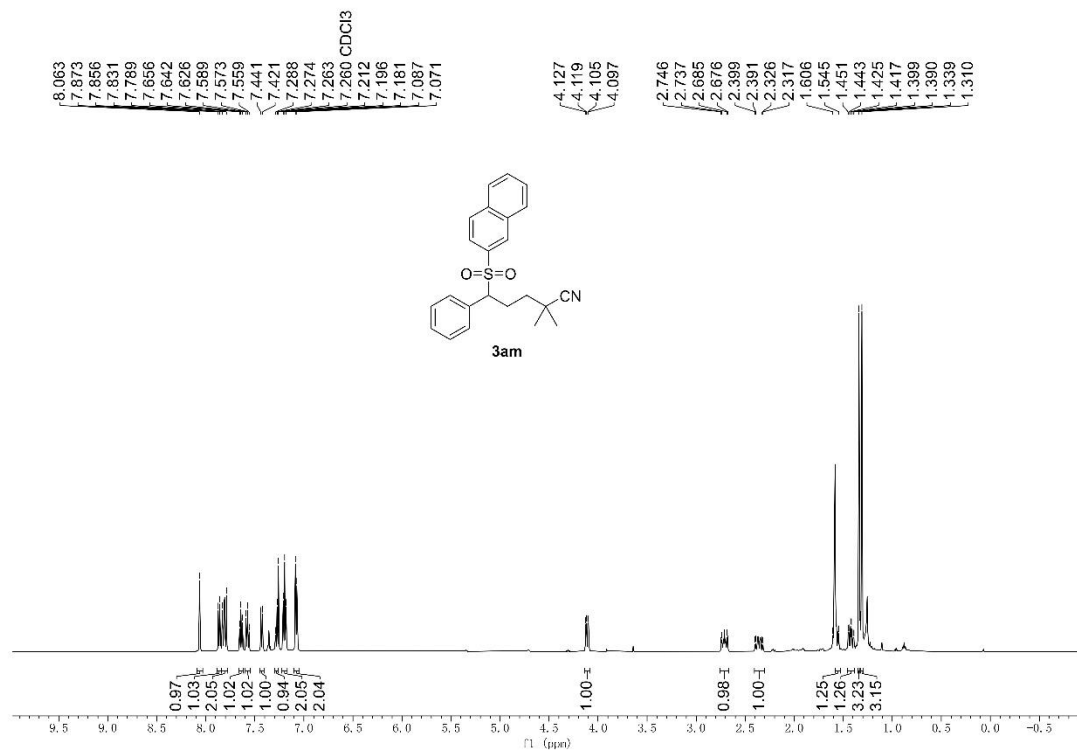

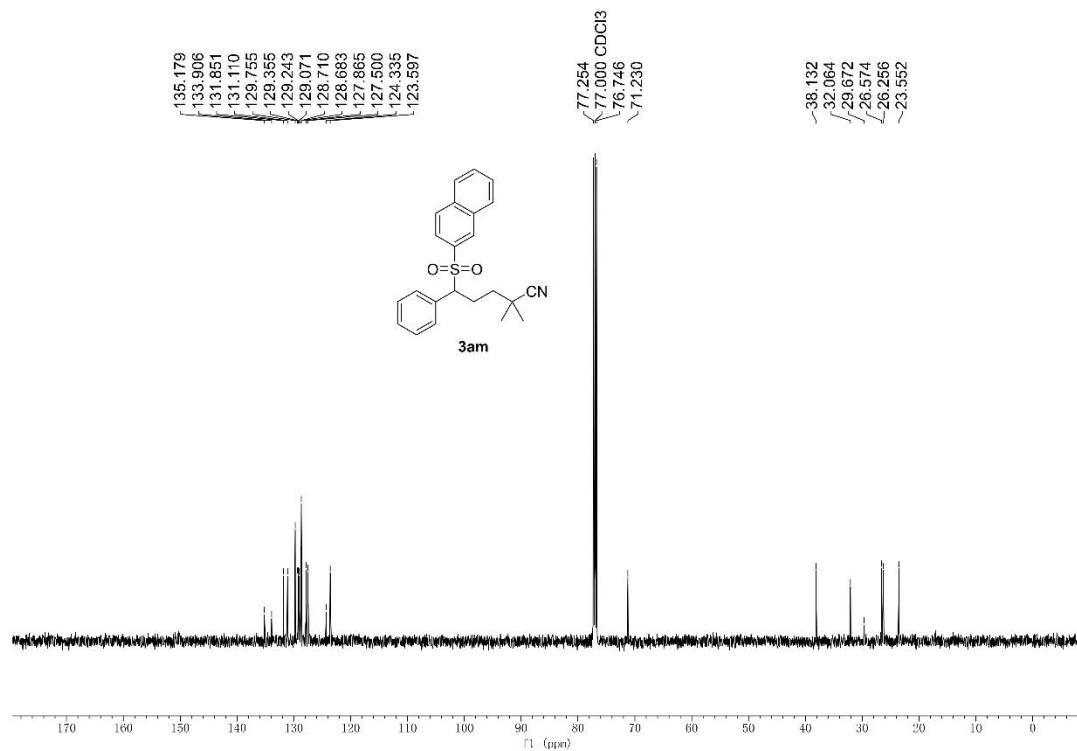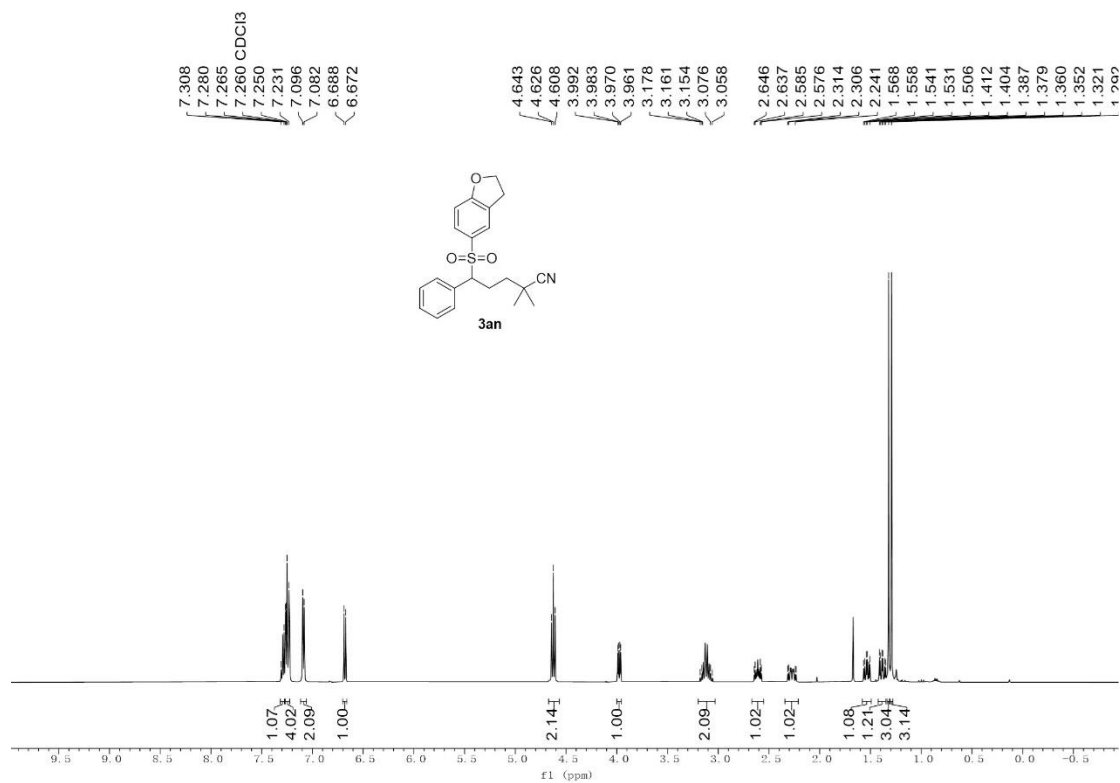

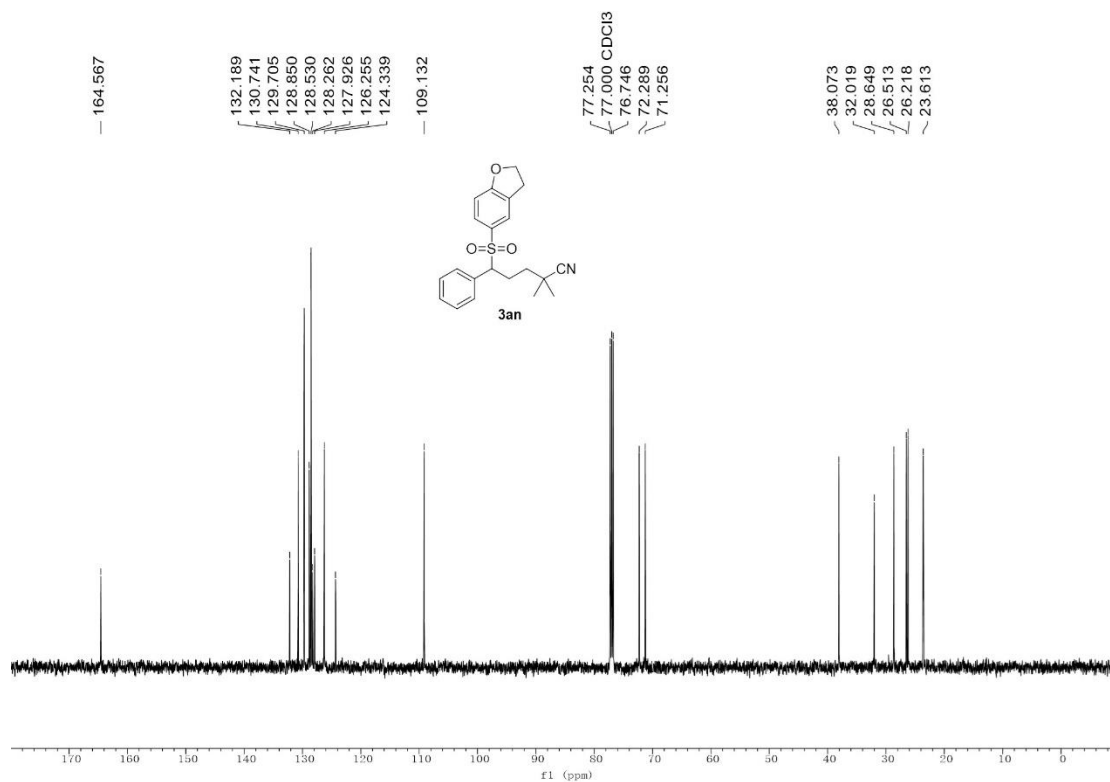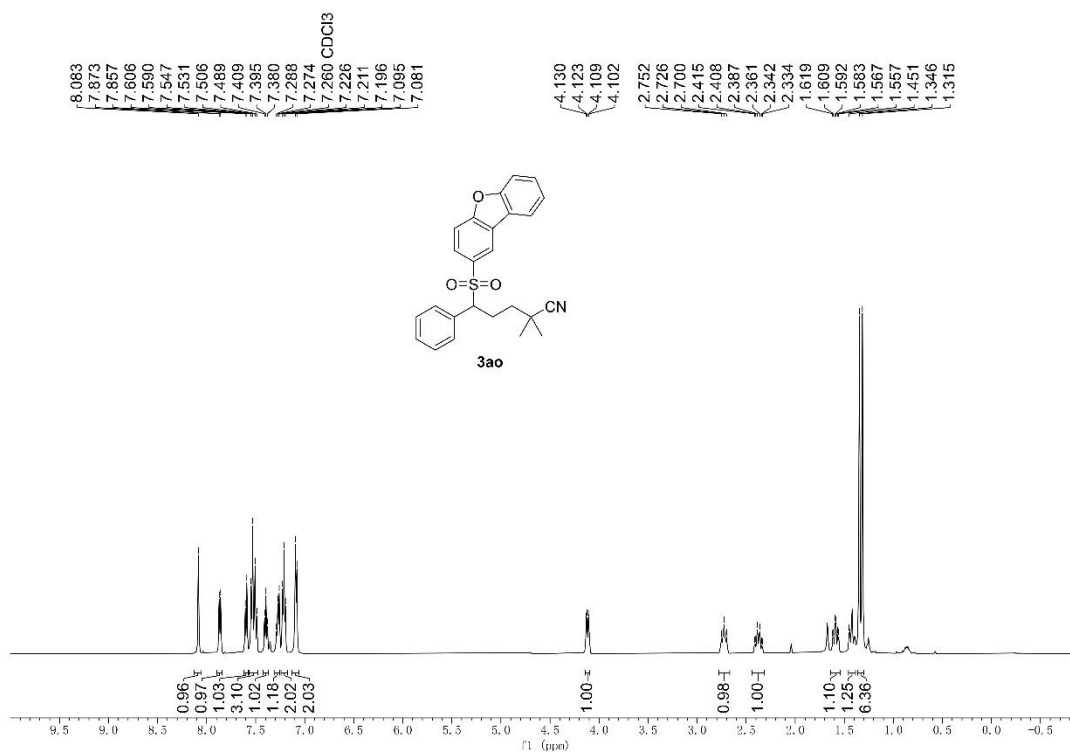



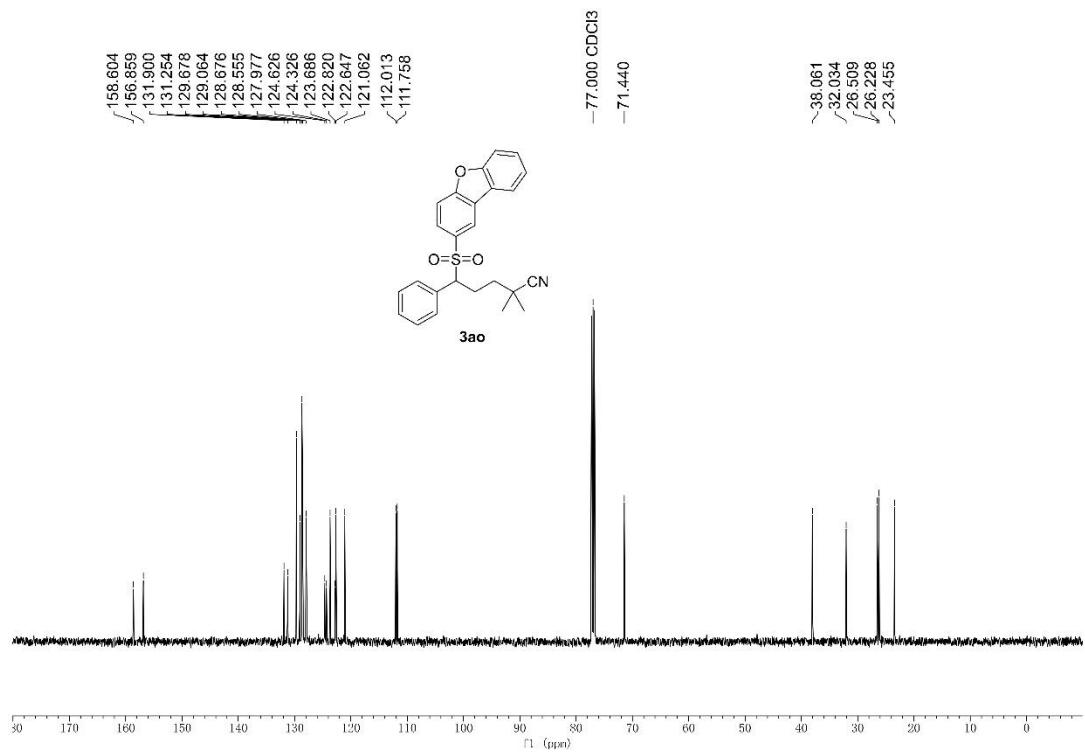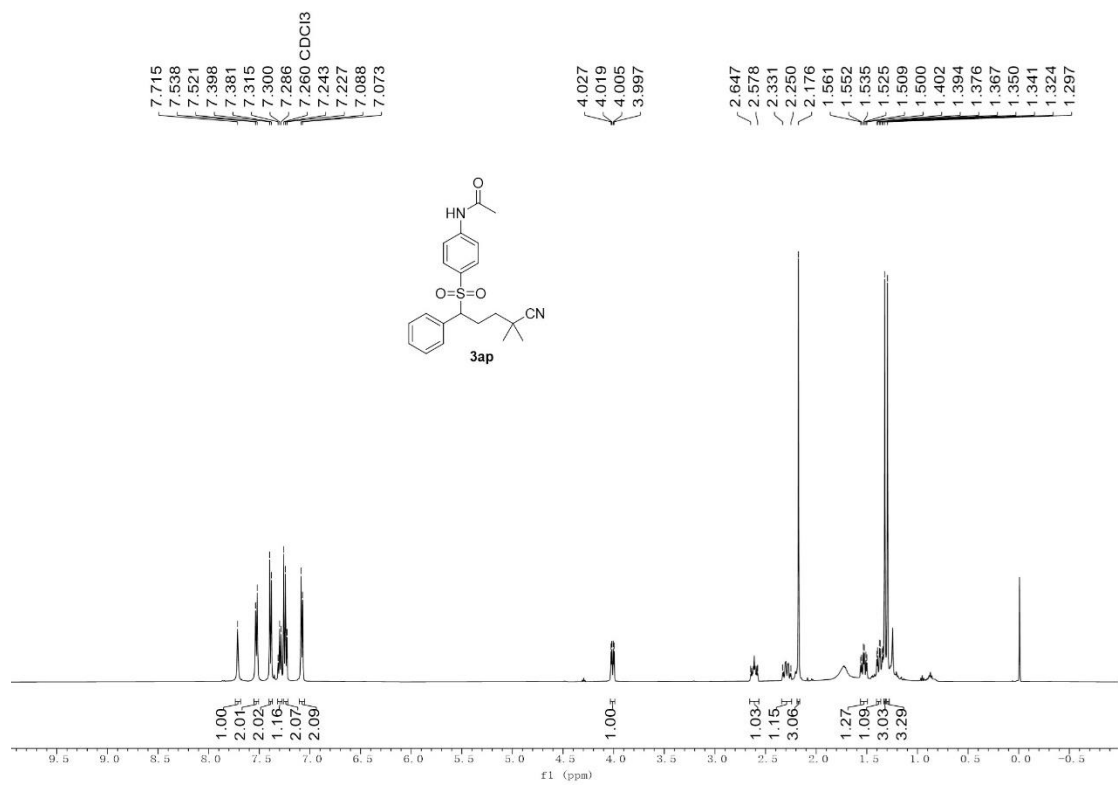

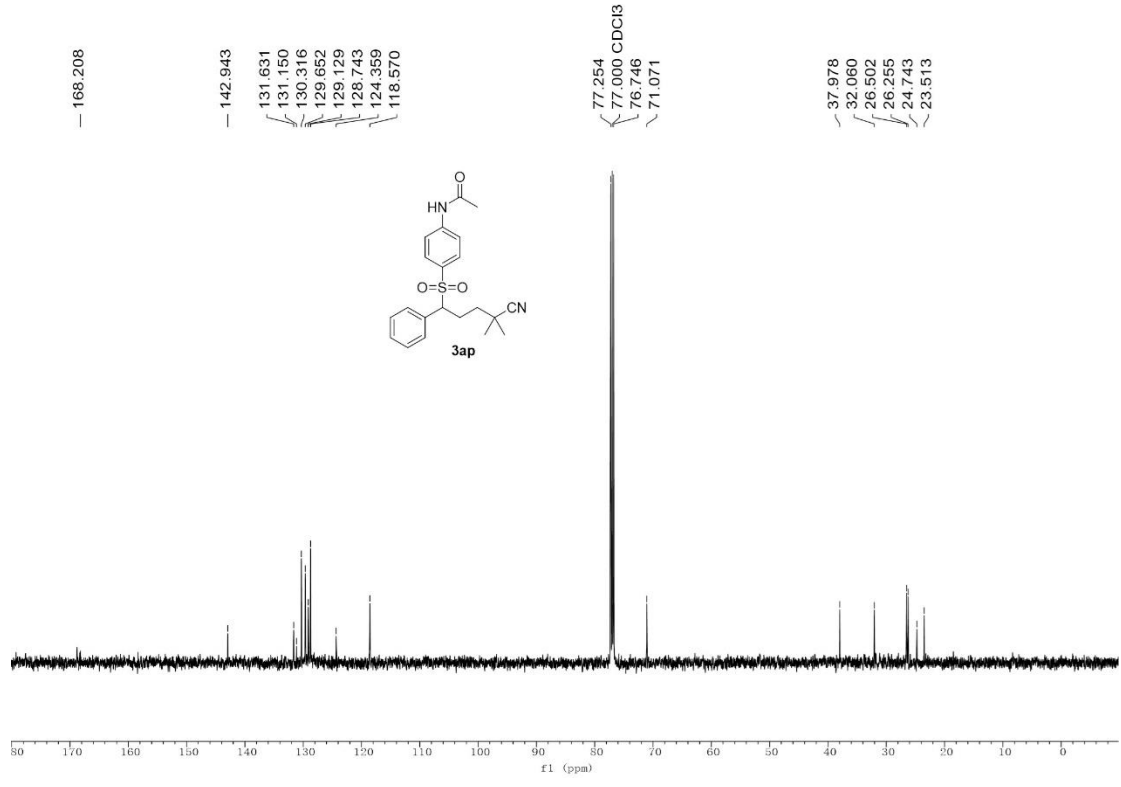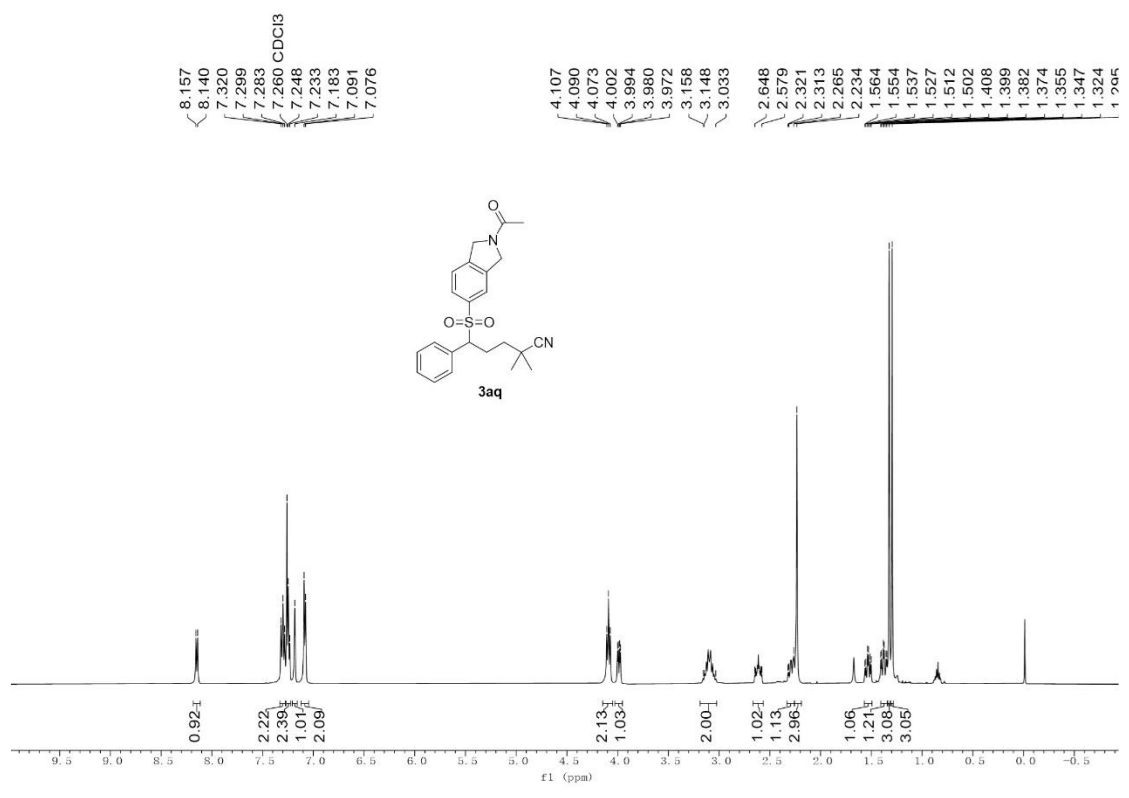

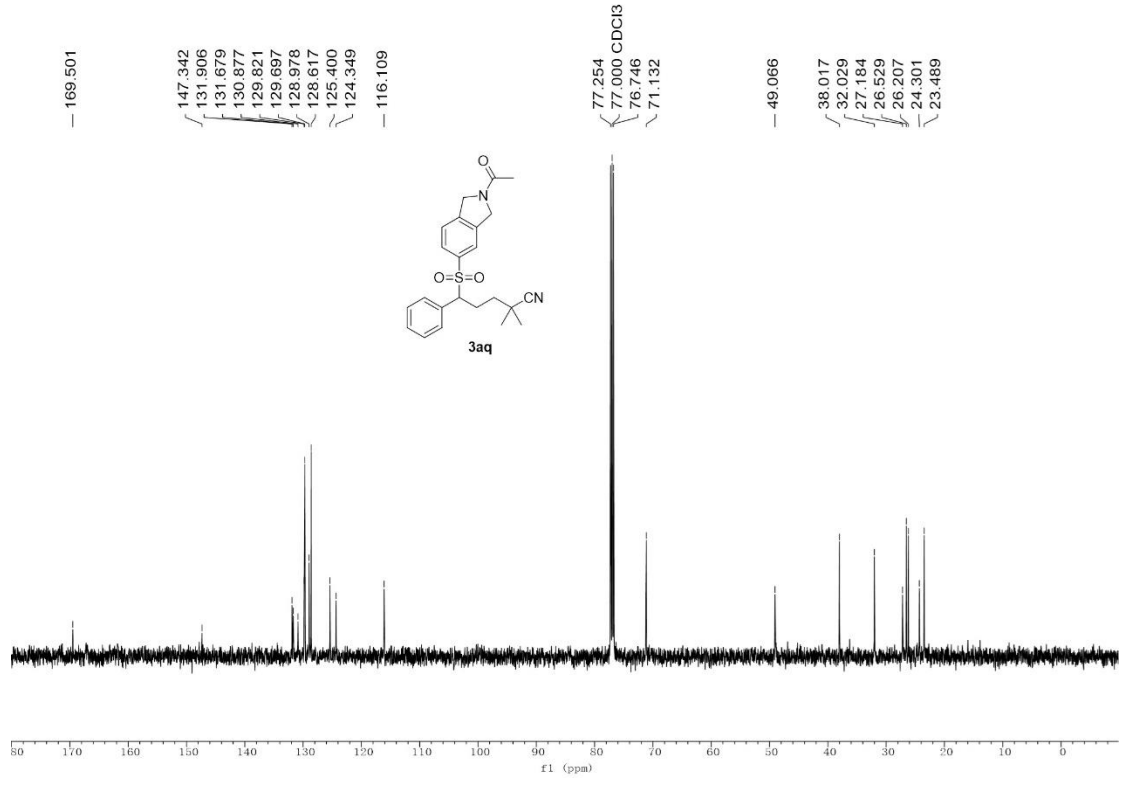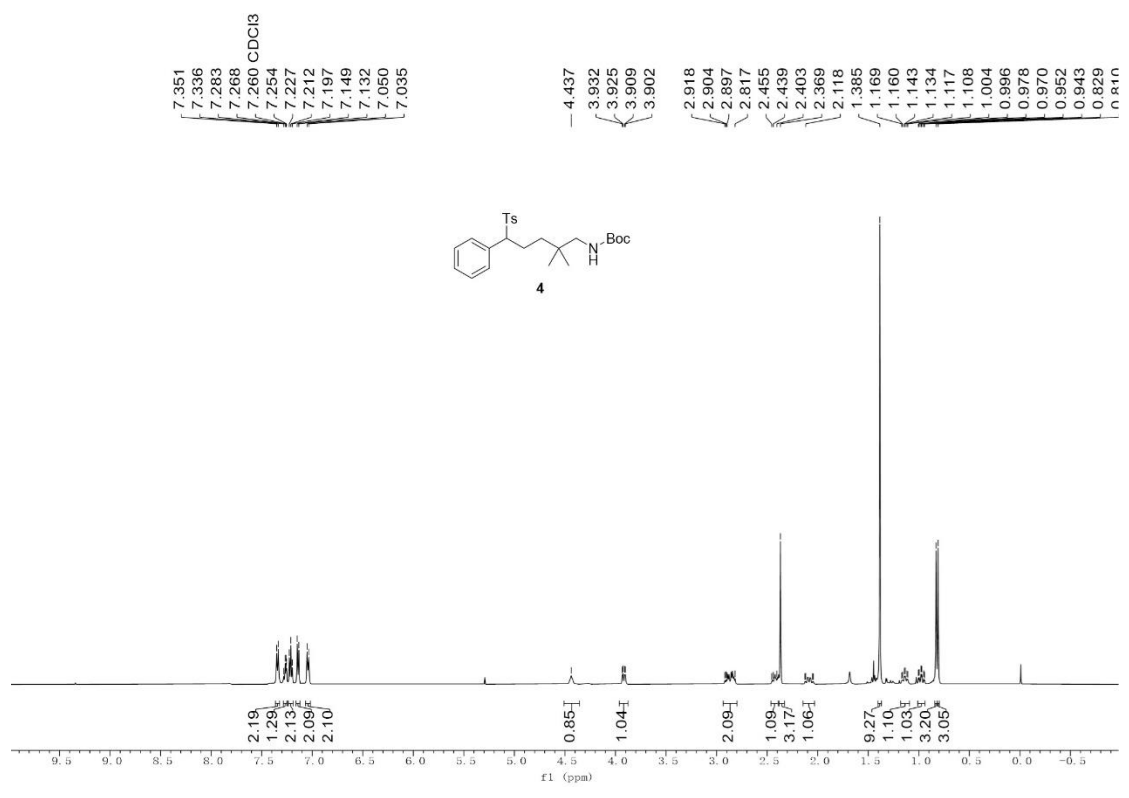

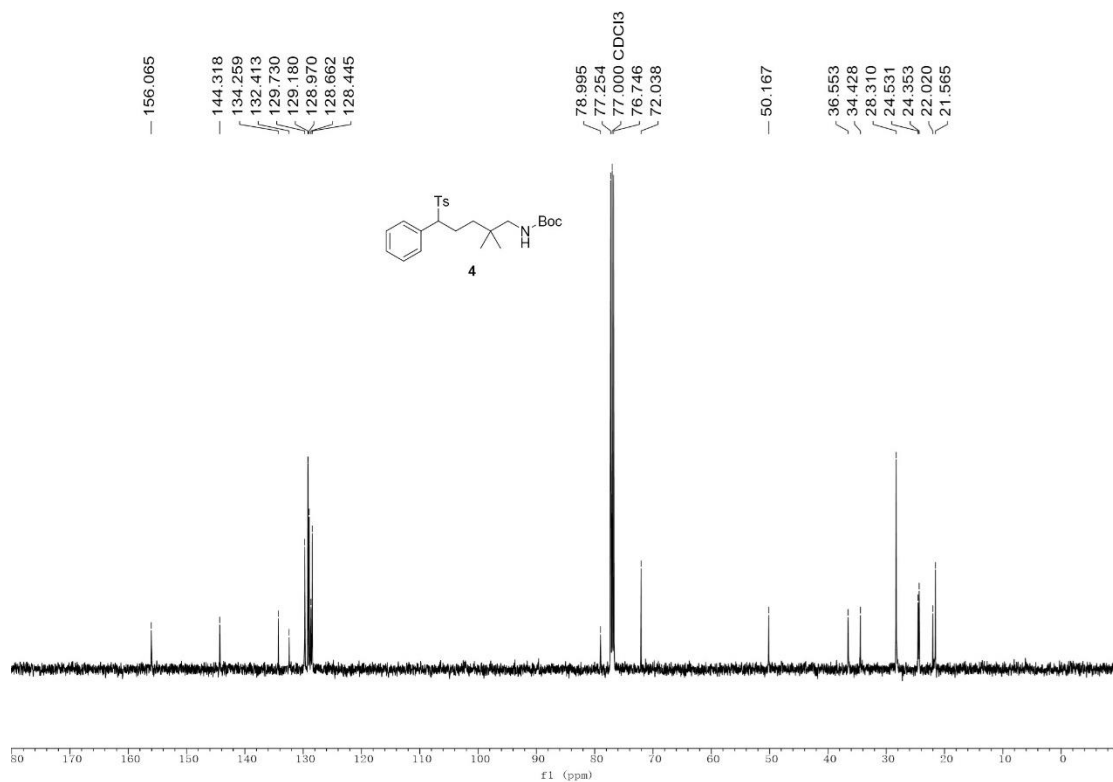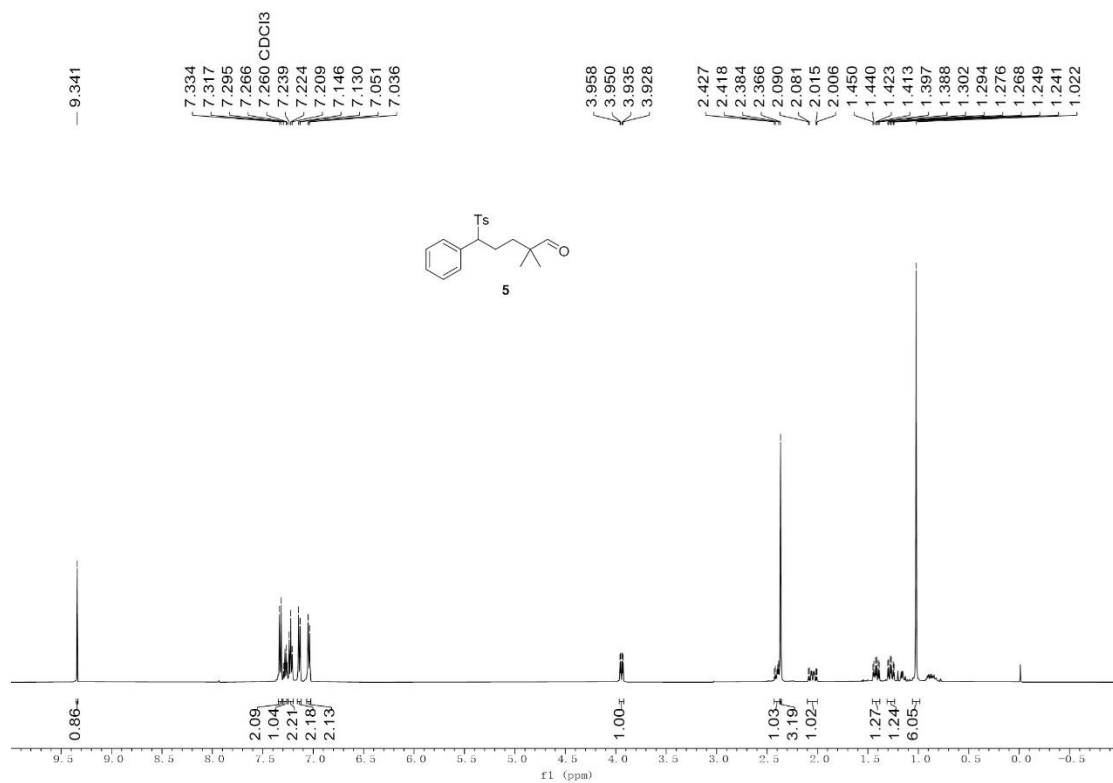

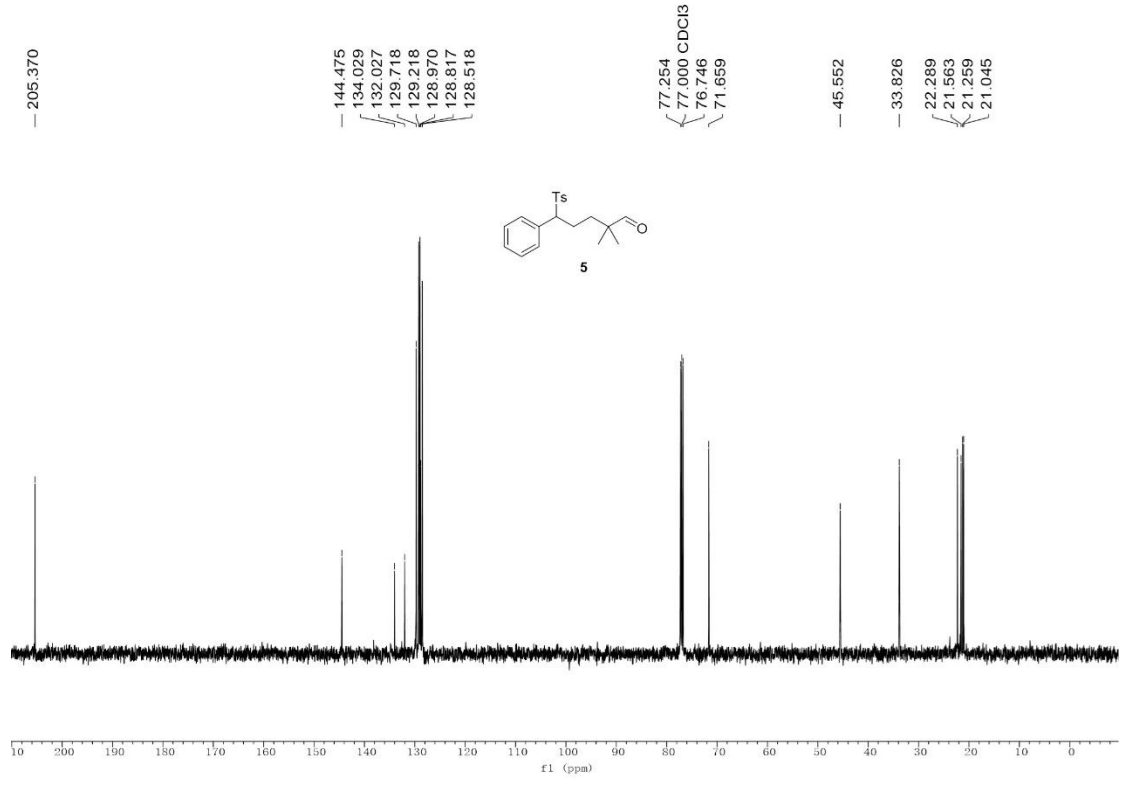

Supplement: d4qo00827h1.pdf [file d4qo00827h1.pdf]
